# Supplementary material for: The epidemiology and direct medical costs of diseases associated with human papillomavirus infection among men in Manitoba, Canada
Source: bioRxiv or medRxiv preprint supplement (doi:10.1101/2020.12.02.20242891), 2020-12-04
Supplement: Supplementary file [file media-1.pdf]

Supplementary material to “**The epidemiology and direct medical costs of diseases associated with human papillomavirus infection among men in Manitoba, Canada**” by Christiaan H. Righolt, Gurpreet Pabla, Salaheddin M. Mahmud

|                                                                                                                                                                                                                                          |    |
|------------------------------------------------------------------------------------------------------------------------------------------------------------------------------------------------------------------------------------------|----|
| <b>Supplementary tables</b> .....                                                                                                                                                                                                        | 12 |
| Supplementary Table 1: ICD-O-3 topography and morphology codes for HPV-related cancers of interest .....                                                                                                                                 | 12 |
| Supplementary Table 2: Tariff codes used to identify male patients with anogenital warts in the medical claims [1] .....                                                                                                                 | 12 |
| Supplementary Table 3: Identification of hospitalized patients with anogenital warts [1] .....                                                                                                                                           | 12 |
| Supplementary Table 4: ICD-9-CM procedure codes used to assist in the identification of a male with anogenital warts [1].....                                                                                                            | 13 |
| Supplementary Table 5: ICD-10 procedure codes used to assist in the identification of a male with anogenital warts [1] .....                                                                                                             | 13 |
| Supplementary Table 6: Tariff codes for treatment of anogenital warts used to assist in the identification of a male with anogenital warts [1] .....                                                                                     | 14 |
| Supplementary Table 7 Fraction of HPV-related diseases attributable to the HPV types included in different HPV vaccines [2].....                                                                                                         | 15 |
| Supplementary Table 8 Overall fraction of HPV-related diseases attributable to any HPV type .....                                                                                                                                        | 15 |
| <b>Incidence Rates</b> .....                                                                                                                                                                                                             | 16 |
| Supplementary Table 9 Age-standardized incidence rates (95% confidence interval) per 100,000 person-years of HPV-related diseases among Manitoba males by regional health authority of residence (1997 - 2016).....                      | 16 |
| Supplementary Table 10 Age-standardized incidence rates (95% confidence interval) per 100,000 person-years of HPV-related diseases among Manitoba males by Winnipeg region of residence (1997 - 2016).....                               | 16 |
| Supplementary Table 11 Age-standardized incidence rates (95% confidence interval) per 100,000 person-years of HPV-related diseases among Manitoba males by year of diagnosis. ....                                                       | 17 |
| Supplementary Table 12 Crude incidence rates (95% confidence interval) per 100,000 person-years of anogenital warts among Manitoba males by age group and regional health authority and Winnipeg region of residence (1997 - 2016). .... | 18 |
| <b>Incidence Rates by age and year of diagnosis</b> .....                                                                                                                                                                                | 19 |
| Supplementary Table 13 Crude incidence rates (95% confidence interval) per 100,000 person-years of anogenital warts among Manitoba males by age group and year of diagnosis. ....                                                        | 19 |
| Supplementary Table 14 Crude incidence rates (95% confidence interval) per 100,000 person-years of all HPV-related carcinoma <i>in situ</i> among Manitoba males by age group and year of diagnosis. ....                                | 19 |
| Supplementary Table 15 Crude incidence rates (95% confidence interval) per 100,000 person-years of all HPV-related invasive cancers among Manitoba males by age group and year of diagnosis. ....                                        | 19 |
| Supplementary Table 16 Crude incidence rates (95% confidence interval) per 100,000 person-years of invasive cancer of the anus among Manitoba males by age group and year of diagnosis. ....                                             | 21 |

Supplementary Table 17 Crude incidence rates (95% confidence interval) per 100,000 person-years of invasive cancer of the oral cavity among Manitoba males by age group and year of diagnosis. .... 21

Supplementary Table 18 Crude incidence rates (95% confidence interval) per 100,000 person-years of invasive cancer of the oropharynx among Manitoba males by age group and year of diagnosis. .... 21

Supplementary Table 19 Crude incidence rates (95% confidence interval) per 100,000 person-years of invasive cancer of the penis among Manitoba males by age group and year of diagnosis. .... 23

Incidence Rates by birth year cohort and year of diagnosis ..... 24

Supplementary Table 20 Crude incidence rates (95% confidence interval) per 100,000 person-years of anogenital warts among Manitoba males by birth year and year of diagnosis. .... 24

Supplementary Table 21 Crude incidence rates (95% confidence interval) per 100,000 person-years of all HPV-related carcinoma *in situ* among Manitoba males by birth year and year of diagnosis. .... 24

Supplementary Table 22 Crude incidence rates (95% confidence interval) per 100,000 person-years of all HPV-related invasive cancers among Manitoba males by birth year and year of diagnosis. 25

Supplementary Table 23 Crude incidence rates (95% confidence interval) per 100,000 person-years of invasive cancer of the anus among Manitoba males by birth year and year of diagnosis. .... 25

Supplementary Table 24 Crude incidence rates (95% confidence interval) per 100,000 person-years of invasive cancer of the oral cavity among Manitoba males by birth year and year of diagnosis. .... 26

Supplementary Table 25 Crude incidence rates (95% confidence interval) per 100,000 person-years of invasive cancer of the oropharynx among Manitoba males by birth year and year of diagnosis. .... 26

Supplementary Table 26 Crude incidence rates (95% confidence interval) per 100,000 person-years of invasive cancer of the penis among Manitoba males by birth year and year of diagnosis. .... 27

Incidence Rates by birth year cohort and age ..... 28

Supplementary Table 27 Crude incidence rates (95% confidence interval) per 100,000 person-years of anogenital warts among Manitoba males by birth year and age group. .... 28

Supplementary Table 28 Crude incidence rates (95% confidence interval) per 100,000 person-years of all HPV-related carcinoma *in situ* among Manitoba males by birth year and age group. .... 28

Supplementary Table 29 Crude incidence rates (95% confidence interval) per 100,000 person-years of all HPV-related invasive cancers among Manitoba males by birth year and age group. .... 29

Supplementary Table 30 Crude incidence rates (95% confidence interval) per 100,000 person-years of invasive cancer of the anus among Manitoba males by birth year and age group. .... 29

Supplementary Table 31 Crude incidence rates (95% confidence interval) per 100,000 person-years of invasive cancer of the oral cavity among Manitoba males by birth year and age group. .... 30

Supplementary Table 32 Crude incidence rates (95% confidence interval) per 100,000 person-years of invasive cancer of the oropharynx among Manitoba males by birth year and age group. .... 30

Supplementary Table 33 Crude incidence rates (95% confidence interval) per 100,000 person-years of invasive cancer of the penis among Manitoba males by birth year and age group. .... 31

Costing ..... 32

|                                                                                                                                                                                                                                                   |    |
|---------------------------------------------------------------------------------------------------------------------------------------------------------------------------------------------------------------------------------------------------|----|
| Supplementary Table 34 Total net direct medical cost <sup>1</sup> of HPV-related diseases (for patients compared to their matches) in 2017 Canadian dollars among Manitoba males (1997-2015).....                                                 | 32 |
| Supplementary Table 35 Total net direct medical cost <sup>1</sup> of HPV-related diseases (for patients compared to their matches) in 2017 Canadian dollars among Manitoba males by age group (1997-2015).....                                    | 32 |
| Supplementary Table 36 Total net direct medical cost <sup>1</sup> of HPV-related diseases (for patients compared to their matches) in 2017 Canadian dollars among Manitoba males by regional health authority of residence (1997-2015).....       | 34 |
| Supplementary Table 37 Total net direct medical cost <sup>1</sup> of HPV-related diseases (for patients compared to their matches) in 2017 Canadian dollars among Manitoba males by Winnipeg region of residence (1997-2015).....                 | 34 |
| Supplementary Table 38 Total net direct medical cost <sup>1</sup> of HPV-related diseases (for patients compared to their matches) in 2017 Canadian dollars among Manitoba males by year of diagnosis (1997-2015).....                            | 36 |
| Supplementary Table 39 Average of net direct medical cost of HPV-related diseases (for patients compared to their matches) in 2017 Canadian dollars among Manitoba males by successive 90-day periods before and after diagnosis (1997-2015)..... | 38 |
| Supplementary Table 40 Median of net direct medical cost of HPV-related diseases (for patients compared to their matches) in 2017 Canadian dollars among Manitoba males by successive 90-day periods before and after diagnosis (1997-2015).....  | 39 |
| <b><u>Net cost by age</u></b> .....                                                                                                                                                                                                               | 40 |
| Supplementary Table 41 Distribution of net direct medical cost <sup>1</sup> of anogenital warts (for patients compared to their matches) in 2017 Canadian dollars among Manitoba males by age group (1997-2015).....                              | 40 |
| Supplementary Table 42 Distribution of net direct medical cost <sup>1</sup> of HPV-related carcinoma <i>in situ</i> (for patients compared to their matches) in 2017 Canadian dollars among Manitoba males by age group (1997-2015).....          | 40 |
| Supplementary Table 43 Distribution of net direct medical cost <sup>1</sup> of HPV-related invasive cancer (for patients compared to their matches) in 2017 Canadian dollars among Manitoba males by age group (1997-2015).....                   | 40 |
| Supplementary Table 44 Distribution of net direct medical cost <sup>1</sup> of invasive cancer of the anus (for patients compared to their matches) in 2017 Canadian dollars among Manitoba males by age group (1997-2015).....                   | 42 |
| Supplementary Table 45 Distribution of net direct medical cost <sup>1</sup> of invasive cancer of the oral cavity (for patients compared to their matches) in 2017 Canadian dollars among Manitoba males by age group (1997-2015).....            | 42 |
| Supplementary Table 46 Distribution of net direct medical cost <sup>1</sup> of invasive cancer of the oropharynx (for patients compared to their matches) in 2017 Canadian dollars among Manitoba males by age group (1997-2015).....             | 42 |
| Supplementary Table 47 Distribution of net direct medical cost <sup>1</sup> of invasive cancer of the penis (for patients compared to their matches) in 2017 Canadian dollars among Manitoba males by age group (1997-2015).....                  | 43 |
| <b><u>Net cost by regional health authority and Winnipeg region of residence</u></b> .....                                                                                                                                                        | 44 |

|                                                                                                                                                                                                                                                                                            |           |
|--------------------------------------------------------------------------------------------------------------------------------------------------------------------------------------------------------------------------------------------------------------------------------------------|-----------|
| Supplementary Table 48 Distribution of net direct medical cost <sup>1</sup> of anogenital warts (for patients compared to their matches) in 2017 Canadian dollars among Manitoba males by regional health authority and Winnipeg region of residence (1997-2015) .....                     | 44        |
| Supplementary Table 49 Distribution of net direct medical cost <sup>1</sup> of HPV-related carcinoma <i>in situ</i> (for patients compared to their matches) in 2017 Canadian dollars among Manitoba males by regional health authority and Winnipeg region of residence (1997-2015) ..... | 44        |
| Supplementary Table 50 Distribution of net direct medical cost <sup>1</sup> of HPV-related invasive cancer (for patients compared to their matches) in 2017 Canadian dollars among Manitoba males by regional health authority and Winnipeg region of residence (1997-2015) .....          | 45        |
| Supplementary Table 51 Distribution of net direct medical cost <sup>1</sup> of invasive cancer of the anus (for patients compared to their matches) in 2017 Canadian dollars among Manitoba males by regional health authority and Winnipeg region of residence (1997-2015) .....          | 45        |
| Supplementary Table 52 Distribution of net direct medical cost <sup>1</sup> of invasive cancer of the oral cavity (for patients compared to their matches) in 2017 Canadian dollars among Manitoba males by regional health authority and Winnipeg region of residence (1997-2015).....    | 46        |
| Supplementary Table 53 Distribution of net direct medical cost <sup>1</sup> of invasive cancer of the oropharynx (for patients compared to their matches) in 2017 Canadian dollars among Manitoba males by regional health authority and Winnipeg region of residence (1997-2015).....     | 46        |
| Supplementary Table 54 Distribution of net direct medical cost <sup>1</sup> of invasive cancer of the penis (for patients compared to their matches) in 2017 Canadian dollars among Manitoba males by regional health authority and Winnipeg region of residence (1997-2015) .....         | 47        |
| <b>Net cost by year of diagnosis</b> .....                                                                                                                                                                                                                                                 | <b>48</b> |
| Supplementary Table 55 Distribution of net direct medical cost <sup>1</sup> of anogenital warts (for patients compared to their matches) in 2017 Canadian dollars among Manitoba males by year of diagnosis (1997-2015) .....                                                              | 48        |
| Supplementary Table 56 Distribution of net direct medical cost <sup>1</sup> of HPV-related carcinoma <i>in situ</i> (for patients compared to their matches) in 2017 Canadian dollars among Manitoba males by year of diagnosis (1997-2015).....                                           | 49        |
| Supplementary Table 57 Distribution of net direct medical cost <sup>1</sup> of HPV-related invasive cancer (for patients compared to their matches) in 2017 Canadian dollars among Manitoba males by year of diagnosis (1997-2015) .....                                                   | 50        |
| Supplementary Table 58 Distribution of net direct medical cost <sup>1</sup> of invasive cancer of the anus (for patients compared to their matches) in 2017 Canadian dollars among Manitoba males by year of diagnosis (1997-2015) .....                                                   | 51        |
| Supplementary Table 59 Distribution of net direct medical cost <sup>1</sup> of invasive cancer of the oral cavity (for patients compared to their matches) in 2017 Canadian dollars among Manitoba males by year of diagnosis (1997-2015).....                                             | 52        |
| Supplementary Table 60 Distribution of net direct medical cost <sup>1</sup> of invasive cancer of the oropharynx (for patients compared to their matches) in 2017 Canadian dollars among Manitoba males by year of diagnosis (1997-2015).....                                              | 53        |
| Supplementary Table 61 Distribution of net direct medical cost <sup>1</sup> of invasive cancer of the penis (for patients compared to their matches) in 2017 Canadian dollars among Manitoba males by year of diagnosis (1997-2015) .....                                                  | 54        |
| <b>Healthcare utilization</b> .....                                                                                                                                                                                                                                                        | <b>55</b> |

|                                                                                                                                                                                                                                             |    |
|---------------------------------------------------------------------------------------------------------------------------------------------------------------------------------------------------------------------------------------------|----|
| Supplementary Table 62 Average number of healthcare encounters <sup>1</sup> (per year) of HPV-related disease patients and their matches among Manitoba males (1997-2015) .....                                                             | 55 |
| Supplementary Table 63 Excess number of healthcare encounters <sup>1</sup> (per year) due to HPV-related diseases (for patients compared to their matches) among Manitoba males (1997-2015).....                                            | 56 |
| Supplementary Table 64 Distribution of excess number of healthcare encounters <sup>1</sup> (per year) due to HPV-related diseases (for patients compared to their matches) among Manitoba males (1997-2015) .....                           | 57 |
| <b><u>Excess healthcare utilization by age</u></b> .....                                                                                                                                                                                    | 59 |
| Supplementary Table 65 Distribution of excess number of clinician visits <sup>1</sup> (per year) due to anogenital warts (for patients compared to their matches) among Manitoba males by age group (1997-2015). .....                      | 59 |
| Supplementary Table 66 Distribution of excess number of hospital admissions <sup>1</sup> (per year) due to anogenital warts (for patients compared to their matches) among Manitoba males by age group (1997-2015). .....                   | 59 |
| Supplementary Table 67 Distribution of excess number of ER visits <sup>1,2</sup> (per year) due to anogenital warts (for patients compared to their matches) among Manitoba males by age group (1997-2015).....                             | 59 |
| Supplementary Table 68 Distribution of excess number of prescriptions <sup>1</sup> (per year) due to anogenital warts (for patients compared to their matches) among Manitoba males by age group (1997-2015). .....                         | 60 |
| Supplementary Table 69 Distribution of excess number of clinician visits <sup>1</sup> (per year) due to HPV-related carcinoma <i>in situ</i> (for patients compared to their matches) among Manitoba males by age group (1997-2015). .....  | 60 |
| Supplementary Table 70 Distribution of excess number of hospital admissions <sup>1</sup> (per year) due to HPV-related carcinoma <i>in situ</i> (for patients compared to their matches) among Manitoba males by age group (1997-2015)..... | 60 |
| Supplementary Table 71 Distribution of excess number of ER visits <sup>1,2</sup> (per year) due to HPV-related carcinoma <i>in situ</i> (for patients compared to their matches) among Manitoba males by age group (1997-2015). .....       | 62 |
| Supplementary Table 72 Distribution of excess number of prescriptions <sup>1</sup> (per year) due to HPV-related carcinoma <i>in situ</i> (for patients compared to their matches) among Manitoba males by age group (1997-2015). .....     | 62 |
| Supplementary Table 73 Distribution of excess number of clinician visits <sup>1</sup> (per year) due to HPV-related invasive cancer (for patients compared to their matches) among Manitoba males by age group (1997-2015). .....           | 62 |
| Supplementary Table 74 Distribution of excess number of hospital admissions <sup>1</sup> (per year) due to HPV-related invasive cancer (for patients compared to their matches) among Manitoba males by age group (1997-2015). .....        | 64 |
| Supplementary Table 75 Distribution of excess number of ER visits <sup>1,2</sup> (per year) due to HPV-related invasive cancer (for patients compared to their matches) among Manitoba males by age group (1997-2015). .....                | 64 |
| Supplementary Table 76 Distribution of excess number of prescriptions <sup>1</sup> (per year) due to HPV-related invasive cancer (for patients compared to their matches) among Manitoba males by age group (1997-2015). .....              | 64 |

|                                                                                                                                                                                                                                             |    |
|---------------------------------------------------------------------------------------------------------------------------------------------------------------------------------------------------------------------------------------------|----|
| Supplementary Table 77 Distribution of excess number of clinician visits <sup>1</sup> (per year) due to invasive cancer of the anus (for patients compared to their matches) among Manitoba males by age group (1997-2015). .....           | 66 |
| Supplementary Table 78 Distribution of excess number of hospital admissions <sup>1</sup> (per year) due to invasive cancer of the anus (for patients compared to their matches) among Manitoba males by age group (1997-2015). .....        | 66 |
| Supplementary Table 79 Distribution of excess number of ER visits <sup>1,2</sup> (per year) due to invasive cancer of the anus (for patients compared to their matches) among Manitoba males by age group (1997-2015). .....                | 66 |
| Supplementary Table 80 Distribution of excess number of prescriptions <sup>1</sup> (per year) due to invasive cancer of the anus (for patients compared to their matches) among Manitoba males by age group (1997-2015). .....              | 67 |
| Supplementary Table 81 Distribution of excess number of clinician visits <sup>1</sup> (per year) due to invasive cancer of the oral cavity (for patients compared to their matches) among Manitoba males by age group (1997-2015). .....    | 67 |
| Supplementary Table 82 Distribution of excess number of hospital admissions <sup>1</sup> (per year) due to invasive cancer of the oral cavity (for patients compared to their matches) among Manitoba males by age group (1997-2015). ..... | 67 |
| Supplementary Table 83 Distribution of excess number of ER visits <sup>1,2</sup> (per year) due to invasive cancer of the oral cavity (for patients compared to their matches) among Manitoba males by age group (1997-2015). .....         | 68 |
| Supplementary Table 84 Distribution of excess number of prescriptions <sup>1</sup> (per year) due to invasive cancer of the oral cavity (for patients compared to their matches) among Manitoba males by age group (1997-2015). .....       | 69 |
| Supplementary Table 85 Distribution of excess number of clinician visits <sup>1</sup> (per year) due to invasive cancer of the oropharynx (for patients compared to their matches) among Manitoba males by age group (1997-2015). .....     | 69 |
| Supplementary Table 86 Distribution of excess number of hospital admissions <sup>1</sup> (per year) due to invasive cancer of the oropharynx (for patients compared to their matches) among Manitoba males by age group (1997-2015). .....  | 69 |
| Supplementary Table 87 Distribution of excess number of ER visits <sup>1,2</sup> (per year) due to invasive cancer of the oropharynx (for patients compared to their matches) among Manitoba males by age group (1997-2015). .....          | 70 |
| Supplementary Table 88 Distribution of excess number of prescriptions <sup>1</sup> (per year) due to invasive cancer of the oropharynx (for patients compared to their matches) among Manitoba males by age group (1997-2015). .....        | 70 |
| Supplementary Table 89 Distribution of excess number of clinician visits <sup>1</sup> (per year) due to invasive cancer of the penis (for patients compared to their matches) among Manitoba males by age group (1997-2015). .....          | 70 |
| Supplementary Table 90 Distribution of excess number of hospital admissions <sup>1</sup> (per year) due to invasive cancer of the penis (for patients compared to their matches) among Manitoba males by age group (1997-2015). .....       | 71 |

|                                                                                                                                                                                                                                                                                                |           |
|------------------------------------------------------------------------------------------------------------------------------------------------------------------------------------------------------------------------------------------------------------------------------------------------|-----------|
| Supplementary Table 91 Distribution of excess number of ER visits <sup>1,2</sup> (per year) due to invasive cancer of the penis (for patients compared to their matches) among Manitoba males by age group (1997-2015). .....                                                                  | 71        |
| Supplementary Table 92 Distribution of excess number of prescriptions <sup>1</sup> (per year) due to invasive cancer of the penis (for patients compared to their matches) among Manitoba males by age group (1997-2015). .....                                                                | 71        |
| <b><u>Excess healthcare utilization by regional health authority and Winnipeg region of residence</u></b> .....                                                                                                                                                                                | <b>73</b> |
| Supplementary Table 93 Distribution of excess number of clinician visits <sup>1</sup> (per year) due to anogenital warts (for patients compared to their matches) among Manitoba males by regional health authority and Winnipeg region of residence (1997-2015). .....                        | 73        |
| Supplementary Table 94 Distribution of excess number of hospital admissions <sup>1</sup> (per year) due to anogenital warts (for patients compared to their matches) among Manitoba males by regional health authority and Winnipeg region of residence (1997-2015). .....                     | 73        |
| Supplementary Table 95 Distribution of excess number of ER visits <sup>1,2</sup> (per year) due to anogenital warts (for patients compared to their matches) among Manitoba males by regional health authority and Winnipeg region of residence (1997-2015). .....                             | 74        |
| Supplementary Table 96 Distribution of excess number of prescriptions <sup>1</sup> (per year) due to anogenital warts (for patients compared to their matches) among Manitoba males by regional health authority and Winnipeg region of residence (1997-2015). .....                           | 74        |
| Supplementary Table 97 Distribution of excess number of clinician visits <sup>1</sup> (per year) due to HPV-related carcinoma <i>in situ</i> (for patients compared to their matches) among Manitoba males by regional health authority and Winnipeg region of residence (1997-2015). .....    | 75        |
| Supplementary Table 98 Distribution of excess number of hospital admissions <sup>1</sup> (per year) due to HPV-related carcinoma <i>in situ</i> (for patients compared to their matches) among Manitoba males by regional health authority and Winnipeg region of residence (1997-2015). ..... | 75        |
| Supplementary Table 99 Distribution of excess number of ER visits <sup>1,2</sup> (per year) due to HPV-related carcinoma <i>in situ</i> (for patients compared to their matches) among Manitoba males by regional health authority and Winnipeg region of residence (1997-2015). .....         | 76        |
| Supplementary Table 100 Distribution of excess number of prescriptions <sup>1</sup> (per year) due to HPV-related carcinoma <i>in situ</i> (for patients compared to their matches) among Manitoba males by regional health authority and Winnipeg region of residence (1997-2015). .....      | 76        |
| Supplementary Table 101 Distribution of excess number of clinician visits <sup>1</sup> (per year) due to HPV-related invasive cancer (for patients compared to their matches) among Manitoba males by regional health authority and Winnipeg region of residence (1997-2015). .....            | 77        |
| Supplementary Table 102 Distribution of excess number of hospital admissions <sup>1</sup> (per year) due to HPV-related invasive cancer (for patients compared to their matches) among Manitoba males by regional health authority and Winnipeg region of residence (1997-2015). .....         | 77        |
| Supplementary Table 103 Distribution of excess number of ER visits <sup>1,2</sup> (per year) due to HPV-related invasive cancer (for patients compared to their matches) among Manitoba males by regional health authority and Winnipeg region of residence (1997-2015). .....                 | 78        |
| Supplementary Table 104 Distribution of excess number of prescriptions <sup>1</sup> (per year) due to HPV-related invasive cancer (for patients compared to their matches) among Manitoba males by regional health authority and Winnipeg region of residence (1997-2015). .....               | 78        |

Supplementary Table 105 Distribution of excess number of clinician visits<sup>1</sup> (per year) due to invasive cancer of the anus (for patients compared to their matches) among Manitoba males by regional health authority and Winnipeg region of residence (1997-2015). ..... 79

Supplementary Table 106 Distribution of excess number of hospital admissions<sup>1</sup> (per year) due to invasive cancer of the anus (for patients compared to their matches) among Manitoba males by regional health authority and Winnipeg region of residence (1997-2015). ..... 79

Supplementary Table 107 Distribution of excess number of ER visits<sup>1,2</sup> (per year) due to invasive cancer of the anus (for patients compared to their matches) among Manitoba males by regional health authority and Winnipeg region of residence (1997-2015). ..... 80

Supplementary Table 108 Distribution of excess number of prescriptions<sup>1</sup> (per year) due to invasive cancer of the anus (for patients compared to their matches) among Manitoba males by regional health authority and Winnipeg region of residence (1997-2015). ..... 80

Supplementary Table 109 Distribution of excess number of clinician visits<sup>1</sup> (per year) due to invasive cancer of the oral cavity (for patients compared to their matches) among Manitoba males by regional health authority and Winnipeg region of residence (1997-2015). ..... 81

Supplementary Table 110 Distribution of excess number of hospital admissions<sup>1</sup> (per year) due to invasive cancer of the oral cavity (for patients compared to their matches) among Manitoba males by regional health authority and Winnipeg region of residence (1997-2015). ..... 81

Supplementary Table 111 Distribution of excess number of ER visits<sup>1,2</sup> (per year) due to invasive cancer of the oral cavity (for patients compared to their matches) among Manitoba males by regional health authority and Winnipeg region of residence (1997-2015). ..... 82

Supplementary Table 112 Distribution of excess number of prescriptions<sup>1</sup> (per year) due to invasive cancer of the oral cavity (for patients compared to their matches) among Manitoba males by regional health authority and Winnipeg region of residence (1997-2015). ..... 82

Supplementary Table 113 Distribution of excess number of clinician visits<sup>1</sup> (per year) due to invasive cancer of the oropharynx (for patients compared to their matches) among Manitoba males by regional health authority and Winnipeg region of residence (1997-2015). ..... 83

Supplementary Table 114 Distribution of excess number of hospital admissions<sup>1</sup> (per year) due to invasive cancer of the oropharynx (for patients compared to their matches) among Manitoba males by regional health authority and Winnipeg region of residence (1997-2015). ..... 83

Supplementary Table 115 Distribution of excess number of ER visits<sup>1,2</sup> (per year) due to invasive cancer of the oropharynx (for patients compared to their matches) among Manitoba males by regional health authority and Winnipeg region of residence (1997-2015). ..... 84

Supplementary Table 116 Distribution of excess number of prescriptions<sup>1</sup> (per year) due to invasive cancer of the oropharynx (for patients compared to their matches) among Manitoba males by regional health authority and Winnipeg region of residence (1997-2015). ..... 84

Supplementary Table 117 Distribution of excess number of clinician visits<sup>1</sup> (per year) due to invasive cancer of the penis (for patients compared to their matches) among Manitoba males by regional health authority and Winnipeg region of residence (1997-2015). ..... 85

Supplementary Table 118 Distribution of excess number of hospital admissions<sup>1</sup> (per year) due to invasive cancer of the penis (for patients compared to their matches) among Manitoba males by regional health authority and Winnipeg region of residence (1997-2015). ..... 85



|                                                                                                                                                                                                                                                                                 |           |
|---------------------------------------------------------------------------------------------------------------------------------------------------------------------------------------------------------------------------------------------------------------------------------|-----------|
| Supplementary Table 119 Distribution of excess number of ER visits <sup>1,2</sup> (per year) due to invasive cancer of the penis (for patients compared to their matches) among Manitoba males by regional health authority and Winnipeg region of residence (1997-2015).....   | 86        |
| Supplementary Table 120 Distribution of excess number of prescriptions <sup>1</sup> (per year) due to invasive cancer of the penis (for patients compared to their matches) among Manitoba males by regional health authority and Winnipeg region of residence (1997-2015)..... | 86        |
| <b>Excess healthcare utilization by year of diagnosis</b> .....                                                                                                                                                                                                                 | <b>87</b> |
| Supplementary Table 121 Distribution of excess number of clinician visits <sup>1</sup> (per year) due to anogenital warts (for patients compared to their matches) among Manitoba males by year of diagnosis (1997-2015).....                                                   | 87        |
| Supplementary Table 122 Distribution of excess number of hospital admissions <sup>1</sup> (per year) due to anogenital warts (for patients compared to their matches) among Manitoba males by year of diagnosis (1997-2015).....                                                | 88        |
| Supplementary Table 123 Distribution of excess number of ER visits <sup>1,2</sup> (per year) due to anogenital warts (for patients compared to their matches) among Manitoba males by year of diagnosis (1997-2015). .....                                                      | 89        |
| Supplementary Table 124 Distribution of excess number of prescriptions <sup>1</sup> (per year) due to anogenital warts (for patients compared to their matches) among Manitoba males by year of diagnosis (1997-2015).....                                                      | 90        |
| Supplementary Table 125 Distribution of excess number of clinician visits <sup>1</sup> (per year) due to HPV-related carcinoma <i>in situ</i> (for patients compared to their matches) among Manitoba males by year of diagnosis (1997-2015). .....                             | 91        |
| Supplementary Table 126 Distribution of excess number of hospital admissions <sup>1</sup> (per year) due to HPV-related carcinoma <i>in situ</i> (for patients compared to their matches) among Manitoba males by year of diagnosis (1997-2015).....                            | 92        |
| Supplementary Table 127 Distribution of excess number of ER visits <sup>1,2</sup> (per year) due to HPV-related carcinoma <i>in situ</i> (for patients compared to their matches) among Manitoba males by year of diagnosis (1997-2015). .....                                  | 93        |
| Supplementary Table 128 Distribution of excess number of prescriptions <sup>1</sup> (per year) due to HPV-related carcinoma <i>in situ</i> (for patients compared to their matches) among Manitoba males by year of diagnosis (1997-2015). .....                                | 94        |
| Supplementary Table 129 Distribution of excess number of clinician visits <sup>1</sup> (per year) due to HPV-related invasive cancer (for patients compared to their matches) among Manitoba males by year of diagnosis (1997-2015).....                                        | 95        |
| Supplementary Table 130 Distribution of excess number of hospital admissions <sup>1</sup> (per year) due to HPV-related invasive cancer (for patients compared to their matches) among Manitoba males by year of diagnosis (1997-2015). .....                                   | 96        |
| Supplementary Table 131 Distribution of excess number of ER visits <sup>1,2</sup> (per year) due to HPV-related invasive cancer (for patients compared to their matches) among Manitoba males by year of diagnosis (1997-2015).....                                             | 97        |
| Supplementary Table 132 Distribution of excess number of prescriptions <sup>1</sup> (per year) due to HPV-related invasive cancer (for patients compared to their matches) among Manitoba males by year of diagnosis (1997-2015).....                                           | 98        |

|                                                                                                                                                                                                                                                      |     |
|------------------------------------------------------------------------------------------------------------------------------------------------------------------------------------------------------------------------------------------------------|-----|
| Supplementary Table 133 Distribution of excess number of clinician visits <sup>1</sup> (per year) due to invasive cancer of the anus (for patients compared to their matches) among Manitoba males by year of diagnosis (1997-2015). .....           | 99  |
| Supplementary Table 134 Distribution of excess number of hospital admissions <sup>1</sup> (per year) due to invasive cancer of the anus (for patients compared to their matches) among Manitoba males by year of diagnosis (1997-2015). .....        | 100 |
| Supplementary Table 135 Distribution of excess number of ER visits <sup>1,2</sup> (per year) due to invasive cancer of the anus (for patients compared to their matches) among Manitoba males by year of diagnosis (1997-2015). .....                | 101 |
| Supplementary Table 136 Distribution of excess number of prescriptions <sup>1</sup> (per year) due to invasive cancer of the anus (for patients compared to their matches) among Manitoba males by year of diagnosis (1997-2015). .....              | 102 |
| Supplementary Table 137 Distribution of excess number of clinician visits <sup>1</sup> (per year) due to invasive cancer of the oral cavity (for patients compared to their matches) among Manitoba males by year of diagnosis (1997-2015). .....    | 103 |
| Supplementary Table 138 Distribution of excess number of hospital admissions <sup>1</sup> (per year) due to invasive cancer of the oral cavity (for patients compared to their matches) among Manitoba males by year of diagnosis (1997-2015). ..... | 104 |
| Supplementary Table 139 Distribution of excess number of ER visits <sup>1,2</sup> (per year) due to invasive cancer of the oral cavity (for patients compared to their matches) among Manitoba males by year of diagnosis (1997-2015). .....         | 105 |
| Supplementary Table 140 Distribution of excess number of prescriptions <sup>1</sup> (per year) due to invasive cancer of the oral cavity (for patients compared to their matches) among Manitoba males by year of diagnosis (1997-2015). .....       | 106 |
| Supplementary Table 141 Distribution of excess number of clinician visits <sup>1</sup> (per year) due to invasive cancer of the oropharynx (for patients compared to their matches) among Manitoba males by year of diagnosis (1997-2015). .....     | 107 |
| Supplementary Table 142 Distribution of excess number of hospital admissions <sup>1</sup> (per year) due to invasive cancer of the oropharynx (for patients compared to their matches) among Manitoba males by year of diagnosis (1997-2015). .....  | 108 |
| Supplementary Table 143 Distribution of excess number of ER visits <sup>1,2</sup> (per year) due to invasive cancer of the oropharynx (for patients compared to their matches) among Manitoba males by year of diagnosis (1997-2015). .....          | 109 |
| Supplementary Table 144 Distribution of excess number of prescriptions <sup>1</sup> (per year) due to invasive cancer of the oropharynx (for patients compared to their matches) among Manitoba males by year of diagnosis (1997-2015). .....        | 110 |
| Supplementary Table 145 Distribution of excess number of clinician visits <sup>1</sup> (per year) due to invasive cancer of the penis (for patients compared to their matches) among Manitoba males by year of diagnosis (1997-2015). .....          | 111 |
| Supplementary Table 146 Distribution of excess number of hospital admissions <sup>1</sup> (per year) due to invasive cancer of the penis (for patients compared to their matches) among Manitoba males by year of diagnosis (1997-2015). .....       | 112 |

|                                                                                                                                                                                                                                                                         |     |
|-------------------------------------------------------------------------------------------------------------------------------------------------------------------------------------------------------------------------------------------------------------------------|-----|
| Supplementary Table 147 Distribution of excess number of ER visits <sup>1,2</sup> (per year) due to invasive cancer of the penis (for patients compared to their matches) among Manitoba males by year of diagnosis (1997-2015).....                                    | 113 |
| Supplementary Table 148 invasive cancer of the penis Distribution of excess number of prescriptions <sup>1</sup> (per year) due to invasive cancer of the penis (for patients compared to their matches) among Manitoba males by year of diagnosis (1997-2015).....     | 114 |
| <b><u>Attributable excess healthcare utilization</u></b> .....                                                                                                                                                                                                          | 115 |
| Supplementary Table 149 Excess number of healthcare encounters <sup>1</sup> (per year) due to HPV-related diseases (for patients compared to their matches) among Manitoba males according to different estimates of the attributable fraction (1997-2015).....         | 115 |
| Supplementary Table 150 Excess number of clinician visits <sup>1</sup> (per year) due to HPV-related diseases (for patients compared to their matches) among Manitoba males by year of diagnosis according to different estimates of the attributable fraction .....    | 117 |
| Supplementary Table 151 Excess number of hospital admissions <sup>1</sup> (per year) due to HPV-related diseases (for patients compared to their matches) among Manitoba males by year of diagnosis according to different estimates of the attributable fraction ..... | 118 |
| Supplementary Table 152 Excess number of ER visits <sup>1,2</sup> (per year) due to HPV-related diseases (for patients compared to their matches) among Manitoba males by year of diagnosis according to different estimates of the attributable fraction .....         | 119 |
| Supplementary Table 153 Excess number of prescriptions <sup>1</sup> (per year) due to HPV-related diseases (for patients compared to their matches) among Manitoba males by year of diagnosis according to different estimates of the attributable fraction .....       | 120 |
| References .....                                                                                                                                                                                                                                                        | 120 |

## Supplementary tables

Supplementary Table 1: **ICD-O-3 topography and morphology codes for HPV-related cancers of interest**

| <b>Cancer</b> | <b>ICD-O-3 Topography</b>                                              | <b>ICD-O-3 Morphology</b>                                         |
|---------------|------------------------------------------------------------------------|-------------------------------------------------------------------|
| Penile        | C60*                                                                   | Squamous cell carcinoma<br>(8050-8084, 8120-8131)                 |
| Anal          | C21*                                                                   | Squamous cell carcinoma<br>(8050-8084, 8120-8131; exclude 8077/2) |
| Oropharyngeal | C01*, C02.4, C02.8, C09*, C10.2,<br>C10.8, C10.9, C14*                 | Squamous cell carcinoma<br>(8050-8084, 8120-8131)                 |
| Oral cavity   | C00.3, C00.4, C00.5, C02.0, C02.1,<br>C02.2, C02.3, C02.9, C03* - C06* | Squamous cell carcinoma<br>(8050-8084, 8120-8131)                 |

Supplementary Table 2: **Tariff codes used to identify male patients with anogenital warts in the medical claims [1]**

| <b>Code</b> | <b>Description</b>                                                                     |
|-------------|----------------------------------------------------------------------------------------|
| 3372        | Anus, condyloma, single or multiple, internal or external, destruction, in hospital    |
| 3433        | Anus, condyloma, external, electrodesiccation, initial, per sitting                    |
| 3434        | Anus, condyloma, external, electrodesiccation, subsequent, per sitting                 |
| 4120        | Penis, penile skin lesion, including warts, local excision or fulguration, per sitting |

Supplementary Table 3: **Identification of hospitalized patients with anogenital warts [1]**

| <b>Date</b>     | <b>ICD version</b> | <b>Criteria</b>                                                             | <b>Number of fields<sup>1</sup></b> |
|-----------------|--------------------|-----------------------------------------------------------------------------|-------------------------------------|
| 04/1994-03/2004 | 9                  | 078.11 diagnosis OR<br>(078.10 / 078.19 diagnosis AND related<br>procedure) | 16 diagnosis and 12 procedure       |
| >03/2004        | 10                 | A630 diagnosis OR (B07 diagnosis AND<br>related procedure)                  | 25 diagnosis and 20 procedure       |

<sup>1</sup> All diagnostic and procedure fields were included.

Supplementary Table 4: **ICD-9-CM procedure codes used to assist in the identification of a male with anogenital warts** [1]

| <b>Code</b> | <b>Description</b>                                              |
|-------------|-----------------------------------------------------------------|
| 48.82       | Excision of perirectal tissue                                   |
| 49.04       | Other excision of perianal tissue                               |
| 49.3        | Local excision or destruction of other lesion or tissue of anus |
| 58.3        | Excision or destruction of lesion or tissue of urethra          |
| 61.3        | Excision or destruction of lesion or tissue of scrotum          |
| 64.2        | Local excision or destruction of lesion of penis                |

Supplementary Table 5: **ICD-10 procedure codes used to assist in the identification of a male with anogenital warts** [1]

| <b>Code</b>   | <b>Description</b>                                         |
|---------------|------------------------------------------------------------|
| 1.NT.59.CA.GX | Destruction anus using per orifice approach and device NEC |
| 1.PQ.59.LA.GX | Destruction urethra using open approach and device NEC     |
| 1.RY.87.LA    | Excision, partial perineum                                 |

Supplementary Table 6: **Tariff codes for treatment of anogenital warts used to assist in the identification of a male with anogenital warts** [1]

| <b>Code</b> | <b>Description</b>                                                                                |
|-------------|---------------------------------------------------------------------------------------------------|
| 0253        | Excision & simple closure – single lesion, any location                                           |
| 0254        | Excision & simple closure – each additional lesion to a maximum of four                           |
| 0255        | Excision & closure – multiple lesions, extensive                                                  |
| 0397        | Laser vaporization, other than face, one lesion                                                   |
| 0398        | Laser vaporization, other than face, two lesions                                                  |
| 0399        | Laser vaporization, other than face, three or more lesions                                        |
| 0401        | Cautery (electro, chemo, or simple surgical excision, one lesion) elsewhere                       |
| 0402        | Warts & fibrocyanous tags - simple                                                                |
| 0404        | Cryocautery, etc., of benign lesion of skin, etc., second lesion                                  |
| 0405        | Cryocautery, etc., of benign lesion of skin, etc., subsequent lesions (each)                      |
| 0406        | Cryocautery, etc., of benign lesion of skin, etc., complicated lesions                            |
| 3300        | Rectum, villous papilloma of rectum, extensive, local excision                                    |
| 3301        | Rectum, unlisted or unusually complicated                                                         |
| 3311        | Rectum, proctosigmoidoscopy                                                                       |
| 3315        | Rectum, proctosigmoidoscopy with removal of polyp or papilloma, single                            |
| 3317        | Rectum, proctosigmoidoscopy with removal of polyp or papilloma, multiple                          |
| 3429        | Anus, unlisted or unusually complicated                                                           |
| 3994        | Urethroscopy, therapeutic, polyps, urethral, excision of fulguration with or without urethroscopy |
| 4000        | Urethra, urethroscopy, diagnostic, initial or subsequent                                          |
| 4221        | Scrotum, skin lesion, local excision                                                              |
| 4229        | Scrotum, unlisted or unusually complicated                                                        |
| 8501        | Office visits, regional, history and examination                                                  |
| 8502        | Office visits, complete or extensive re-examination for same illness                              |
| 8507        | Office visits, subsequent visit                                                                   |

Supplementary Table 7 **Fraction of HPV-related diseases attributable to the HPV types included in different HPV vaccines [2]**

| <b>HPV-related disease</b>                  | <b>Bivalent<sup>1</sup></b> | <b>Quadrivalent<sup>2</sup></b> | <b>Nonavalent<sup>3</sup></b> |
|---------------------------------------------|-----------------------------|---------------------------------|-------------------------------|
| Anogenital warts                            | 0%                          | 90%                             | 90%                           |
| Carcinoma <i>in situ</i> of the anus        | 79%                         | 79%                             | 83%                           |
| Carcinoma <i>in situ</i> of the oral cavity | 22%                         | 22%                             | 26%                           |
| Carcinoma <i>in situ</i> of the oropharynx  | 63%                         | 63%                             | 68%                           |
| Carcinoma <i>in situ</i> of the penis       | 48%                         | 48%                             | 57%                           |
| Invasive cancer of the anus                 | 79%                         | 79%                             | 83%                           |
| Invasive cancer of the oral cavity          | 22%                         | 22%                             | 26%                           |
| Invasive cancer of the oropharynx           | 63%                         | 63%                             | 68%                           |
| Invasive cancer of the penis                | 48%                         | 48%                             | 57%                           |

<sup>1</sup> Includes HPV type 16 and 18; <sup>2</sup> Includes HPV-type 6, 11, 16, and 18; <sup>3</sup> Includes HPV-type 6, 11, 16, 18, 31, 33, 45, 52, and 58

Supplementary Table 8 **Overall fraction of HPV-related diseases attributable to any HPV type**

| <b>HPV-related disease</b>                  | <b>Volesky et al. [3]</b> | <b>Saraiya et al. [2]</b> |
|---------------------------------------------|---------------------------|---------------------------|
| Anogenital warts                            | 100%                      | 100%                      |
| Carcinoma <i>in situ</i> of the anus        | 88%                       | 89%                       |
| Carcinoma <i>in situ</i> of the oral cavity | 8%                        | 33%                       |
| Carcinoma <i>in situ</i> of the oropharynx  | 60%                       | 72%                       |
| Carcinoma <i>in situ</i> of the penis       | 39%                       | 63%                       |
| Invasive cancer of the anus                 | 88%                       | 89%                       |
| Invasive cancer of the oral cavity          | 8%                        | 33%                       |
| Invasive cancer of the oropharynx           | 60%                       | 72%                       |
| Invasive cancer of the penis                | 39%                       | 63%                       |

### Incidence Rates

Supplementary Table 9 **Age-standardized incidence rates (95% confidence interval) per 100,000 person-years of HPV-related diseases among Manitoba males by regional health authority of residence (1997 - 2016).**

| Regional health authority of residence | Diseases             |                      |                      |                      |                      |                      |
|----------------------------------------|----------------------|----------------------|----------------------|----------------------|----------------------|----------------------|
|                                        | Anogenital warts     | All CIS              | CA anus              | CA oral cavity       | CA oropharynx        | CA penis             |
| Winnipeg                               | 174 (170-177)        | 1.4 (1.0-1.7)        | 1.0 (0.7-1.3)        | 5.6 (5.0-6.3)        | 6.9 (6.2-7.7)        | 1.4 (1.0-1.7)        |
| Interlake-Eastern                      | 105 (98-111)         | 1.0 (0.4-1.6)        | 0.8 (0.2-1.3)        | 4.8 (3.4-6.1)        | 6.1 (4.6-7.7)        | 1.6 (0.8-2.4)        |
| Northern                               | 59 (53-65)           | 2.1 (0.4-3.8)        | 1.1 (0.0-2.5)        | 3.6 (1.5-5.6)        | 6.2 (3.5-9.0)        | 2.5 (0.7-4.3)        |
| Southern                               | 91 (86-96)           | 0.5 (0.1-0.9)        | 0.4 (0.0-0.7)        | 4.5 (3.2-5.7)        | 3.8 (2.7-4.9)        | 1.3 (0.6-1.9)        |
| Prairie Mountain                       | 113 (108-119)        | 0.5 (0.1-0.9)        | 0.6 (0.2-1.0)        | 4.0 (2.9-5.0)        | 5.3 (4.1-6.6)        | 2.9 (2.0-3.8)        |
| Public Trustee/In CFS care             | 70 (41-98)           | 1.5 (0.0-4.4)        | 0.0 (0.0-0.0)        | 13.4 (3.8-23.1)      | 9.3 (0.0-19.8)       | 3.0 (0.0-7.2)        |
| <b>Overall</b>                         | <b>141 (139-143)</b> | <b>1.1 (0.9-1.3)</b> | <b>0.8 (0.6-1.0)</b> | <b>5.1 (4.6-5.6)</b> | <b>6.2 (5.7-6.7)</b> | <b>1.7 (1.4-2.0)</b> |

CA: Invasive cancer, CIS: Carcinoma *in situ*

Supplementary Table 10 **Age-standardized incidence rates (95% confidence interval) per 100,000 person-years of HPV-related diseases among Manitoba males by Winnipeg region of residence (1997 - 2016).**

| Winnipeg region of residence | Diseases             |                      |                      |                      |                      |                      |
|------------------------------|----------------------|----------------------|----------------------|----------------------|----------------------|----------------------|
|                              | Anogenital warts     | All CIS              | CA anus              | CA oral cavity       | CA oropharynx        | CA penis             |
| Northern suburbs             | 154 (149-160)        | 1.2 (0.7-1.7)        | 0.7 (0.3-1.2)        | 4.3 (3.3-5.4)        | 6.6 (5.3-7.9)        | 1.0 (0.5-1.5)        |
| Inner city                   | 174 (166-181)        | 1.9 (0.9-3.0)        | 1.5 (0.7-2.4)        | 7.5 (5.4-9.5)        | 7.5 (5.6-9.5)        | 2.8 (1.5-4.1)        |
| Southern suburbs             | 188 (183-192)        | 1.3 (0.9-1.8)        | 1.0 (0.6-1.4)        | 5.9 (5.0-6.9)        | 7.0 (6.0-8.0)        | 1.2 (0.8-1.6)        |
| <b>Overall</b>               | <b>174 (171-177)</b> | <b>1.4 (1.0-1.7)</b> | <b>1.0 (0.7-1.3)</b> | <b>5.6 (5.0-6.3)</b> | <b>7.0 (6.2-7.7)</b> | <b>1.4 (1.0-1.7)</b> |

CA: Invasive cancer, CIS: Carcinoma *in situ*



Supplementary Table 11 **Age-standardized incidence rates (95% confidence interval) per 100,000 person-years of HPV-related diseases among Manitoba males by year of diagnosis.**

| Year of diagnosis | Diseases             |                      |                      |                      |                      |                      |
|-------------------|----------------------|----------------------|----------------------|----------------------|----------------------|----------------------|
|                   | Anogenital warts     | All CIS              | CA anus              | CA oral cavity       | CA oropharynx        | CA penis             |
| 1997              | 144 (134-154)        | 0.5 (0.0-1.2)        | 0.5 (0.0-1.2)        | 6.4 (3.7-9.0)        | 4.9 (2.6-7.1)        | 0.4 (0.0-1.1)        |
| 1998              | 121 (112-131)        | 0.7 (0.0-1.6)        | 0.8 (0.0-1.7)        | 5.8 (3.4-8.3)        | 4.6 (2.4-6.8)        | 1.4 (0.2-2.7)        |
| 1999              | 110 (101-119)        | 0.5 (0.0-1.1)        | 0.7 (0.0-1.5)        | 5.1 (2.8-7.4)        | 3.7 (1.8-5.6)        | 1.7 (0.4-3.0)        |
| 2000              | 117 (108-126)        | 1.2 (0.1-2.3)        | 0.6 (0.0-1.3)        | 5.2 (3.0-7.5)        | 5.1 (2.9-7.3)        | 1.6 (0.4-2.8)        |
| 2001              | 113 (104-122)        | 0.8 (0.0-1.7)        | 0.3 (0.0-0.8)        | 5.5 (3.2-7.8)        | 5.7 (3.4-8.1)        | 2.2 (0.7-3.6)        |
| 2002              | 131 (121-140)        | 2.1 (0.6-3.6)        | 0.7 (0.0-1.6)        | 5.3 (3.0-7.6)        | 5.9 (3.5-8.3)        | 1.3 (0.2-2.5)        |
| 2003              | 135 (125-144)        | 0.5 (0.0-1.2)        | 0.5 (0.0-1.2)        | 4.2 (2.2-6.3)        | 6.0 (3.6-8.4)        | 1.7 (0.4-3.0)        |
| 2004              | 141 (130-151)        | 2.3 (0.9-3.8)        | 1.0 (0.1-1.9)        | 4.5 (2.5-6.6)        | 6.1 (3.8-8.5)        | 1.2 (0.1-2.2)        |
| 2005              | 148 (138-158)        | 1.0 (0.0-2.0)        | 0.6 (0.0-1.3)        | 4.7 (2.6-6.8)        | 5.0 (2.9-7.1)        | 1.0 (0.0-2.0)        |
| 2006              | 143 (133-153)        | 0.7 (0.0-1.5)        | 0.7 (0.0-1.5)        | 5.3 (3.1-7.5)        | 6.0 (3.7-8.3)        | 0.8 (0.0-1.6)        |
| 2007              | 135 (125-145)        | 1.3 (0.3-2.4)        | 1.4 (0.3-2.5)        | 4.7 (2.7-6.8)        | 7.2 (4.7-9.8)        | 2.2 (0.8-3.7)        |
| 2008              | 152 (142-163)        | 0.5 (0.0-1.1)        | 1.2 (0.1-2.2)        | 5.2 (3.1-7.4)        | 6.4 (4.1-8.8)        | 2.7 (1.2-4.3)        |
| 2009              | 153 (143-163)        | 1.5 (0.4-2.6)        | 0.8 (0.0-1.6)        | 5.4 (3.3-7.6)        | 6.2 (3.9-8.5)        | 1.4 (0.3-2.5)        |
| 2010              | 163 (152-173)        | 1.1 (0.1-2.0)        | 0.9 (0.0-1.7)        | 6.5 (4.2-8.9)        | 6.7 (4.3-9.1)        | 0.5 (0.0-1.1)        |
| 2011              | 160 (150-171)        | 1.0 (0.1-1.9)        | 1.1 (0.1-2.0)        | 5.7 (3.5-7.8)        | 8.6 (6.0-11.2)       | 1.1 (0.1-2.1)        |
| 2012              | 158 (148-168)        | 0.6 (0.0-1.3)        | 0.4 (0.0-0.9)        | 5.5 (3.4-7.6)        | 5.5 (3.4-7.6)        | 1.1 (0.1-2.0)        |
| 2013              | 139 (129-148)        | 1.1 (0.2-2.0)        | 1.4 (0.4-2.4)        | 3.4 (1.8-5.1)        | 6.4 (4.2-8.6)        | 2.0 (0.8-3.2)        |
| 2014              | 150 (140-160)        | 1.3 (0.3-2.2)        | 1.2 (0.2-2.1)        | 3.4 (1.8-5.0)        | 6.4 (4.2-8.6)        | 3.0 (1.5-4.5)        |
| 2015              | 149 (140-159)        | 1.1 (0.2-2.0)        | 1.1 (0.2-2.0)        | 6.3 (4.1-8.4)        | 6.8 (4.6-9.0)        | 3.9 (2.2-5.6)        |
| 2016              | 144 (135-154)        | 2.0 (0.8-3.2)        | 0.4 (0.0-0.9)        | 4.1 (2.4-5.8)        | 7.8 (5.4-10.1)       | 1.7 (0.6-2.8)        |
| <b>Overall</b>    | <b>141 (139-143)</b> | <b>1.1 (0.9-1.3)</b> | <b>0.8 (0.6-1.0)</b> | <b>5.1 (4.6-5.6)</b> | <b>6.2 (5.7-6.7)</b> | <b>1.7 (1.4-2.0)</b> |

CA: Invasive cancer, CIS: Carcinoma *in situ*

Supplementary Table 12 **Crude incidence rates (95% confidence interval) per 100,000 person-years of anogenital warts among Manitoba males by age group and regional health authority and Winnipeg region of residence (1997 - 2016).**

| Region                     | Age group   |               |               |              |            | Overall       |
|----------------------------|-------------|---------------|---------------|--------------|------------|---------------|
|                            | 9-17        | 18-30         | 31-50         | 51-64        | ≥65        |               |
| Winnipeg                   | 24 (21-28)  | 439 (427-451) | 212 (205-218) | 82 (76-87)   | 38 (33-42) | 188 (185-192) |
| Northern suburbs           | 21 (16-28)  | 396 (377-416) | 187 (177-198) | 69 (60-78)   | 34 (27-42) | 166 (160-172) |
| Inner city                 | 27 (19-38)  | 397 (372-423) | 220 (205-235) | 101 (86-117) | 43 (32-58) | 199 (190-208) |
| Southern suburbs           | 25 (21-31)  | 486 (468-504) | 226 (216-235) | 84 (77-92)   | 38 (33-44) | 200 (195-205) |
| Interlake-Eastern          | 15 (10-23)  | 277 (254-302) | 122 (110-134) | 44 (36-54)   | 25 (18-33) | 102 (96-109)  |
| Northern                   | 15 (9-24)   | 140 (122-161) | 64 (54-77)    | 33 (23-48)   | 23 (11-44) | 65 (59-72)    |
| Southern                   | 14 (10-19)  | 249 (232-268) | 103 (94-113)  | 33 (26-41)   | 23 (16-30) | 96 (91-101)   |
| Prairie Mountain           | 23 (17-30)  | 357 (335-380) | 102 (92-112)  | 41 (34-49)   | 21 (15-27) | 114 (108-119) |
| Public Trustee/In CFS care | 64 (32-114) | 226 (117-394) | 35 (7-102)    | 13 (0-73)    | 34 (9-88)  | 61 (42-87)    |
| Overall                    | 21 (19-24)  | 367 (359-375) | 167 (162-171) | 63 (59-66)   | 31 (28-34) | 149 (147-152) |

**Incidence Rates by age and year of diagnosis**

Supplementary Table 13 **Crude incidence rates (95% confidence interval) per 100,000 person-years of anogenital warts among Manitoba males by age group and year of diagnosis.**

| Age group      | Year of diagnosis    |                      |                      |                      |                      |
|----------------|----------------------|----------------------|----------------------|----------------------|----------------------|
|                | 1997-2001            | 2002-2006            | 2007-2011            | 2012-2016            | Overall              |
| 9-17           | 19 (15-24)           | 22 (17-27)           | 20 (16-25)           | 23 (19-29)           | 21 (19-24)           |
| 18-30          | 314 (299-330)        | 370 (354-387)        | 411 (394-428)        | 370 (355-386)        | 367 (359-375)        |
| 31-50          | 150 (142-158)        | 166 (157-174)        | 172 (163-181)        | 180 (171-189)        | 167 (163-171)        |
| 51-64          | 49 (42-57)           | 55 (48-63)           | 70 (63-78)           | 71 (64-78)           | 63 (59-67)           |
| ≥65            | 24 (19-30)           | 30 (25-37)           | 32 (27-39)           | 35 (30-41)           | 31 (28-34)           |
| <b>Overall</b> | <b>131 (127-136)</b> | <b>148 (143-152)</b> | <b>160 (155-165)</b> | <b>156 (152-161)</b> | <b>149 (147-152)</b> |

Supplementary Table 14 **Crude incidence rates (95% confidence interval) per 100,000 person-years of all HPV-related carcinoma *in situ* among Manitoba males by age group and year of diagnosis.**

| Age group      | Year of diagnosis    |                      |                      |                      |                      |
|----------------|----------------------|----------------------|----------------------|----------------------|----------------------|
|                | 1997-2001            | 2002-2006            | 2007-2011            | 2012-2016            | Overall              |
| 9-17           | 0.0 (0.0-1.0)        | 0.0 (0.0-0.9)        | 0.0 (0.0-1.0)        | 0.0 (0.0-1.0)        | 0.0 (0.0-0.2)        |
| 18-30          | 0.4 (0.0-1.4)        | 0.2 (0.0-1.1)        | 0.4 (0.0-1.3)        | 0.5 (0.1-1.4)        | 0.4 (0.2-0.7)        |
| 31-50          | 0.3 (0.1-1.0)        | 0.2 (0.0-0.8)        | 0.6 (0.2-1.4)        | 1.0 (0.5-2.0)        | 0.6 (0.3-0.9)        |
| 51-64          | 1.6 (0.6-3.5)        | 1.8 (0.8-3.5)        | 1.1 (0.4-2.5)        | 1.9 (0.9-3.3)        | 1.6 (1.1-2.3)        |
| ≥65            | 1.2 (0.3-3.1)        | 4.7 (2.7-7.7)        | 3.3 (1.7-5.8)        | 2.4 (1.1-4.3)        | 2.9 (2.1-3.9)        |
| <b>Overall</b> | <b>0.6 (0.3-1.0)</b> | <b>1.1 (0.7-1.5)</b> | <b>0.9 (0.6-1.4)</b> | <b>1.2 (0.8-1.6)</b> | <b>0.9 (0.8-1.2)</b> |

Supplementary Table 15 **Crude incidence rates (95% confidence interval) per 100,000 person-years of all HPV-related invasive cancers among Manitoba males by age group and year of diagnosis.**

| Age group | Year of diagnosis |               |               |               |               |
|-----------|-------------------|---------------|---------------|---------------|---------------|
|           | 1997-2001         | 2002-2006     | 2007-2011     | 2012-2016     | Overall       |
| 9-17      | 0.0 (0.0-1.0)     | 0.0 (0.0-0.9) | 0.0 (0.0-1.0) | 0.0 (0.0-1.0) | 0.0 (0.0-0.2) |

|                |                        |                        |                         |                         |                         |
|----------------|------------------------|------------------------|-------------------------|-------------------------|-------------------------|
| 18-30          | 0.4 (0.0-1.4)          | 0.4 (0.0-1.4)          | 0.2 (0.0-1.0)           | 0.3 (0.0-1.2)           | 0.3 (0.1-0.7)           |
| 31-50          | 7.0 (5.4-9.0)          | 5.5 (4.0-7.3)          | 4.8 (3.5-6.6)           | 5.7 (4.2-7.5)           | 5.8 (5.0-6.6)           |
| 51-64          | 22.5 (18.0-27.8)       | 21.5 (17.4-26.3)       | 31.1 (26.5-36.3)        | 26.8 (22.8-31.3)        | 25.9 (23.7-28.3)        |
| ≥65            | 30.1 (24.4-36.6)       | 34.6 (28.6-41.5)       | 38.7 (32.6-45.7)        | 38.0 (32.4-44.4)        | 35.6 (32.6-38.8)        |
| <b>Overall</b> | <b>10.0 (8.8-11.3)</b> | <b>10.3 (9.1-11.6)</b> | <b>13.0 (11.7-14.4)</b> | <b>12.9 (11.6-14.3)</b> | <b>11.6 (11.0-12.3)</b> |

Supplementary Table 16 **Crude incidence rates (95% confidence interval) per 100,000 person-years of invasive cancer of the anus among Manitoba males by age group and year of diagnosis.**

| Age group      | Year of diagnosis    |                      |                      |                      |                      |
|----------------|----------------------|----------------------|----------------------|----------------------|----------------------|
|                | 1997-2001            | 2002-2006            | 2007-2011            | 2012-2016            | Overall              |
| 9-17           | 0.0 (0.0-1.0)        | 0.0 (0.0-0.9)        | 0.0 (0.0-1.0)        | 0.0 (0.0-1.0)        | 0.0 (0.0-0.2)        |
| 18-30          | 0.0 (0.0-0.7)        | 0.2 (0.0-1.1)        | 0.0 (0.0-0.7)        | 0.0 (0.0-0.6)        | 0.0 (0.0-0.3)        |
| 31-50          | 0.3 (0.1-1.0)        | 0.7 (0.3-1.5)        | 0.2 (0.0-0.9)        | 0.2 (0.0-0.8)        | 0.4 (0.2-0.6)        |
| 51-64          | 1.3 (0.4-3.1)        | 0.9 (0.2-2.3)        | 2.5 (1.3-4.2)        | 2.4 (1.3-4.0)        | 1.9 (1.3-2.6)        |
| ≥65            | 0.9 (0.2-2.7)        | 1.5 (0.5-3.5)        | 2.5 (1.1-4.7)        | 1.7 (0.7-3.4)        | 1.6 (1.1-2.5)        |
| <b>Overall</b> | <b>0.4 (0.2-0.8)</b> | <b>0.6 (0.4-1.0)</b> | <b>0.9 (0.6-1.3)</b> | <b>0.8 (0.5-1.2)</b> | <b>0.7 (0.6-0.9)</b> |

Supplementary Table 17 **Crude incidence rates (95% confidence interval) per 100,000 person-years of invasive cancer of the oral cavity among Manitoba males by age group and year of diagnosis.**

| Age group      | Year of diagnosis    |                      |                      |                      |                      |
|----------------|----------------------|----------------------|----------------------|----------------------|----------------------|
|                | 1997-2001            | 2002-2006            | 2007-2011            | 2012-2016            | Overall              |
| 9-17           | 0.0 (0.0-1.0)        | 0.0 (0.0-0.9)        | 0.0 (0.0-1.0)        | 0.0 (0.0-1.0)        | 0.0 (0.0-0.2)        |
| 18-30          | 0.0 (0.0-0.7)        | 0.2 (0.0-1.1)        | 0.2 (0.0-1.0)        | 0.2 (0.0-0.9)        | 0.1 (0.0-0.4)        |
| 31-50          | 2.9 (1.9-4.2)        | 1.6 (0.9-2.7)        | 1.3 (0.6-2.3)        | 2.3 (1.4-3.6)        | 2.0 (1.6-2.6)        |
| 51-64          | 9.8 (6.9-13.5)       | 9.2 (6.6-12.5)       | 11.1 (8.4-14.3)      | 6.6 (4.7-9.0)        | 9.0 (7.7-10.5)       |
| ≥65            | 14.6 (10.7-19.3)     | 13.0 (9.5-17.5)      | 15.1 (11.4-19.7)     | 13.5 (10.2-17.4)     | 14.0 (12.2-16.1)     |
| <b>Overall</b> | <b>4.5 (3.7-5.4)</b> | <b>3.9 (3.2-4.8)</b> | <b>4.7 (3.9-5.6)</b> | <b>4.1 (3.4-4.9)</b> | <b>4.3 (3.9-4.7)</b> |

Supplementary Table 18 **Crude incidence rates (95% confidence interval) per 100,000 person-years of invasive cancer of the oropharynx among Manitoba males by age group and year of diagnosis.**

| Age group | Year of diagnosis |               |               |               |               |
|-----------|-------------------|---------------|---------------|---------------|---------------|
|           | 1997-2001         | 2002-2006     | 2007-2011     | 2012-2016     | Overall       |
| 9-17      | 0.0 (0.0-1.0)     | 0.0 (0.0-0.9) | 0.0 (0.0-1.0) | 0.0 (0.0-1.0) | 0.0 (0.0-0.2) |

|                |                      |                      |                      |                      |                      |
|----------------|----------------------|----------------------|----------------------|----------------------|----------------------|
| 18-30          | 0.0 (0.0-0.7)        | 0.0 (0.0-0.7)        | 0.0 (0.0-0.7)        | 0.0 (0.0-0.6)        | 0.0 (0.0-0.2)        |
| 31-50          | 3.0 (1.9-4.4)        | 2.9 (1.9-4.3)        | 3.1 (2.0-4.5)        | 2.7 (1.7-4.0)        | 2.9 (2.4-3.5)        |
| 51-64          | 9.3 (6.5-12.9)       | 10.8 (7.9-14.3)      | 16.4 (13.1-20.3)     | 15.4 (12.4-18.9)     | 13.4 (11.8-15.2)     |
| ≥65            | 10.6 (7.4-14.8)      | 14.5 (10.7-19.2)     | 14.0 (10.4-18.4)     | 13.5 (10.2-17.4)     | 13.2 (11.4-15.2)     |
| <b>Overall</b> | <b>3.9 (3.1-4.7)</b> | <b>4.8 (4.0-5.7)</b> | <b>6.1 (5.2-7.1)</b> | <b>6.0 (5.1-6.9)</b> | <b>5.2 (4.8-5.7)</b> |

Supplementary Table 19 **Crude incidence rates (95% confidence interval) per 100,000 person-years of invasive cancer of the penis among Manitoba males by age group and year of diagnosis.**

| <b>Age group</b> | <b>Year of diagnosis</b> |                      |                      |                      |                      |
|------------------|--------------------------|----------------------|----------------------|----------------------|----------------------|
|                  | <b>1997-2001</b>         | <b>2002-2006</b>     | <b>2007-2011</b>     | <b>2012-2016</b>     | <b>Overall</b>       |
| 9-17             | 0.0 (0.0-1.0)            | 0.0 (0.0-0.9)        | 0.0 (0.0-1.0)        | 0.0 (0.0-1.0)        | 0.0 (0.0-0.2)        |
| 18-30            | 0.4 (0.0-1.4)            | 0.0 (0.0-0.7)        | 0.0 (0.0-0.7)        | 0.2 (0.0-0.9)        | 0.1 (0.0-0.4)        |
| 31-50            | 0.8 (0.3-1.7)            | 0.2 (0.0-0.8)        | 0.2 (0.0-0.9)        | 0.5 (0.1-1.2)        | 0.4 (0.2-0.7)        |
| 51-64            | 2.1 (0.9-4.2)            | 0.7 (0.1-2.0)        | 1.1 (0.4-2.5)        | 2.4 (1.3-4.0)        | 1.6 (1.1-2.3)        |
| ≥65              | 3.9 (2.1-6.7)            | 5.6 (3.4-8.8)        | 7.1 (4.7-10.5)       | 9.4 (6.7-12.9)       | 6.7 (5.5-8.2)        |
| <b>Overall</b>   | <b>1.2 (0.8-1.7)</b>     | <b>0.9 (0.6-1.4)</b> | <b>1.3 (0.9-1.8)</b> | <b>2.1 (1.6-2.7)</b> | <b>1.4 (1.2-1.6)</b> |

**Incidence Rates by birth year cohort and year of diagnosis**

Supplementary Table 20 **Crude incidence rates (95% confidence interval) per 100,000 person-years of anogenital warts among Manitoba males by birth year and year of diagnosis.**

| Birth year     | Year of diagnosis    |                      |                      |                      | Overall              |
|----------------|----------------------|----------------------|----------------------|----------------------|----------------------|
|                | 1997-2001            | 2002-2006            | 2007-2011            | 2012-2016            |                      |
| 1920-1929      | 25 (18-34)           | 25 (17-35)           | 20 (12-33)           | 12 (5-27)            | 22 (18-28)           |
| 1930-1939      | 38 (30-47)           | 39 (31-50)           | 37 (29-48)           | 22 (15-32)           | 35 (31-40)           |
| 1940-1949      | 59 (51-68)           | 55 (47-64)           | 48 (41-57)           | 45 (37-54)           | 52 (48-57)           |
| 1950-1959      | 106 (97-117)         | 84 (76-93)           | 80 (72-89)           | 65 (57-73)           | 84 (80-89)           |
| 1960-1969      | 226 (213-241)        | 174 (162-186)        | 123 (112-133)        | 110 (101-120)        | 158 (152-164)        |
| 1970-1979      | 332 (314-351)        | 342 (324-361)        | 274 (258-291)        | 180 (168-193)        | 280 (272-288)        |
| 1980-1989      | 40 (34-47)           | 253 (238-269)        | 439 (419-459)        | 357 (340-375)        | 276 (268-284)        |
| 1990-1999      | 15 (6-33)            | 5 (2-8)              | 61 (54-69)           | 248 (234-262)        | 123 (117-130)        |
| <b>Overall</b> | <b>131 (127-136)</b> | <b>148 (143-152)</b> | <b>160 (155-165)</b> | <b>156 (152-161)</b> | <b>149 (147-152)</b> |

Supplementary Table 21 **Crude incidence rates (95% confidence interval) per 100,000 person-years of all HPV-related carcinoma *in situ* among Manitoba males by birth year and year of diagnosis.**

| Birth year     | Year of diagnosis    |                      |                      |                      | Overall              |
|----------------|----------------------|----------------------|----------------------|----------------------|----------------------|
|                | 1997-2001            | 2002-2006            | 2007-2011            | 2012-2016            |                      |
| 1920-1929      | 1.9 (0.4-5.5)        | 4.9 (1.8-10.7)       | 2.4 (0.3-8.6)        | 2.1 (0.1-11.5)       | 2.9 (1.5-5.1)        |
| 1930-1939      | 1.4 (0.3-4.2)        | 4.8 (2.2-9.1)        | 4.4 (1.8-9.0)        | 3.1 (0.8-7.9)        | 3.3 (2.1-5.0)        |
| 1940-1949      | 1.0 (0.2-2.8)        | 1.3 (0.4-3.4)        | 1.4 (0.4-3.7)        | 1.9 (0.6-4.5)        | 1.4 (0.8-2.3)        |
| 1950-1959      | 0.5 (0.1-1.7)        | 0.7 (0.1-2.1)        | 1.4 (0.5-3.1)        | 2.2 (1.0-4.2)        | 1.2 (0.7-1.8)        |
| 1960-1969      | 0.2 (0.0-1.3)        | 0.2 (0.0-1.3)        | 0.5 (0.1-1.6)        | 0.9 (0.2-2.3)        | 0.5 (0.2-0.9)        |
| 1970-1979      | 0.5 (0.1-1.8)        | 0.3 (0.0-1.5)        | 0.5 (0.1-1.8)        | 0.5 (0.1-1.7)        | 0.4 (0.2-0.9)        |
| 1980-1989      | 0.0 (0.0-0.9)        | 0.2 (0.0-1.3)        | 0.5 (0.1-1.7)        | 1.5 (0.6-3.2)        | 0.6 (0.3-1.1)        |
| 1990-1999      | 0.0 (0.0-9.3)        | 0.0 (0.0-1.5)        | 0.0 (0.0-0.9)        | 0.2 (0.0-1.2)        | 0.1 (0.0-0.5)        |
| <b>Overall</b> | <b>0.6 (0.3-1.0)</b> | <b>1.1 (0.7-1.5)</b> | <b>0.9 (0.6-1.4)</b> | <b>1.2 (0.8-1.6)</b> | <b>0.9 (0.8-1.2)</b> |



Supplementary Table 22 **Crude incidence rates (95% confidence interval) per 100,000 person-years of all HPV-related invasive cancers among Manitoba males by birth year and year of diagnosis.**

| Birth year     | Year of diagnosis      |                        |                         |                         | Overall                 |
|----------------|------------------------|------------------------|-------------------------|-------------------------|-------------------------|
|                | 1997-2001              | 2002-2006              | 2007-2011               | 2012-2016               |                         |
| 1920-1929      | 27.6 (20.0-37.0)       | 37.6 (27.6-50.2)       | 31.1 (20.3-45.5)        | 24.8 (12.8-43.3)        | 30.9 (25.8-36.8)        |
| 1930-1939      | 25.2 (18.9-32.9)       | 32.5 (24.9-41.8)       | 38.6 (29.6-49.5)        | 32.4 (23.3-43.7)        | 31.7 (27.6-36.2)        |
| 1940-1949      | 20.1 (15.4-25.7)       | 23.8 (18.6-30.0)       | 43.9 (36.5-52.3)        | 41.6 (34.1-50.2)        | 31.7 (28.5-35.1)        |
| 1950-1959      | 12.0 (9.0-15.7)        | 13.1 (9.9-17.1)        | 22.1 (17.8-27.1)        | 32.3 (27.0-38.4)        | 19.7 (17.6-21.9)        |
| 1960-1969      | 0.7 (0.1-2.0)          | 3.2 (1.8-5.4)          | 6.3 (4.2-9.1)           | 12.0 (9.0-15.6)         | 5.6 (4.5-6.8)           |
| 1970-1979      | 0.5 (0.1-1.8)          | 1.3 (0.4-3.0)          | 2.0 (0.9-4.0)           | 3.6 (2.0-5.9)           | 1.9 (1.3-2.7)           |
| 1980-1989      | 0.0 (0.0-0.9)          | 0.0 (0.0-0.9)          | 0.2 (0.0-1.3)           | 1.8 (0.8-3.5)           | 0.5 (0.2-1.0)           |
| 1990-1999      | 0.0 (0.0-9.3)          | 0.0 (0.0-1.5)          | 0.0 (0.0-0.9)           | 0.2 (0.0-1.2)           | 0.1 (0.0-0.5)           |
| <b>Overall</b> | <b>10.0 (8.8-11.3)</b> | <b>10.3 (9.1-11.6)</b> | <b>13.0 (11.7-14.4)</b> | <b>12.9 (11.6-14.3)</b> | <b>11.6 (11.0-12.3)</b> |

Supplementary Table 23 **Crude incidence rates (95% confidence interval) per 100,000 person-years of invasive cancer of the anus among Manitoba males by birth year and year of diagnosis.**

| Birth year     | Year of diagnosis    |                      |                      |                      | Overall              |
|----------------|----------------------|----------------------|----------------------|----------------------|----------------------|
|                | 1997-2001            | 2002-2006            | 2007-2011            | 2012-2016            |                      |
| 1920-1929      | 0.6 (0.0-3.5)        | 3.3 (0.9-8.4)        | 1.2 (0.0-6.7)        | 0.0 (0.0-7.6)        | 1.4 (0.5-3.2)        |
| 1930-1939      | 1.9 (0.5-4.9)        | 0.5 (0.0-3.0)        | 3.7 (1.4-8.1)        | 2.3 (0.5-6.8)        | 2.0 (1.1-3.4)        |
| 1940-1949      | 0.6 (0.1-2.3)        | 1.0 (0.2-2.9)        | 2.5 (1.0-5.1)        | 1.6 (0.4-4.0)        | 1.4 (0.8-2.3)        |
| 1950-1959      | 0.7 (0.1-2.0)        | 0.5 (0.1-1.7)        | 1.9 (0.8-3.8)        | 3.0 (1.5-5.2)        | 1.5 (1.0-2.2)        |
| 1960-1969      | 0.0 (0.0-0.8)        | 0.9 (0.2-2.3)        | 0.2 (0.0-1.3)        | 0.7 (0.1-1.9)        | 0.5 (0.2-0.9)        |
| 1970-1979      | 0.0 (0.0-0.9)        | 0.5 (0.1-1.9)        | 0.3 (0.0-1.4)        | 0.0 (0.0-0.9)        | 0.2 (0.0-0.6)        |
| 1980-1989      | 0.0 (0.0-0.9)        | 0.0 (0.0-0.9)        | 0.0 (0.0-0.9)        | 0.2 (0.0-1.2)        | 0.1 (0.0-0.3)        |
| 1990-1999      | 0.0 (0.0-9.3)        | 0.0 (0.0-1.5)        | 0.0 (0.0-0.9)        | 0.0 (0.0-0.8)        | 0.0 (0.0-0.3)        |
| <b>Overall</b> | <b>0.4 (0.2-0.8)</b> | <b>0.6 (0.4-1.0)</b> | <b>0.9 (0.6-1.3)</b> | <b>0.8 (0.5-1.2)</b> | <b>0.7 (0.6-0.9)</b> |

Supplementary Table 24 **Crude incidence rates (95% confidence interval) per 100,000 person-years of invasive cancer of the oral cavity among Manitoba males by birth year and year of diagnosis.**

| Birth year     | Year of diagnosis    |                      |                      |                      | Overall              |
|----------------|----------------------|----------------------|----------------------|----------------------|----------------------|
|                | 1997-2001            | 2002-2006            | 2007-2011            | 2012-2016            |                      |
| 1920-1929      | 12.5 (7.7-19.3)      | 14.7 (8.7-23.3)      | 13.1 (6.6-23.5)      | 12.4 (4.6-27.0)      | 13.3 (10.0-17.3)     |
| 1930-1939      | 12.8 (8.4-18.7)      | 11.2 (6.9-17.1)      | 13.7 (8.6-20.8)      | 11.6 (6.5-19.1)      | 12.3 (9.9-15.3)      |
| 1940-1949      | 9.2 (6.2-13.3)       | 9.4 (6.2-13.5)       | 15.7 (11.4-21.1)     | 14.8 (10.4-20.3)     | 12.1 (10.2-14.3)     |
| 1950-1959      | 4.4 (2.6-6.8)        | 5.6 (3.6-8.4)        | 8.2 (5.7-11.4)       | 7.9 (5.4-11.2)       | 6.5 (5.3-7.8)        |
| 1960-1969      | 0.2 (0.0-1.3)        | 0.7 (0.1-2.0)        | 1.8 (0.8-3.6)        | 2.9 (1.5-4.9)        | 1.4 (0.9-2.1)        |
| 1970-1979      | 0.0 (0.0-0.9)        | 0.5 (0.1-1.9)        | 0.5 (0.1-1.8)        | 2.1 (1.0-4.1)        | 0.8 (0.4-1.4)        |
| 1980-1989      | 0.0 (0.0-0.9)        | 0.0 (0.0-0.9)        | 0.2 (0.0-1.3)        | 0.9 (0.2-2.2)        | 0.3 (0.1-0.7)        |
| 1990-1999      | 0.0 (0.0-9.3)        | 0.0 (0.0-1.5)        | 0.0 (0.0-0.9)        | 0.0 (0.0-0.8)        | 0.0 (0.0-0.3)        |
| <b>Overall</b> | <b>4.5 (3.7-5.4)</b> | <b>3.9 (3.2-4.8)</b> | <b>4.7 (3.9-5.6)</b> | <b>4.1 (3.4-4.9)</b> | <b>4.3 (3.9-4.7)</b> |

Supplementary Table 25 **Crude incidence rates (95% confidence interval) per 100,000 person-years of invasive cancer of the oropharynx among Manitoba males by birth year and year of diagnosis.**

| Birth year     | Year of diagnosis    |                      |                      |                      | Overall              |
|----------------|----------------------|----------------------|----------------------|----------------------|----------------------|
|                | 1997-2001            | 2002-2006            | 2007-2011            | 2012-2016            |                      |
| 1920-1929      | 13.2 (8.1-20.1)      | 11.5 (6.3-19.2)      | 9.6 (4.1-18.8)       | 4.1 (0.5-14.9)       | 10.9 (7.9-14.5)      |
| 1930-1939      | 7.6 (4.3-12.3)       | 17.6 (12.1-24.7)     | 13.1 (8.1-20.0)      | 6.2 (2.7-12.1)       | 11.3 (9.0-14.1)      |
| 1940-1949      | 8.6 (5.7-12.5)       | 12.4 (8.7-17.1)      | 22.5 (17.3-28.7)     | 17.1 (12.4-22.9)     | 14.9 (12.7-17.3)     |
| 1950-1959      | 5.3 (3.4-8.0)        | 6.6 (4.4-9.5)        | 11.3 (8.3-15.0)      | 18.8 (14.8-23.5)     | 10.3 (8.9-12.0)      |
| 1960-1969      | 0.5 (0.1-1.6)        | 1.4 (0.5-3.0)        | 4.1 (2.4-6.4)        | 7.5 (5.2-10.5)       | 3.4 (2.6-4.4)        |
| 1970-1979      | 0.0 (0.0-0.9)        | 0.3 (0.0-1.5)        | 1.3 (0.4-3.0)        | 1.2 (0.4-2.8)        | 0.7 (0.3-1.2)        |
| 1980-1989      | 0.0 (0.0-0.9)        | 0.0 (0.0-0.9)        | 0.0 (0.0-0.9)        | 0.4 (0.1-1.6)        | 0.1 (0.0-0.4)        |
| 1990-1999      | 0.0 (0.0-9.3)        | 0.0 (0.0-1.5)        | 0.0 (0.0-0.9)        | 0.0 (0.0-0.8)        | 0.0 (0.0-0.3)        |
| <b>Overall</b> | <b>3.9 (3.1-4.7)</b> | <b>4.8 (4.0-5.7)</b> | <b>6.1 (5.2-7.1)</b> | <b>6.0 (5.1-6.9)</b> | <b>5.2 (4.8-5.7)</b> |

Supplementary Table 26 **Crude incidence rates (95% confidence interval) per 100,000 person-years of invasive cancer of the penis among Manitoba males by birth year and year of diagnosis.**

| Birth year     | Year of diagnosis    |                      |                      |                      | Overall              |
|----------------|----------------------|----------------------|----------------------|----------------------|----------------------|
|                | 1997-2001            | 2002-2006            | 2007-2011            | 2012-2016            |                      |
| 1920-1929      | 1.3 (0.2-4.5)        | 8.2 (3.9-15.0)       | 7.2 (2.6-15.6)       | 8.3 (2.3-21.2)       | 5.3 (3.3-8.0)        |
| 1930-1939      | 2.8 (1.0-6.2)        | 3.2 (1.2-7.0)        | 8.1 (4.3-13.9)       | 12.3 (7.0-20.0)      | 6.0 (4.3-8.1)        |
| 1940-1949      | 1.6 (0.5-3.7)        | 1.0 (0.2-2.9)        | 3.2 (1.5-6.1)        | 8.2 (5.0-12.5)       | 3.3 (2.3-4.5)        |
| 1950-1959      | 1.6 (0.6-3.3)        | 0.5 (0.1-1.7)        | 0.7 (0.1-2.1)        | 2.7 (1.4-4.9)        | 1.4 (0.9-2.1)        |
| 1960-1969      | 0.0 (0.0-0.8)        | 0.2 (0.0-1.3)        | 0.2 (0.0-1.3)        | 0.9 (0.2-2.3)        | 0.3 (0.1-0.7)        |
| 1970-1979      | 0.5 (0.1-1.8)        | 0.0 (0.0-1.0)        | 0.0 (0.0-0.9)        | 0.2 (0.0-1.3)        | 0.2 (0.0-0.6)        |
| 1980-1989      | 0.0 (0.0-0.9)        | 0.0 (0.0-0.9)        | 0.0 (0.0-0.9)        | 0.2 (0.0-1.2)        | 0.1 (0.0-0.3)        |
| 1990-1999      | 0.0 (0.0-9.3)        | 0.0 (0.0-1.5)        | 0.0 (0.0-0.9)        | 0.2 (0.0-1.2)        | 0.1 (0.0-0.5)        |
| <b>Overall</b> | <b>1.2 (0.8-1.7)</b> | <b>0.9 (0.6-1.4)</b> | <b>1.3 (0.9-1.8)</b> | <b>2.1 (1.6-2.7)</b> | <b>1.4 (1.2-1.6)</b> |

**Incidence Rates by birth year cohort and age**

Supplementary Table 27 **Crude incidence rates (95% confidence interval) per 100,000 person-years of anogenital warts among Manitoba males by birth year and age group.**

| Birth year     | Age group         |                      |                      |                   |                   | Overall              |
|----------------|-------------------|----------------------|----------------------|-------------------|-------------------|----------------------|
|                | 9-17              | 18-30                | 31-50                | 51-64             | ≥65               |                      |
| 1920-1929      | n/a               | n/a                  | n/a                  | n/a               | 22 (18-28)        | 22 (18-28)           |
| 1930-1939      | n/a               | n/a                  | n/a                  | 44 (34-57)        | 33 (28-38)        | 35 (31-40)           |
| 1940-1949      | n/a               | n/a                  | 91 (69-119)          | 53 (48-59)        | 43 (37-51)        | 52 (48-57)           |
| 1950-1959      | n/a               | n/a                  | 102 (95-110)         | 68 (63-74)        | 52 (21-107)       | 84 (80-89)           |
| 1960-1969      | n/a               | 349 (304-399)        | 157 (151-164)        | 92 (79-108)       | n/a               | 158 (152-164)        |
| 1970-1979      | 172 (69-355)      | 354 (340-368)        | 223 (214-233)        | n/a               | n/a               | 280 (272-288)        |
| 1980-1989      | 28 (23-33)        | 392 (380-404)        | 289 (263-316)        | n/a               | n/a               | 276 (268-284)        |
| 1990-1999      | 20 (17-23)        | 328 (310-347)        | n/a                  | n/a               | n/a               | 123 (117-130)        |
| <b>Overall</b> | <b>21 (19-24)</b> | <b>367 (359-375)</b> | <b>167 (163-171)</b> | <b>63 (59-67)</b> | <b>31 (28-34)</b> | <b>149 (147-152)</b> |

Supplementary Table 28 **Crude incidence rates (95% confidence interval) per 100,000 person-years of all HPV-related carcinoma *in situ* among Manitoba males by birth year and age group.**

| Birth year     | Age group            |                      |                      |                      |                      | Overall              |
|----------------|----------------------|----------------------|----------------------|----------------------|----------------------|----------------------|
|                | 9-17                 | 18-30                | 31-50                | 51-64                | ≥65                  |                      |
| 1920-1929      | n/a                  | n/a                  | n/a                  | n/a                  | 2.9 (1.5-5.1)        | 2.9 (1.5-5.1)        |
| 1930-1939      | n/a                  | n/a                  | n/a                  | 2.9 (0.8-7.3)        | 3.5 (2.1-5.4)        | 3.3 (2.1-5.0)        |
| 1940-1949      | n/a                  | n/a                  | 0.0 (0.0-6.1)        | 1.1 (0.5-2.1)        | 2.3 (1.0-4.6)        | 1.4 (0.8-2.3)        |
| 1950-1959      | n/a                  | n/a                  | 0.4 (0.1-1.1)        | 1.9 (1.1-3.1)        | 0.0 (0.0-27.4)       | 1.2 (0.7-1.8)        |
| 1960-1969      | n/a                  | 0.0 (0.0-5.9)        | 0.4 (0.1-0.9)        | 1.2 (0.1-4.2)        | n/a                  | 0.5 (0.2-0.9)        |
| 1970-1979      | 0.0 (0.0-90.9)       | 0.3 (0.0-1.0)        | 0.6 (0.2-1.3)        | n/a                  | n/a                  | 0.4 (0.2-0.9)        |
| 1980-1989      | 0.0 (0.0-0.7)        | 0.5 (0.2-1.1)        | 3.1 (1.0-7.3)        | n/a                  | n/a                  | 0.6 (0.3-1.1)        |
| 1990-1999      | 0.0 (0.0-0.5)        | 0.3 (0.0-1.4)        | n/a                  | n/a                  | n/a                  | 0.1 (0.0-0.5)        |
| <b>Overall</b> | <b>0.0 (0.0-0.2)</b> | <b>0.4 (0.2-0.7)</b> | <b>0.6 (0.3-0.9)</b> | <b>1.6 (1.1-2.3)</b> | <b>2.9 (2.1-3.9)</b> | <b>0.9 (0.8-1.2)</b> |

Supplementary Table 29 **Crude incidence rates (95% confidence interval) per 100,000 person-years of all HPV-related invasive cancers among Manitoba males by birth year and age group.**

| Birth year     | Age group            |                      |                      |                         |                         | Overall                 |
|----------------|----------------------|----------------------|----------------------|-------------------------|-------------------------|-------------------------|
|                | 9-17                 | 18-30                | 31-50                | 51-64                   | ≥65                     |                         |
| 1920-1929      | n/a                  | n/a                  | n/a                  | n/a                     | 30.9 (25.8-36.8)        | 30.9 (25.8-36.8)        |
| 1930-1939      | n/a                  | n/a                  | n/a                  | 24.4 (16.9-34.1)        | 33.5 (28.9-38.7)        | 31.7 (27.6-36.2)        |
| 1940-1949      | n/a                  | n/a                  | 13.3 (5.7-26.2)      | 27.0 (23.4-31.0)        | 45.1 (38.2-52.8)        | 31.7 (28.5-35.1)        |
| 1950-1959      | n/a                  | n/a                  | 10.7 (8.6-13.3)      | 27.3 (23.9-31.0)        | 51.9 (20.9-107.0)       | 19.7 (17.6-21.9)        |
| 1960-1969      | n/a                  | 0.0 (0.0-5.9)        | 4.7 (3.7-5.9)        | 15.6 (10.3-22.7)        | n/a                     | 5.6 (4.5-6.8)           |
| 1970-1979      | 0.0 (0.0-90.9)       | 0.6 (0.2-1.5)        | 2.9 (1.9-4.3)        | n/a                     | n/a                     | 1.9 (1.3-2.7)           |
| 1980-1989      | 0.0 (0.0-0.7)        | 0.2 (0.0-0.7)        | 4.4 (1.8-9.0)        | n/a                     | n/a                     | 0.5 (0.2-1.0)           |
| 1990-1999      | 0.0 (0.0-0.5)        | 0.3 (0.0-1.4)        | n/a                  | n/a                     | n/a                     | 0.1 (0.0-0.5)           |
| <b>Overall</b> | <b>0.0 (0.0-0.2)</b> | <b>0.3 (0.1-0.7)</b> | <b>5.8 (5.0-6.6)</b> | <b>25.9 (23.7-28.3)</b> | <b>35.6 (32.6-38.8)</b> | <b>11.6 (11.0-12.3)</b> |

Supplementary Table 30 **Crude incidence rates (95% confidence interval) per 100,000 person-years of invasive cancer of the anus among Manitoba males by birth year and age group.**

| Birth year     | Age group            |                      |                      |                      |                      | Overall              |
|----------------|----------------------|----------------------|----------------------|----------------------|----------------------|----------------------|
|                | 9-17                 | 18-30                | 31-50                | 51-64                | ≥65                  |                      |
| 1920-1929      | n/a                  | n/a                  | n/a                  | n/a                  | 1.4 (0.5-3.2)        | 1.4 (0.5-3.2)        |
| 1930-1939      | n/a                  | n/a                  | n/a                  | 2.2 (0.4-6.3)        | 2.0 (1.0-3.6)        | 2.0 (1.1-3.4)        |
| 1940-1949      | n/a                  | n/a                  | 0.0 (0.0-6.1)        | 1.3 (0.6-2.5)        | 1.8 (0.6-3.8)        | 1.4 (0.8-2.3)        |
| 1950-1959      | n/a                  | n/a                  | 0.5 (0.1-1.3)        | 2.4 (1.5-3.7)        | 0.0 (0.0-27.4)       | 1.5 (1.0-2.2)        |
| 1960-1969      | n/a                  | 0.0 (0.0-5.9)        | 0.4 (0.1-0.9)        | 1.2 (0.1-4.2)        | n/a                  | 0.5 (0.2-0.9)        |
| 1970-1979      | 0.0 (0.0-90.9)       | 0.1 (0.0-0.8)        | 0.2 (0.0-0.8)        | n/a                  | n/a                  | 0.2 (0.0-0.6)        |
| 1980-1989      | 0.0 (0.0-0.7)        | 0.0 (0.0-0.4)        | 0.6 (0.0-3.5)        | n/a                  | n/a                  | 0.1 (0.0-0.3)        |
| 1990-1999      | 0.0 (0.0-0.5)        | 0.0 (0.0-0.9)        | n/a                  | n/a                  | n/a                  | 0.0 (0.0-0.3)        |
| <b>Overall</b> | <b>0.0 (0.0-0.2)</b> | <b>0.0 (0.0-0.3)</b> | <b>0.4 (0.2-0.6)</b> | <b>1.9 (1.3-2.6)</b> | <b>1.6 (1.1-2.5)</b> | <b>0.7 (0.6-0.9)</b> |

Supplementary Table 31 **Crude incidence rates (95% confidence interval) per 100,000 person-years of invasive cancer of the oral cavity among Manitoba males by birth year and age group.**

| Birth year     | Age group            |                      |                      |                       |                         | Overall              |
|----------------|----------------------|----------------------|----------------------|-----------------------|-------------------------|----------------------|
|                | 9-17                 | 18-30                | 31-50                | 51-64                 | ≥65                     |                      |
| 1920-1929      | n/a                  | n/a                  | n/a                  | n/a                   | 13.3 (10.0-17.3)        | 13.3 (10.0-17.3)     |
| 1930-1939      | n/a                  | n/a                  | n/a                  | 11.5 (6.6-18.6)       | 12.6 (9.8-15.9)         | 12.3 (9.9-15.3)      |
| 1940-1949      | n/a                  | n/a                  | 8.3 (2.7-19.4)       | 10.3 (8.1-12.9)       | 16.7 (12.6-21.6)        | 12.1 (10.2-14.3)     |
| 1950-1959      | n/a                  | n/a                  | 3.8 (2.6-5.4)        | 8.8 (6.9-11.0)        | 14.8 (1.8-53.6)         | 6.5 (5.3-7.8)        |
| 1960-1969      | n/a                  | 0.0 (0.0-5.9)        | 1.3 (0.8-2.0)        | 2.9 (0.9-6.7)         | n/a                     | 1.4 (0.9-2.1)        |
| 1970-1979      | 0.0 (0.0-90.9)       | 0.1 (0.0-0.8)        | 1.3 (0.7-2.3)        | n/a                   | n/a                     | 0.8 (0.4-1.4)        |
| 1980-1989      | 0.0 (0.0-0.7)        | 0.2 (0.0-0.7)        | 1.9 (0.4-5.5)        | n/a                   | n/a                     | 0.3 (0.1-0.7)        |
| 1990-1999      | 0.0 (0.0-0.5)        | 0.0 (0.0-0.9)        | n/a                  | n/a                   | n/a                     | 0.0 (0.0-0.3)        |
| <b>Overall</b> | <b>0.0 (0.0-0.2)</b> | <b>0.1 (0.0-0.4)</b> | <b>2.0 (1.6-2.6)</b> | <b>9.0 (7.7-10.5)</b> | <b>14.0 (12.2-16.1)</b> | <b>4.3 (3.9-4.7)</b> |

Supplementary Table 32 **Crude incidence rates (95% confidence interval) per 100,000 person-years of invasive cancer of the oropharynx among Manitoba males by birth year and age group.**

| Birth year     | Age group            |                      |                      |                         |                         | Overall              |
|----------------|----------------------|----------------------|----------------------|-------------------------|-------------------------|----------------------|
|                | 9-17                 | 18-30                | 31-50                | 51-64                   | ≥65                     |                      |
| 1920-1929      | n/a                  | n/a                  | n/a                  | n/a                     | 10.9 (7.9-14.5)         | 10.9 (7.9-14.5)      |
| 1930-1939      | n/a                  | n/a                  | n/a                  | 8.6 (4.4-15.0)          | 12.0 (9.3-15.3)         | 11.3 (9.0-14.1)      |
| 1940-1949      | n/a                  | n/a                  | 5.0 (1.0-14.6)       | 13.8 (11.2-16.7)        | 19.0 (14.7-24.3)        | 14.9 (12.7-17.3)     |
| 1950-1959      | n/a                  | n/a                  | 5.3 (3.8-7.2)        | 14.5 (12.1-17.3)        | 37.1 (12.0-86.6)        | 10.3 (8.9-12.0)      |
| 1960-1969      | n/a                  | 0.0 (0.0-5.9)        | 2.7 (2.0-3.7)        | 10.4 (6.2-16.4)         | n/a                     | 3.4 (2.6-4.4)        |
| 1970-1979      | 0.0 (0.0-90.9)       | 0.0 (0.0-0.5)        | 1.2 (0.6-2.2)        | n/a                     | n/a                     | 0.7 (0.3-1.2)        |
| 1980-1989      | 0.0 (0.0-0.7)        | 0.0 (0.0-0.4)        | 1.2 (0.2-4.5)        | n/a                     | n/a                     | 0.1 (0.0-0.4)        |
| 1990-1999      | 0.0 (0.0-0.5)        | 0.0 (0.0-0.9)        | n/a                  | n/a                     | n/a                     | 0.0 (0.0-0.3)        |
| <b>Overall</b> | <b>0.0 (0.0-0.2)</b> | <b>0.0 (0.0-0.2)</b> | <b>2.9 (2.4-3.5)</b> | <b>13.4 (11.8-15.2)</b> | <b>13.2 (11.4-15.2)</b> | <b>5.2 (4.8-5.7)</b> |

Supplementary Table 33 **Crude incidence rates (95% confidence interval) per 100,000 person-years of invasive cancer of the penis among Manitoba males by birth year and age group.**

| <b>Birth year</b> | <b>Age group</b>     |                      |                      |                      |                      | <b>Overall</b>       |
|-------------------|----------------------|----------------------|----------------------|----------------------|----------------------|----------------------|
|                   | <b>9-17</b>          | <b>18-30</b>         | <b>31-50</b>         | <b>51-64</b>         | <b>≥65</b>           |                      |
| 1920-1929         | n/a                  | n/a                  | n/a                  | n/a                  | 5.3 (3.3-8.0)        | 5.3 (3.3-8.0)        |
| 1930-1939         | n/a                  | n/a                  | n/a                  | 2.2 (0.4-6.3)        | 6.9 (4.9-9.5)        | 6.0 (4.3-8.1)        |
| 1940-1949         | n/a                  | n/a                  | 0.0 (0.0-6.1)        | 1.6 (0.8-2.8)        | 7.6 (5.0-11.2)       | 3.3 (2.3-4.5)        |
| 1950-1959         | n/a                  | n/a                  | 1.1 (0.5-2.2)        | 1.6 (0.9-2.7)        | 0.0 (0.0-27.4)       | 1.4 (0.9-2.1)        |
| 1960-1969         | n/a                  | 0.0 (0.0-5.9)        | 0.3 (0.1-0.7)        | 1.2 (0.1-4.2)        | n/a                  | 0.3 (0.1-0.7)        |
| 1970-1979         | 0.0 (0.0-90.9)       | 0.3 (0.0-1.0)        | 0.1 (0.0-0.6)        | n/a                  | n/a                  | 0.2 (0.0-0.6)        |
| 1980-1989         | 0.0 (0.0-0.7)        | 0.0 (0.0-0.4)        | 0.6 (0.0-3.5)        | n/a                  | n/a                  | 0.1 (0.0-0.3)        |
| 1990-1999         | 0.0 (0.0-0.5)        | 0.3 (0.0-1.4)        | n/a                  | n/a                  | n/a                  | 0.1 (0.0-0.5)        |
| <b>Overall</b>    | <b>0.0 (0.0-0.2)</b> | <b>0.1 (0.0-0.4)</b> | <b>0.4 (0.2-0.7)</b> | <b>1.6 (1.1-2.3)</b> | <b>6.7 (5.5-8.2)</b> | <b>1.4 (1.2-1.6)</b> |

### Costing

Supplementary Table 34 **Total net direct medical cost<sup>1</sup> of HPV-related diseases (for patients compared to their matches) in 2017 Canadian dollars among Manitoba males (1997-2015)**

| HPV-related disease                      | Outpatient <sup>2</sup>   | Hospital                  | Prescription drug       | Total                      |
|------------------------------------------|---------------------------|---------------------------|-------------------------|----------------------------|
| Anogenital warts                         | \$6,132,360 (43%)         | \$5,205,323 (37%)         | \$2,826,318 (20%)       | \$14,164,001 (100%)        |
| All HPV-related carcinoma <i>in situ</i> | \$86,339 (63%)            | \$11,247 (8%)             | \$39,377 (29%)          | \$136,963 (100%)           |
| All HPV-related invasive cancers         | \$7,041,975 (20%)         | \$26,714,551 (77%)        | \$1,148,023 (3%)        | \$34,904,549 (100%)        |
| Invasive cancer of the anus              | \$503,078 (16%)           | \$2,186,303 (70%)         | \$451,911 (14%)         | \$3,141,291 (100%)         |
| Invasive cancer of the oral cavity       | \$3,419,404 (20%)         | \$13,703,381 (78%)        | \$364,917 (2%)          | \$17,487,701 (100%)        |
| Invasive cancer of the oropharynx        | \$2,744,239 (23%)         | \$9,080,347 (76%)         | \$175,920 (1%)          | \$12,000,506 (100%)        |
| Invasive cancer of the penis             | \$375,255 (16%)           | \$1,744,521 (77%)         | \$155,275 (7%)          | \$2,275,051 (100%)         |
| <b>Total</b>                             | <b>\$13,260,674 (27%)</b> | <b>\$31,931,122 (65%)</b> | <b>\$4,013,717 (8%)</b> | <b>\$49,205,513 (100%)</b> |

<sup>1</sup> The periods for which costs were added were 0 to 365 days after diagnosis for AGW and carcinoma *in situ* and 180 days before to 730 days after diagnosis for invasive cancer; <sup>2</sup> Outpatient cost includes diagnostic and therapeutic procedures.

Supplementary Table 35 **Total net direct medical cost<sup>1</sup> of HPV-related diseases (for patients compared to their matches) in 2017 Canadian dollars among Manitoba males by age group (1997-2015)**

| HPV-related disease                      | Age (years)           |                         |                           |                           |                           | Total                      |
|------------------------------------------|-----------------------|-------------------------|---------------------------|---------------------------|---------------------------|----------------------------|
|                                          | 9 - 17                | 18 - 30                 | 31 - 50                   | 51 - 64                   | ≥65                       |                            |
| Anogenital warts                         | \$306,100 (2%)        | \$4,032,794 (28%)       | \$6,768,276 (48%)         | \$2,179,081 (15%)         | \$877,750 (6%)            | \$14,164,001 (100%)        |
| All HPV-related carcinoma <i>in situ</i> |                       | \$772 (1%)              | \$10,651 (8%)             | \$65,867 (48%)            | \$59,674 (44%)            | \$136,963 (100%)           |
| All HPV-related invasive cancers         |                       | \$189,539 (1%)          | \$6,013,725 (17%)         | \$16,369,060 (47%)        | \$12,332,225 (35%)        | \$34,904,549 (100%)        |
| Invasive cancer of the anus              |                       | \$43,629 (1%)           | \$754,659 (24%)           | \$1,369,170 (44%)         | \$973,833 (31%)           | \$3,141,291 (100%)         |
| Invasive cancer of the oral cavity       |                       | \$88,918 (1%)           | \$2,571,585 (15%)         | \$7,627,090 (44%)         | \$7,200,108 (41%)         | \$17,487,701 (100%)        |
| Invasive cancer of the oropharynx        |                       |                         | \$2,433,804 (20%)         | \$6,968,059 (58%)         | \$2,598,643 (22%)         | \$12,000,506 (100%)        |
| Invasive cancer of the penis             |                       | \$56,992 (3%)           | \$253,677 (11%)           | \$404,741 (18%)           | \$1,559,642 (69%)         | \$2,275,051 (100%)         |
| <b>Total</b>                             | <b>\$306,100 (1%)</b> | <b>\$4,223,105 (9%)</b> | <b>\$12,792,651 (26%)</b> | <b>\$18,614,008 (38%)</b> | <b>\$13,269,649 (27%)</b> | <b>\$49,205,513 (100%)</b> |



<sup>1</sup> The periods for which costs were added were 0 to 365 days after diagnosis for AGW and carcinoma *in situ* and 180 days before to 730 days after diagnosis for invasive cancer

Supplementary Table 36 **Total net direct medical cost<sup>1</sup> of HPV-related diseases (for patients compared to their matches) in 2017 Canadian dollars among Manitoba males by regional health authority of residence (1997-2015)**

| HPV-related disease                      | Regional Health Authority of Residence |                             |                             |                              |                              |                            | Total                          |
|------------------------------------------|----------------------------------------|-----------------------------|-----------------------------|------------------------------|------------------------------|----------------------------|--------------------------------|
|                                          | Winnipeg                               | Interlake-Eastern           | Northern                    | Southern                     | Prairie Mountain             | Public Trustee/In CFS care |                                |
| Anogenital warts                         | \$10,291,905<br>(73%)                  | \$1,110,305<br>(8%)         | \$510,831<br>(4%)           | \$843,248<br>(6%)            | \$1,273,611<br>(9%)          | \$134,102 (1%)             | \$14,164,001<br>(100%)         |
| All HPV-related carcinoma <i>in situ</i> | \$98,495<br>(72%)                      | \$4,050 (3%)                | \$14,074<br>(10%)           | \$8,135 (6%)                 | \$12,098 (9%)                | \$110 (0%)                 | \$136,963<br>(100%)            |
| All HPV-related invasive cancers         | \$19,359,700<br>(55%)                  | \$3,386,209<br>(10%)        | \$1,453,136<br>(4%)         | \$4,295,468<br>(12%)         | \$6,208,382<br>(18%)         | \$201,653 (1%)             | \$34,904,549<br>(100%)         |
| Invasive cancer of the anus              | \$2,057,537<br>(65%)                   | \$334,783<br>(11%)          | \$115,968<br>(4%)           | \$214,838<br>(7%)            | \$418,166<br>(13%)           |                            | \$3,141,291<br>(100%)          |
| Invasive cancer of the oral cavity       | \$9,932,019<br>(57%)                   | \$1,379,913<br>(8%)         | \$745,366<br>(4%)           | \$2,832,054<br>(16%)         | \$2,483,375<br>(14%)         | \$114,975 (1%)             | \$17,487,701<br>(100%)         |
| Invasive cancer of the oropharynx        | \$6,544,309<br>(55%)                   | \$1,320,713<br>(11%)        | \$512,859<br>(4%)           | \$940,596<br>(8%)            | \$2,611,438<br>(22%)         | \$70,591 (1%)              | \$12,000,506<br>(100%)         |
| Invasive cancer of the penis             | \$825,835<br>(36%)                     | \$350,801<br>(15%)          | \$78,943<br>(3%)            | \$307,980<br>(14%)           | \$695,404<br>(31%)           | \$16,088 (1%)              | \$2,275,051<br>(100%)          |
| <b>Total</b>                             | <b>\$29,750,100<br/>(60%)</b>          | <b>\$4,500,564<br/>(9%)</b> | <b>\$1,978,042<br/>(4%)</b> | <b>\$5,146,850<br/>(10%)</b> | <b>\$7,494,091<br/>(15%)</b> | <b>\$335,866 (1%)</b>      | <b>\$49,205,513<br/>(100%)</b> |

<sup>1</sup> The periods for which costs were added were 0 to 365 days after diagnosis for AGW and carcinoma *in situ* and 180 days before to 730 days after diagnosis for invasive cancer

Supplementary Table 37 **Total net direct medical cost<sup>1</sup> of HPV-related diseases (for patients compared to their matches) in 2017 Canadian dollars among Manitoba males by Winnipeg region of residence (1997-2015)**

| HPV-related disease                      | Winnipeg Region of Residence |                   |                   |                     |
|------------------------------------------|------------------------------|-------------------|-------------------|---------------------|
|                                          | Northern suburbs             | Inner city        | Southern suburbs  | Total               |
| Anogenital warts                         | \$3,113,466 (30%)            | \$3,479,377 (34%) | \$3,695,021 (36%) | \$10,287,864 (100%) |
| All HPV-related carcinoma <i>in situ</i> | \$26,723 (27%)               | \$15,928 (16%)    | \$55,844 (57%)    | \$98,495 (100%)     |
| All HPV-related invasive cancers         | \$4,923,590 (25%)            | \$5,167,484 (27%) | \$9,268,626 (48%) | \$19,359,700 (100%) |

|                                    |                          |                          |                           |                            |
|------------------------------------|--------------------------|--------------------------|---------------------------|----------------------------|
| Invasive cancer of the anus        | \$248,425 (12%)          | \$1,004,216 (49%)        | \$804,896 (39%)           | \$2,057,537 (100%)         |
| Invasive cancer of the oral cavity | \$1,961,605 (20%)        | \$2,925,407 (29%)        | \$5,045,007 (51%)         | \$9,932,019 (100%)         |
| Invasive cancer of the oropharynx  | \$2,439,652 (37%)        | \$936,449 (14%)          | \$3,168,207 (48%)         | \$6,544,309 (100%)         |
| Invasive cancer of the penis       | \$273,907 (33%)          | \$301,412 (36%)          | \$250,516 (30%)           | \$825,835 (100%)           |
| <b>Total</b>                       | <b>\$8,063,779 (27%)</b> | <b>\$8,662,790 (29%)</b> | <b>\$13,019,491 (44%)</b> | <b>\$29,746,060 (100%)</b> |

<sup>1</sup> The periods for which costs were added were 0 to 365 days after diagnosis for AGW and carcinoma *in situ* and 180 days before to 730 days after diagnosis for invasive cancer

Supplementary Table 38 **Total net direct medical cost<sup>1</sup> of HPV-related diseases (for patients compared to their matches) in 2017 Canadian dollars among Manitoba males by year of diagnosis (1997-2015)**

| HPV-related disease                      | Year of diagnosis           |                              |                              |                              |                             |                             |                              |                              |                              |                             |                              |                             |                              |                              |                             |                              |                              |                             |                              |                                 |
|------------------------------------------|-----------------------------|------------------------------|------------------------------|------------------------------|-----------------------------|-----------------------------|------------------------------|------------------------------|------------------------------|-----------------------------|------------------------------|-----------------------------|------------------------------|------------------------------|-----------------------------|------------------------------|------------------------------|-----------------------------|------------------------------|---------------------------------|
|                                          | 1997                        | 1998                         | 1999                         | 2000                         | 2001                        | 2002                        | 2003                         | 2004                         | 2005                         | 2006                        | 2007                         | 2008                        | 2009                         | 2010                         | 2011                        | 2012                         | 2013                         | 2014                        | 2015                         | Total                           |
| Anogenital warts                         | \$458,210<br>(3%)           | \$651,989<br>(5%)            | \$384,438<br>(3%)            | \$745,979<br>(5%)            | \$436,459<br>(3%)           | \$223,102<br>(2%)           | \$1,458,77<br>9 (10%)        | \$702,599<br>(5%)            | \$932,401<br>(7%)            | \$175,078<br>(1%)           | \$693,234<br>(5%)            | \$1,096,98<br>9 (8%)        | \$688,491<br>(5%)            | \$582,797<br>(4%)            | \$1,225,56<br>4 (9%)        | \$995,934<br>(7%)            | \$618,053<br>(4%)            | \$928,885<br>(7%)           | \$1,165,01<br>8 (8%)         | \$14,164,00<br>1 (100%)         |
| All HPV-related carcinoma <i>in situ</i> | \$5,939<br>(4%)             | \$11,768<br>(9%)             | \$220 (0%)                   | \$11,988<br>(9%)             | \$6,049<br>(4%)             | \$8,466<br>(6%)             | \$5,939<br>(4%)              | \$17,573<br>(13%)            | \$11,878<br>(9%)             | \$6,049<br>(4%)             | \$15,157<br>(11%)            | \$220 (0%)                  | \$661 (0%)                   | \$4,282<br>(3%)              | \$3,720<br>(3%)             | \$331 (0%)                   | \$6,380<br>(5%)              | \$6,490<br>(5%)             | \$13,854<br>(10%)            | \$136,963<br>(100%)             |
| All HPV-related invasive cancers         | \$1,231,22<br>8 (4%)        | \$1,363,43<br>8 (4%)         | \$1,500,22<br>3 (4%)         | \$1,386,81<br>5 (4%)         | \$2,664,82<br>8 (8%)        | \$1,472,79<br>3 (4%)        | \$999,002<br>(3%)            | \$2,010,31<br>7 (6%)         | \$1,731,73<br>5 (5%)         | \$1,452,53<br>6 (4%)        | \$2,421,90<br>7 (7%)         | \$2,555,43<br>2 (7%)        | \$2,006,73<br>2 (6%)         | \$2,495,59<br>5 (7%)         | \$2,213,88<br>1 (6%)        | \$1,967,29<br>0 (6%)         | \$1,619,44<br>1 (5%)         | \$1,840,82<br>4 (5%)        | \$1,970,53<br>5 (6%)         | \$34,904,54<br>9 (100%)         |
| Invasive cancer of the anus              | \$66,977<br>(2%)            | \$57,913<br>(2%)             | \$231,475<br>(7%)            | \$76,896<br>(2%)             | \$43,629<br>(1%)            | \$144,177<br>(5%)           | \$67,705<br>(2%)             | \$275,674<br>(9%)            | \$170,611<br>(5%)            | \$50,663<br>(2%)            | \$408,308<br>(13%)           | \$387,996<br>(12%)          | \$254,276<br>(8%)            | \$134,525<br>(4%)            | \$53,809<br>(2%)            | \$65,742<br>(2%)             | \$444,210<br>(14%)           | \$87,628<br>(3%)            | \$119,077<br>(4%)            | \$3,141,291<br>(100%)           |
| Invasive cancer of the oral cavity       | \$615,422<br>(4%)           | \$625,013<br>(4%)            | \$647,398<br>(4%)            | \$443,167<br>(3%)            | \$769,585<br>(4%)           | \$614,283<br>(4%)           | \$515,044<br>(3%)            | \$1,328,59<br>1 (8%)         | \$1,033,29<br>2 (6%)         | \$915,372<br>(5%)           | \$1,045,90<br>9 (6%)         | \$1,727,16<br>8 (10%)       | \$783,459<br>(4%)            | \$1,727,41<br>8 (10%)        | \$1,252,04<br>7 (7%)        | \$1,200,01<br>1 (7%)         | \$627,875<br>(4%)            | \$643,446<br>(4%)           | \$973,200<br>(6%)            | \$17,487,70<br>1 (100%)         |
| Invasive cancer of the oropharynx        | \$328,640<br>(3%)           | \$577,678<br>(5%)            | \$506,862<br>(4%)            | \$815,650<br>(7%)            | \$1,757,93<br>5 (15%)       | \$519,996<br>(4%)           | \$334,081<br>(3%)            | \$359,525<br>(3%)            | \$487,759<br>(4%)            | \$473,744<br>(4%)           | \$855,394<br>(7%)            | \$382,519<br>(3%)           | \$861,457<br>(7%)            | \$646,991<br>(5%)            | \$823,213<br>(7%)           | \$632,060<br>(5%)            | \$475,021<br>(4%)            | \$574,258<br>(5%)           | \$587,723<br>(5%)            | \$12,000,50<br>6 (100%)         |
| Invasive cancer of the penis             | \$220,189<br>(10%)          | \$102,834<br>(5%)            | \$114,488<br>(5%)            | \$51,101<br>(2%)             | \$93,679<br>(4%)            | \$194,337<br>(9%)           | \$82,173<br>(4%)             | \$46,526<br>(2%)             | \$40,073<br>(2%)             | \$12,758<br>(1%)            | \$112,296<br>(5%)            | \$57,749<br>(3%)            | \$107,540<br>(5%)            | \$-13,338<br>(-1%)           | \$84,811<br>(4%)            | \$69,476<br>(3%)             | \$72,334<br>(3%)             | \$535,492<br>(24%)          | \$290,535<br>(13%)           | \$2,275,051<br>(100%)           |
| <b>Total</b>                             | <b>\$1,695,377<br/>(3%)</b> | <b>\$2,027,19<br/>5 (4%)</b> | <b>\$1,884,88<br/>2 (4%)</b> | <b>\$2,144,78<br/>2 (4%)</b> | <b>\$3,107,336<br/>(6%)</b> | <b>\$1,704,361<br/>(3%)</b> | <b>\$2,463,72<br/>0 (5%)</b> | <b>\$2,730,48<br/>9 (6%)</b> | <b>\$2,676,01<br/>4 (5%)</b> | <b>\$1,633,664<br/>(3%)</b> | <b>\$3,130,29<br/>7 (6%)</b> | <b>\$3,652,641<br/>(7%)</b> | <b>\$2,695,88<br/>5 (5%)</b> | <b>\$3,082,67<br/>5 (6%)</b> | <b>\$3,443,165<br/>(7%)</b> | <b>\$2,963,55<br/>5 (6%)</b> | <b>\$2,243,87<br/>3 (5%)</b> | <b>\$2,776,199<br/>(6%)</b> | <b>\$3,149,40<br/>6 (6%)</b> | <b>\$49,205,51<br/>3 (100%)</b> |

<sup>1</sup> The periods for which costs were added were 0 to 365 days after diagnosis for AGW and carcinoma *in situ* and 180 days before to 730 days after diagnosis for invasive cancer



Supplementary Table 39 **Average of net direct medical cost of HPV-related diseases (for patients compared to their matches) in 2017 Canadian dollars among Manitoba males by successive 90-day periods before and after diagnosis (1997-2015)**

| <b>HPV-related disease</b>               | <b>-360 to -271 days</b> | <b>-270 to -181 days</b> | <b>-180 to -91 days</b> | <b>-90 to -1 days</b> | <b>0 to 90 days</b> | <b>91 to 180 days</b> | <b>181 to 270 days</b> | <b>271 to 360 days</b> | <b>361 to 450 days</b> | <b>451 to 540 days</b> | <b>541 to 630 days</b> | <b>631 to 720 days</b> | <b>721 to 810 days</b> | <b>811 to 900 days</b> | <b>901 to 990 days</b> | <b>991 to 1080 days</b> |
|------------------------------------------|--------------------------|--------------------------|-------------------------|-----------------------|---------------------|-----------------------|------------------------|------------------------|------------------------|------------------------|------------------------|------------------------|------------------------|------------------------|------------------------|-------------------------|
| Anogenital warts                         | \$73                     | \$114                    | \$73                    | \$117                 | \$521               | \$118                 | \$138                  | \$181                  | \$151                  | \$75                   | \$261                  | \$131                  | \$133                  | \$119                  | \$105                  | \$79                    |
| All HPV-related carcinoma <i>in situ</i> | \$-199                   | \$458                    | \$-207                  | \$2,221               | \$1,303             | \$322                 | \$-171                 | \$65                   | \$29                   | \$503                  | \$-77                  | \$1,266                | \$2,700                | \$608                  | \$-383                 | \$92                    |
| All HPV-related invasive cancers         | \$216                    | \$118                    | \$-12                   | \$537                 | \$15,241            | \$2,784               | \$4,383                | \$2,305                | \$1,826                | \$1,580                | \$1,540                | \$263                  | \$586                  | \$828                  | \$1,220                | \$1,239                 |
| Invasive cancer of the anus              | \$634                    | \$979                    | \$1,331                 | \$3,830               | \$10,731            | \$5,053               | \$3,595                | \$7,544                | \$6,828                | \$2,313                | \$1,541                | \$709                  | \$2,319                | \$886                  | \$2,468                | \$664                   |
| Invasive cancer of the oral cavity       | \$560                    | \$251                    | \$191                   | \$874                 | \$25,338            | \$3,196               | \$3,925                | \$2,683                | \$2,077                | \$1,316                | \$1,054                | \$119                  | \$265                  | \$1,828                | \$961                  | \$46                    |
| Invasive cancer of the oropharynx        | \$29                     | \$-19                    | \$-178                  | \$-307                | \$9,886             | \$2,228               | \$5,732                | \$1,493                | \$1,219                | \$1,282                | \$1,821                | \$448                  | \$515                  | \$125                  | \$727                  | \$567                   |
| Invasive cancer of the penis             | \$-393                   | \$-260                   | \$-765                  | \$842                 | \$6,048             | \$2,337               | \$1,200                | \$1,303                | \$577                  | \$3,125                | \$2,019                | \$-225                 | \$915                  | \$289                  | \$3,200                | \$7,830                 |

Supplementary Table 40 **Median of net direct medical cost of HPV-related diseases (for patients compared to their matches) in 2017 Canadian dollars among Manitoba males by successive 90-day periods before and after diagnosis (1997-2015)**

| <b>HPV-related disease</b>               | <b>-360 to -271 days</b> | <b>-270 to -181 days</b> | <b>-180 to -91 days</b> | <b>-90 to -1 days</b> | <b>0 to 90 days</b> | <b>91 to 180 days</b> | <b>181 to 270 days</b> | <b>271 to 360 days</b> | <b>361 to 450 days</b> | <b>451 to 540 days</b> | <b>541 to 630 days</b> | <b>631 to 720 days</b> | <b>721 to 810 days</b> | <b>811 to 900 days</b> | <b>901 to 990 days</b> | <b>991 to 1080 days</b> |
|------------------------------------------|--------------------------|--------------------------|-------------------------|-----------------------|---------------------|-----------------------|------------------------|------------------------|------------------------|------------------------|------------------------|------------------------|------------------------|------------------------|------------------------|-------------------------|
| Anogenital warts                         | \$0                      | \$0                      | \$0                     | \$17                  | \$168               | \$1                   | \$0                    | \$0                    | \$0                    | \$0                    | \$0                    | \$-1                   | \$-0                   | \$-1                   | \$0                    | \$0                     |
| All HPV-related carcinoma <i>in situ</i> | \$-45                    | \$0                      | \$-8                    | \$160                 | \$843               | \$49                  | \$3                    | \$36                   | \$34                   | \$-6                   | \$-11                  | \$40                   | \$0                    | \$11                   | \$-8                   | \$0                     |
| All HPV-related invasive cancers         | \$-34                    | \$-37                    | \$-34                   | \$219                 | \$6,355             | \$401                 | \$211                  | \$100                  | \$87                   | \$47                   | \$0                    | \$0                    | \$0                    | \$0                    | \$0                    | \$0                     |
| Invasive cancer of the anus              | \$49                     | \$-3                     | \$116                   | \$507                 | \$4,540             | \$1,616               | \$690                  | \$687                  | \$702                  | \$175                  | \$110                  | \$124                  | \$153                  | \$1                    | \$0                    | \$0                     |
| Invasive cancer of the oral cavity       | \$-16                    | \$-23                    | \$-30                   | \$116                 | \$13,197            | \$249                 | \$220                  | \$84                   | \$79                   | \$0                    | \$0                    | \$0                    | \$0                    | \$0                    | \$0                    | \$-5                    |
| Invasive cancer of the oropharynx        | \$-45                    | \$-44                    | \$-40                   | \$266                 | \$5,104             | \$474                 | \$204                  | \$88                   | \$73                   | \$64                   | \$0                    | \$0                    | \$0                    | \$0                    | \$0                    | \$0                     |
| Invasive cancer of the penis             | \$-75                    | \$-55                    | \$-39                   | \$273                 | \$3,177             | \$164                 | \$28                   | \$46                   | \$29                   | \$86                   | \$18                   | \$0                    | \$0                    | \$0                    | \$0                    | \$0                     |

### Net cost by age

Supplementary Table 41 **Distribution of net direct medical cost<sup>1</sup> of anogenital warts (for patients compared to their matches) in 2017 Canadian dollars among Manitoba males by age group (1997-2015)**

| Age (years)    | Average      | SD <sup>2</sup> | Median       | Q1 - Q3 <sup>3</sup> |
|----------------|--------------|-----------------|--------------|----------------------|
| 9 - 17         | \$1,004      | \$5,558         | \$305        | \$28 - \$926         |
| 18 - 30        | \$527        | \$5,762         | \$237        | \$-3 - \$707         |
| 31 - 50        | \$1,254      | \$14,053        | \$266        | \$-175 - \$1,049     |
| 51 - 64        | \$1,983      | \$13,999        | \$465        | \$-646 - \$2,384     |
| ≥65            | \$2,421      | \$23,561        | \$789        | \$-1,269 - \$3,807   |
| <b>Overall</b> | <b>\$958</b> | <b>\$10,883</b> | <b>\$256</b> | <b>\$-86 - \$941</b> |

<sup>1</sup> The period for which costs were added was 0 to 365 days after diagnosis for AGW; <sup>2</sup> Standard deviation; <sup>3</sup> Q1 and Q3 are the first and third quartile respectively

Supplementary Table 42 **Distribution of net direct medical cost<sup>1</sup> of HPV-related carcinoma *in situ* (for patients compared to their matches) in 2017 Canadian dollars among Manitoba males by age group (1997-2015)**

| Age (years)    | Average        | SD <sup>2</sup> | Median         | Q1 - Q3 <sup>3</sup>   |
|----------------|----------------|-----------------|----------------|------------------------|
| 18 - 30        | \$-804         | \$5,429         | \$439          | \$361 - \$2,511        |
| 31 - 50        | \$4,098        | \$4,721         | \$1,421        | \$724 - \$8,038        |
| 51 - 64        | \$2,408        | \$3,563         | \$2,042        | \$559 - \$4,464        |
| ≥65            | \$-348         | \$18,221        | \$1,025        | \$-584 - \$4,641       |
| <b>Overall</b> | <b>\$1,466</b> | <b>\$11,483</b> | <b>\$1,253</b> | <b>\$-45 - \$4,638</b> |

<sup>1</sup> The period for which costs were added was 0 to 365 days after diagnosis for carcinoma *in situ*; <sup>2</sup> Standard deviation; <sup>3</sup> Q1 and Q3 are the first and third quartile respectively

Supplementary Table 43 **Distribution of net direct medical cost<sup>1</sup> of HPV-related invasive cancer (for patients compared to their matches) in 2017 Canadian dollars among Manitoba males by age group (1997-2015)**

| Age (years) | Average  | SD <sup>2</sup> | Median   | Q1 - Q3 <sup>3</sup> |
|-------------|----------|-----------------|----------|----------------------|
| 18 - 30     | \$29,182 | \$18,455        | \$27,283 | \$25,192 - \$32,891  |
| 31 - 50     | \$32,275 | \$46,358        | \$18,343 | \$6,226 - \$44,239   |
| 51 - 64     | \$34,883 | \$89,325        | \$16,538 | \$5,357 - \$44,567   |
| ≥65         | \$24,703 | \$61,976        | \$14,644 | \$620 - \$39,968     |



---

|                |                 |                 |                 |                           |
|----------------|-----------------|-----------------|-----------------|---------------------------|
| <b>Overall</b> | <b>\$30,382</b> | <b>\$72,834</b> | <b>\$16,411</b> | <b>\$4,527 - \$43,189</b> |
|----------------|-----------------|-----------------|-----------------|---------------------------|

---

<sup>1</sup> The period for which costs were added was 180 days before to 730 days after diagnosis for invasive cancer; <sup>2</sup> Standard deviation; <sup>3</sup> Q1 and Q3 are the first and third quartile respectively

Supplementary Table 44 **Distribution of net direct medical cost<sup>1</sup> of invasive cancer of the anus (for patients compared to their matches) in 2017 Canadian dollars among Manitoba males by age group (1997-2015)**

| Age (years)    | Average         | SD <sup>2</sup> | Median          | Q1 - Q3 <sup>3</sup>       |
|----------------|-----------------|-----------------|-----------------|----------------------------|
| 31 - 50        | \$59,252        | \$53,357        | \$41,240        | \$13,041 - \$98,003        |
| 51 - 64        | \$40,060        | \$48,646        | \$23,212        | \$5,869 - \$62,087         |
| ≥65            | \$39,966        | \$69,811        | \$21,659        | \$11,627 - \$72,841        |
| <b>Overall</b> | <b>\$43,629</b> | <b>\$56,467</b> | <b>\$23,712</b> | <b>\$10,213 - \$72,533</b> |

<sup>1</sup> The period for which costs were added was 180 days before to 730 days after diagnosis for invasive cancer; <sup>2</sup> Standard deviation; <sup>3</sup> Q1 and Q3 are the first and third quartile respectively

Supplementary Table 45 **Distribution of net direct medical cost<sup>1</sup> of invasive cancer of the oral cavity (for patients compared to their matches) in 2017 Canadian dollars among Manitoba males by age group (1997-2015)**

| Age (years)    | Average         | SD <sup>2</sup> | Median          | Q1 - Q3 <sup>3</sup>      |
|----------------|-----------------|-----------------|-----------------|---------------------------|
| 18 - 30        | \$44,459        | \$16,360        | \$44,459        | \$32,891 - \$56,028       |
| 31 - 50        | \$38,115        | \$47,299        | \$23,903        | \$5,194 - \$54,841        |
| 51 - 64        | \$45,489        | \$74,075        | \$30,826        | \$9,869 - \$59,381        |
| ≥65            | \$37,076        | \$69,133        | \$24,857        | \$2,546 - \$54,060        |
| <b>Overall</b> | <b>\$40,669</b> | <b>\$67,962</b> | <b>\$27,175</b> | <b>\$7,307 - \$57,202</b> |

<sup>1</sup> The period for which costs were added was 180 days before to 730 days after diagnosis for invasive cancer; <sup>2</sup> Standard deviation; <sup>3</sup> Q1 and Q3 are the first and third quartile respectively

Supplementary Table 46 **Distribution of net direct medical cost<sup>1</sup> of invasive cancer of the oropharynx (for patients compared to their matches) in 2017 Canadian dollars among Manitoba males by age group (1997-2015)**

| Age (years)    | Average         | SD <sup>2</sup> | Median          | Q1 - Q3 <sup>3</sup>      |
|----------------|-----------------|-----------------|-----------------|---------------------------|
| 31 - 50        | \$26,622        | \$45,871        | \$17,320        | \$6,835 - \$29,638        |
| 51 - 64        | \$29,455        | \$106,293       | \$12,868        | \$4,589 - \$29,543        |
| ≥65            | \$12,270        | \$60,209        | \$9,168         | \$-4,552 - \$31,184       |
| <b>Overall</b> | <b>\$23,530</b> | <b>\$84,366</b> | <b>\$12,551</b> | <b>\$3,683 - \$29,873</b> |

<sup>1</sup> The period for which costs were added was 180 days before to 730 days after diagnosis for invasive cancer; <sup>2</sup> Standard deviation; <sup>3</sup> Q1 and Q3 are the first and third quartile respectively

Supplementary Table 47 **Distribution of net direct medical cost<sup>1</sup> of invasive cancer of the penis (for patients compared to their matches) in 2017 Canadian dollars among Manitoba males by age group (1997-2015)**

| <b>Age (years)</b> | <b>Average</b>  | <b>SD<sup>2</sup></b> | <b>Median</b>  | <b>Q1 - Q3<sup>3</sup></b> |
|--------------------|-----------------|-----------------------|----------------|----------------------------|
| 18 - 30            | \$18,997        | \$12,584              | \$25,192       | \$4,517 - \$27,283         |
| 31 - 50            | \$18,246        | \$24,334              | \$6,893        | \$1,308 - \$21,636         |
| 51 - 64            | \$13,031        | \$26,133              | \$7,640        | \$4,537 - \$17,639         |
| ≥65                | \$17,278        | \$37,488              | \$9,852        | \$1,127 - \$24,807         |
| <b>Overall</b>     | <b>\$16,486</b> | <b>\$33,336</b>       | <b>\$9,417</b> | <b>\$2,806 - \$21,572</b>  |

<sup>1</sup> The period for which costs were added was 180 days before to 730 days after diagnosis for invasive cancer; <sup>2</sup> Standard deviation; <sup>3</sup> Q1 and Q3 are the first and third quartile respectively

**Net cost by regional health authority and Winnipeg region of residence**

Supplementary Table 48 **Distribution of net direct medical cost<sup>1</sup> of anogenital warts (for patients compared to their matches) in 2017 Canadian dollars among Manitoba males by regional health authority and Winnipeg region of residence (1997-2015)**

| <b>Region</b>              | <b>Average</b> | <b>SD<sup>2</sup></b> | <b>Median</b> | <b>Q1 - Q3<sup>3</sup></b> |
|----------------------------|----------------|-----------------------|---------------|----------------------------|
| Winnipeg                   | \$976          | \$12,207              | \$251         | \$-94 - \$918              |
| Northern suburbs           | \$1,006        | \$10,467              | \$254         | \$-83 - \$927              |
| Inner city                 | \$1,796        | \$20,557              | \$248         | \$-157 - \$1,074           |
| Southern suburbs           | \$670          | \$8,629               | \$251         | \$-90 - \$864              |
| Interlake-Eastern          | \$1,086        | \$6,737               | \$273         | \$-62 - \$1,107            |
| Northern                   | \$1,373        | \$7,996               | \$277         | \$-44 - \$1,129            |
| Southern                   | \$635          | \$4,786               | \$276         | \$-27 - \$884              |
| Prairie Mountain           | \$852          | \$6,604               | \$251         | \$-81 - \$929              |
| Public Trustee/In CFS care | \$5,047        | \$16,260              | \$127         | \$-904 - \$1,141           |
| <b>Overall</b>             | <b>\$958</b>   | <b>\$10,883</b>       | <b>\$256</b>  | <b>\$-86 - \$941</b>       |

<sup>1</sup> The period for which costs were added was 0 to 365 days after diagnosis for AGW; <sup>2</sup> Standard deviation; <sup>3</sup> Q1 and Q3 are the first and third quartile respectively

Supplementary Table 49 **Distribution of net direct medical cost<sup>1</sup> of HPV-related carcinoma *in situ* (for patients compared to their matches) in 2017 Canadian dollars among Manitoba males by regional health authority and Winnipeg region of residence (1997-2015)**

| <b>Region</b>              | <b>Average</b> | <b>SD<sup>2</sup></b> | <b>Median</b>  | <b>Q1 - Q3<sup>3</sup></b> |
|----------------------------|----------------|-----------------------|----------------|----------------------------|
| Winnipeg                   | \$3,345        | \$7,490               | \$1,843        | \$404 - \$4,881            |
| Northern suburbs           | \$4,849        | \$7,587               | \$1,989        | \$697 - \$5,260            |
| Inner city                 | \$1,747        | \$7,996               | \$626          | \$-3,466 - \$3,922         |
| Southern suburbs           | \$3,125        | \$7,327               | \$2,097        | \$310 - \$4,495            |
| Interlake-Eastern          | \$-1,909       | \$14,044              | \$398          | \$-351 - \$4,003           |
| Northern                   | \$3,840        | \$5,604               | \$1,659        | \$361 - \$4,296            |
| Southern                   | \$-24          | \$2,916               | \$-584         | \$-2,620 - \$3,131         |
| Prairie Mountain           | \$-11,468      | \$31,921              | \$957          | \$-29,690 - \$6,754        |
| Public Trustee/In CFS care | S              | S                     | S              | S                          |
| <b>Overall</b>             | <b>\$1,466</b> | <b>\$11,483</b>       | <b>\$1,253</b> | <b>\$-45 - \$4,638</b>     |

<sup>1</sup> The period for which costs were added was 0 to 365 days after diagnosis for carcinoma *in situ*; <sup>2</sup> Standard deviation; <sup>3</sup> Q1 and Q3 are the first and third quartile respectively; S = Suppressed

Supplementary Table 50 **Distribution of net direct medical cost<sup>1</sup> of HPV-related invasive cancer (for patients compared to their matches) in 2017 Canadian dollars among Manitoba males by regional health authority and Winnipeg region of residence (1997-2015)**

| <b>Region</b>              | <b>Average</b>  | <b>SD<sup>2</sup></b> | <b>Median</b>   | <b>Q1 - Q3<sup>3</sup></b> |
|----------------------------|-----------------|-----------------------|-----------------|----------------------------|
| Winnipeg                   | \$27,698        | \$55,513              | \$16,538        | \$4,299 - \$43,078         |
| Northern suburbs           | \$25,213        | \$44,383              | \$16,699        | \$4,273 - \$33,003         |
| Inner city                 | \$38,559        | \$83,948              | \$29,913        | \$9,944 - \$65,232         |
| Southern suburbs           | \$24,687        | \$45,324              | \$12,820        | \$3,576 - \$40,018         |
| Interlake-Eastern          | \$26,191        | \$42,774              | \$15,460        | \$5,136 - \$32,411         |
| Northern                   | \$32,670        | \$45,228              | \$20,044        | \$5,357 - \$47,807         |
| Southern                   | \$43,908        | \$96,860              | \$29,986        | \$7,374 - \$56,805         |
| Prairie Mountain           | \$38,688        | \$128,945             | \$12,361        | \$4,340 - \$42,871         |
| Public Trustee/In CFS care | \$1,294         | \$36,797              | \$-3,688        | \$-28,523 - \$12,533       |
| <b>Overall</b>             | <b>\$30,382</b> | <b>\$72,834</b>       | <b>\$16,411</b> | <b>\$4,527 - \$43,189</b>  |

<sup>1</sup> The period for which costs were added was 180 days before to 730 days after diagnosis for invasive cancer; <sup>2</sup> Standard deviation; <sup>3</sup> Q1 and Q3 are the first and third quartile respectively

Supplementary Table 51 **Distribution of net direct medical cost<sup>1</sup> of invasive cancer of the anus (for patients compared to their matches) in 2017 Canadian dollars among Manitoba males by regional health authority and Winnipeg region of residence (1997-2015)**

| <b>Region</b>     | <b>Average</b>  | <b>SD<sup>2</sup></b> | <b>Median</b>   | <b>Q1 - Q3<sup>3</sup></b> |
|-------------------|-----------------|-----------------------|-----------------|----------------------------|
| Winnipeg          | \$41,921        | \$56,560              | \$25,363        | \$10,844 - \$69,693        |
| Northern suburbs  | \$22,584        | \$37,865              | \$13,037        | \$3,887 - \$24,076         |
| Inner city        | \$71,730        | \$47,536              | \$58,765        | \$33,308 - \$116,772       |
| Southern suburbs  | \$32,620        | \$63,616              | \$22,355        | \$3,906 - \$49,172         |
| Interlake-Eastern | \$41,593        | \$59,313              | \$11,136        | \$8,731 - \$79,233         |
| Northern          | \$36,169        | \$32,488              | \$36,169        | \$13,197 - \$59,142        |
| Southern          | \$57,070        | \$56,885              | \$70,718        | \$-5,398 - \$105,889       |
| Prairie Mountain  | \$57,456        | \$76,342              | \$21,207        | \$10,210 - \$74,348        |
| <b>Overall</b>    | <b>\$43,629</b> | <b>\$56,467</b>       | <b>\$23,712</b> | <b>\$10,213 - \$72,533</b> |

<sup>1</sup> The period for which costs were added was 180 days before to 730 days after diagnosis for invasive cancer; <sup>2</sup> Standard deviation; <sup>3</sup> Q1 and Q3 are the first and third quartile respectively

Supplementary Table 52 **Distribution of net direct medical cost<sup>1</sup> of invasive cancer of the oral cavity (for patients compared to their matches) in 2017 Canadian dollars among Manitoba males by regional health authority and Winnipeg region of residence (1997-2015)**

| <b>Region</b>              | <b>Average</b>  | <b>SD<sup>2</sup></b> | <b>Median</b>   | <b>Q1 - Q3<sup>3</sup></b> |
|----------------------------|-----------------|-----------------------|-----------------|----------------------------|
| Winnipeg                   | \$37,102        | \$53,830              | \$26,064        | \$6,274 - \$54,814         |
| Northern suburbs           | \$26,824        | \$38,840              | \$22,158        | \$6,658 - \$35,040         |
| Inner city                 | \$58,042        | \$76,895              | \$43,695        | \$15,391 - \$67,897        |
| Southern suburbs           | \$33,960        | \$47,170              | \$18,397        | \$4,555 - \$54,060         |
| Interlake-Eastern          | \$27,402        | \$38,354              | \$21,092        | \$5,136 - \$34,934         |
| Northern                   | \$54,207        | \$61,381              | \$35,557        | \$17,066 - \$61,977        |
| Southern                   | \$70,138        | \$120,235             | \$45,770        | \$30,936 - \$73,998        |
| Prairie Mountain           | \$49,445        | \$95,581              | \$17,924        | \$8,027 - \$67,908         |
| Public Trustee/In CFS care | \$-1,407        | \$44,599              | \$-5,290        | \$-28,523 - \$-3,688       |
| <b>Overall</b>             | <b>\$40,669</b> | <b>\$67,962</b>       | <b>\$27,175</b> | <b>\$7,307 - \$57,202</b>  |

<sup>1</sup> The period for which costs were added was 180 days before to 730 days after diagnosis for invasive cancer; <sup>2</sup> Standard deviation; <sup>3</sup> Q1 and Q3 are the first and third quartile respectively

Supplementary Table 53 **Distribution of net direct medical cost<sup>1</sup> of invasive cancer of the oropharynx (for patients compared to their matches) in 2017 Canadian dollars among Manitoba males by regional health authority and Winnipeg region of residence (1997-2015)**

| <b>Region</b>     | <b>Average</b>  | <b>SD<sup>2</sup></b> | <b>Median</b>   | <b>Q1 - Q3<sup>3</sup></b> |
|-------------------|-----------------|-----------------------|-----------------|----------------------------|
| Winnipeg          | \$20,073        | \$58,667              | \$12,868        | \$3,683 - \$29,758         |
| Northern suburbs  | \$25,734        | \$51,148              | \$14,052        | \$3,786 - \$29,543         |
| Inner city        | \$16,055        | \$100,981             | \$18,937        | \$3,053 - \$55,912         |
| Southern suburbs  | \$18,367        | \$40,836              | \$10,006        | \$3,457 - \$26,863         |
| Interlake-Eastern | \$23,128        | \$45,119              | \$13,799        | \$4,090 - \$28,172         |
| Northern          | \$23,263        | \$29,282              | \$14,598        | \$2,258 - \$38,485         |
| Southern          | \$21,305        | \$81,186              | \$11,409        | \$-1,648 - \$32,010        |
| Prairie Mountain  | \$43,945        | \$185,728             | \$11,752        | \$4,604 - \$31,184         |
| <b>Overall</b>    | <b>\$23,530</b> | <b>\$84,366</b>       | <b>\$12,551</b> | <b>\$3,683 - \$29,873</b>  |

<sup>1</sup> The period for which costs were added was 180 days before to 730 days after diagnosis for invasive cancer; <sup>2</sup> Standard deviation; <sup>3</sup> Q1 and Q3 are the first and third quartile respectively

Supplementary Table 54 **Distribution of net direct medical cost<sup>1</sup> of invasive cancer of the penis (for patients compared to their matches) in 2017 Canadian dollars among Manitoba males by regional health authority and Winnipeg region of residence (1997-2015)**

| <b>Region</b>              | <b>Average</b>  | <b>SD<sup>2</sup></b> | <b>Median</b>  | <b>Q1 - Q3<sup>3</sup></b> |
|----------------------------|-----------------|-----------------------|----------------|----------------------------|
| Winnipeg                   | \$13,220        | \$28,028              | \$9,994        | \$2,864 - \$20,996         |
| Northern suburbs           | \$17,210        | \$29,165              | \$16,672       | \$2,864 - \$32,932         |
| Inner city                 | \$19,174        | \$22,974              | \$12,495       | \$4,537 - \$20,996         |
| Southern suburbs           | \$6,891         | \$30,058              | \$7,359        | \$-2,286 - \$16,718        |
| Interlake-Eastern          | \$26,486        | \$38,005              | \$12,239       | \$5,782 - \$23,217         |
| Northern                   | \$3,250         | \$23,723              | \$9,801        | \$-12,874 - \$19,373       |
| Southern                   | \$25,001        | \$30,176              | \$16,264       | \$1,127 - \$66,345         |
| Prairie Mountain           | \$16,999        | \$40,373              | \$9,048        | \$-726 - \$21,572          |
| Public Trustee/In CFS care | \$8,044         | \$6,349               | \$8,044        | \$3,555 - \$12,533         |
| <b>Overall</b>             | <b>\$16,486</b> | <b>\$33,336</b>       | <b>\$9,417</b> | <b>\$2,806 - \$21,572</b>  |

<sup>1</sup> The period for which costs were added was 180 days before to 730 days after diagnosis for invasive cancer; <sup>2</sup> Standard deviation; <sup>3</sup> Q1 and Q3 are the first and third quartile respectively

**Net cost by year of diagnosis**

Supplementary Table 55 **Distribution of net direct medical cost<sup>1</sup> of anogenital warts (for patients compared to their matches) in 2017 Canadian dollars among Manitoba males by year of diagnosis (1997-2015)**

| <b>Year of diagnosis</b> | <b>Average</b> | <b>SD<sup>2</sup></b> | <b>Median</b> | <b>Q1 - Q3<sup>3</sup></b> |
|--------------------------|----------------|-----------------------|---------------|----------------------------|
| 1997                     | \$588          | \$10,700              | \$232         | \$-21 - \$1,052            |
| 1998                     | \$1,005        | \$4,622               | \$205         | \$-88 - \$1,160            |
| 1999                     | \$653          | \$4,085               | \$173         | \$-100 - \$797             |
| 2000                     | \$1,200        | \$17,041              | \$238         | \$-61 - \$1,019            |
| 2001                     | \$728          | \$5,503               | \$197         | \$-94 - \$732              |
| 2002                     | \$312          | \$4,756               | \$176         | \$-138 - \$695             |
| 2003                     | \$2,044        | \$26,449              | \$202         | \$-105 - \$759             |
| 2004                     | \$928          | \$7,921               | \$264         | \$-28 - \$878              |
| 2005                     | \$1,163        | \$17,280              | \$203         | \$-112 - \$702             |
| 2006                     | \$217          | \$7,553               | \$183         | \$-169 - \$660             |
| 2007                     | \$948          | \$8,499               | \$234         | \$-93 - \$821              |
| 2008                     | \$1,329        | \$9,361               | \$242         | \$-137 - \$835             |
| 2009                     | \$817          | \$4,946               | \$278         | \$-85 - \$918              |
| 2010                     | \$633          | \$4,565               | \$342         | \$-88 - \$1,052            |
| 2011                     | \$1,338        | \$13,543              | \$345         | \$-11 - \$1,011            |
| 2012                     | \$1,067        | \$6,414               | \$315         | \$-104 - \$975             |
| 2013                     | \$743          | \$8,297               | \$347         | \$-75 - \$1,085            |
| 2014                     | \$1,025        | \$8,102               | \$391         | \$-30 - \$1,196            |
| 2015                     | \$1,292        | \$10,625              | \$327         | \$-89 - \$1,258            |
| <b>Overall</b>           | <b>\$958</b>   | <b>\$10,883</b>       | <b>\$256</b>  | <b>\$-86 - \$941</b>       |

<sup>1</sup> The period for which costs were added was 0 to 365 days after diagnosis for AGW; <sup>2</sup> Standard deviation; <sup>3</sup> Q1 and Q3 are the first and third quartile respectively



Supplementary Table 56 **Distribution of net direct medical cost<sup>1</sup> of HPV-related carcinoma *in situ* (for patients compared to their matches) in 2017 Canadian dollars among Manitoba males by year of diagnosis (1997-2015)**

| <b>Year of diagnosis</b> | <b>Average</b> | <b>SD<sup>2</sup></b> | <b>Median</b>  | <b>Q1 - Q3<sup>3</sup></b> |
|--------------------------|----------------|-----------------------|----------------|----------------------------|
| 1997                     | \$1,791        | \$1,019               | \$1,791        | \$1,071 - \$2,511          |
| 1998                     | \$3,550        | \$4,317               | \$3,203        | \$-584 - \$8,030           |
| 1999                     | \$2,295        | \$2,002               | \$2,295        | \$879 - \$3,711            |
| 2000                     | \$3,911        | \$4,858               | \$2,168        | \$799 - \$7,022            |
| 2001                     | \$1,914        | \$2,919               | \$697          | \$-200 - \$5,244           |
| 2002                     | \$-4,986       | \$16,571              | \$923          | \$-1,051 - \$3,554         |
| 2003                     | \$2,513        | \$4,400               | \$2,513        | \$-598 - \$5,624           |
| 2004                     | \$2,107        | \$4,745               | \$2,097        | \$-134 - \$4,085           |
| 2005                     | \$789          | \$4,295               | \$525          | \$-2,092 - \$3,671         |
| 2006                     | \$-80          | \$5,389               | \$2,096        | \$-6,217 - \$3,880         |
| 2007                     | \$3,571        | \$3,601               | \$3,014        | \$678 - \$6,463            |
| 2008                     | \$14,547       | \$13,651              | \$14,547       | \$4,894 - \$24,199         |
| 2009                     | \$3,964        | \$22,050              | \$5,560        | \$1,025 - \$14,854         |
| 2010                     | \$-14,148      | \$29,770              | \$101          | \$-29,492 - \$1,197        |
| 2011                     | \$205          | \$4,717               | \$439          | \$-84 - \$1,025            |
| 2012                     | \$1,929        | \$2,436               | \$1,218        | \$-72 - \$4,641            |
| 2013                     | \$4,063        | \$15,969              | \$1,192        | \$-2,765 - \$3,131         |
| 2014                     | \$2,898        | \$3,575               | \$1,019        | \$-226 - \$6,799           |
| 2015                     | \$3,610        | \$4,200               | \$2,248        | \$429 - \$4,433            |
| <b>Overall</b>           | <b>\$1,466</b> | <b>\$11,483</b>       | <b>\$1,253</b> | <b>\$-45 - \$4,638</b>     |

<sup>1</sup> The period for which costs were added was 0 to 365 days after diagnosis for carcinoma *in situ*; <sup>2</sup> Standard deviation; <sup>3</sup> Q1 and Q3 are the first and third quartile respectively

Supplementary Table 57 **Distribution of net direct medical cost<sup>1</sup> of HPV-related invasive cancer (for patients compared to their matches) in 2017 Canadian dollars among Manitoba males by year of diagnosis (1997-2015)**

| <b>Year of diagnosis</b> | <b>Average</b>  | <b>SD<sup>2</sup></b> | <b>Median</b>   | <b>Q1 - Q3<sup>3</sup></b> |
|--------------------------|-----------------|-----------------------|-----------------|----------------------------|
| 1997                     | \$24,270        | \$37,416              | \$19,242        | \$1,750 - \$34,934         |
| 1998                     | \$28,495        | \$49,487              | \$21,016        | \$5,484 - \$36,891         |
| 1999                     | \$33,631        | \$62,066              | \$15,162        | \$1,308 - \$54,032         |
| 2000                     | \$25,505        | \$47,256              | \$21,636        | \$3,669 - \$42,209         |
| 2001                     | \$48,384        | \$208,928             | \$17,944        | \$3,231 - \$42,871         |
| 2002                     | \$26,482        | \$34,182              | \$22,024        | \$6,444 - \$50,453         |
| 2003                     | \$18,177        | \$88,144              | \$20,556        | \$6,274 - \$43,817         |
| 2004                     | \$38,038        | \$64,373              | \$21,292        | \$4,736 - \$45,574         |
| 2005                     | \$36,816        | \$47,412              | \$20,066        | \$7,130 - \$58,227         |
| 2006                     | \$25,963        | \$42,424              | \$12,700        | \$165 - \$33,308           |
| 2007                     | \$38,350        | \$74,064              | \$17,718        | \$4,096 - \$47,807         |
| 2008                     | \$39,127        | \$80,999              | \$16,002        | \$4,107 - \$61,977         |
| 2009                     | \$32,683        | \$60,373              | \$18,937        | \$4,254 - \$44,128         |
| 2010                     | \$38,490        | \$99,302              | \$19,048        | \$5,045 - \$43,131         |
| 2011                     | \$27,433        | \$36,223              | \$14,385        | \$4,902 - \$42,561         |
| 2012                     | \$32,273        | \$58,507              | \$11,996        | \$7,046 - \$30,771         |
| 2013                     | \$24,051        | \$37,912              | \$17,283        | \$5,705 - \$43,135         |
| 2014                     | \$24,516        | \$39,853              | \$14,452        | \$4,259 - \$47,549         |
| 2015                     | \$19,897        | \$31,470              | \$12,295        | \$3,950 - \$31,498         |
| <b>Overall</b>           | <b>\$30,382</b> | <b>\$72,834</b>       | <b>\$16,411</b> | <b>\$4,527 - \$43,189</b>  |

<sup>1</sup> The period for which costs were added was 180 days before to 730 days after diagnosis for invasive cancer; <sup>2</sup> Standard deviation; <sup>3</sup> Q1 and Q3 are the first and third quartile respectively

Supplementary Table 58 **Distribution of net direct medical cost<sup>1</sup> of invasive cancer of the anus (for patients compared to their matches) in 2017 Canadian dollars among Manitoba males by year of diagnosis (1997-2015)**

| <b>Year of diagnosis</b> | <b>Average</b>  | <b>SD<sup>2</sup></b> | <b>Median</b>   | <b>Q1 - Q3<sup>3</sup></b> |
|--------------------------|-----------------|-----------------------|-----------------|----------------------------|
| 1997                     | S               | S                     | S               | S                          |
| 1998                     | \$19,304        | \$17,978              | \$14,946        | \$3,906 - \$39,061         |
| 1999                     | \$77,158        | \$62,950              | \$79,233        | \$13,197 - \$139,045       |
| 2000                     | S               | S                     | S               | S                          |
| 2002                     | \$50,274        | \$58,751              | \$50,274        | \$8,731 - \$91,817         |
| 2003                     | S               | S                     | S               | S                          |
| 2004                     | \$55,135        | \$67,206              | \$44,567        | \$11,136 - \$49,172        |
| 2005                     | \$63,491        | \$75,351              | \$63,491        | \$10,210 - \$116,772       |
| 2006                     | \$16,888        | \$15,179              | \$13,985        | \$3,370 - \$33,308         |
| 2007                     | \$68,051        | \$86,985              | \$22,064        | \$3,887 - \$162,416        |
| 2008                     | \$77,599        | \$81,087              | \$25,363        | \$21,683 - \$146,443       |
| 2009                     | \$63,569        | \$56,562              | \$62,118        | \$15,454 - \$111,684       |
| 2010                     | \$33,631        | \$15,111              | \$30,410        | \$21,421 - \$45,841        |
| 2011                     | \$2,545         | \$9,669               | \$1,543         | \$-5,670 - \$10,760        |
| 2012                     | \$32,871        | \$28,105              | \$32,871        | \$12,998 - \$52,745        |
| 2013                     | \$63,459        | \$35,796              | \$65,033        | \$28,606 - \$105,631       |
| 2014                     | \$8,800         | \$95,505              | \$70,718        | \$-36,877 - \$74,348       |
| 2015                     | \$19,846        | \$30,742              | \$9,710         | \$2,925 - \$18,377         |
| <b>Overall</b>           | <b>\$43,629</b> | <b>\$56,467</b>       | <b>\$23,712</b> | <b>\$10,213 - \$72,533</b> |

<sup>1</sup> The period for which costs were added was 180 days before to 730 days after diagnosis for invasive cancer; <sup>2</sup> Standard deviation; <sup>3</sup> Q1 and Q3 are the first and third quartile respectively; S = Suppressed

Supplementary Table 59 **Distribution of net direct medical cost<sup>1</sup> of invasive cancer of the oral cavity (for patients compared to their matches) in 2017 Canadian dollars among Manitoba males by year of diagnosis (1997-2015)**

| <b>Year of diagnosis</b> | <b>Average</b>  | <b>SD<sup>2</sup></b> | <b>Median</b>   | <b>Q1 - Q3<sup>3</sup></b> |
|--------------------------|-----------------|-----------------------|-----------------|----------------------------|
| 1997                     | \$21,847        | \$33,640              | \$20,146        | \$539 - \$34,934           |
| 1998                     | \$24,334        | \$37,284              | \$20,339        | \$4,918 - \$26,062         |
| 1999                     | \$31,933        | \$79,155              | \$15,470        | \$335 - \$47,945           |
| 2000                     | \$14,989        | \$33,380              | \$6,392         | \$-580 - \$18,573          |
| 2001                     | \$31,458        | \$37,492              | \$22,937        | \$3,112 - \$47,548         |
| 2002                     | \$25,684        | \$42,109              | \$27,341        | \$3,108 - \$52,256         |
| 2003                     | \$28,914        | \$35,140              | \$31,332        | \$16,367 - \$43,866        |
| 2004                     | \$73,368        | \$84,663              | \$30,992        | \$17,534 - \$85,703        |
| 2005                     | \$52,886        | \$40,064              | \$49,382        | \$16,501 - \$78,667        |
| 2006                     | \$39,716        | \$39,040              | \$28,578        | \$9,818 - \$70,880         |
| 2007                     | \$51,328        | \$74,801              | \$26,554        | \$8,826 - \$72,532         |
| 2008                     | \$78,373        | \$111,950             | \$61,977        | \$16,930 - \$93,706        |
| 2009                     | \$30,532        | \$53,812              | \$20,174        | \$2,147 - \$48,896         |
| 2010                     | \$59,460        | \$140,853             | \$29,892        | \$8,027 - \$64,587         |
| 2011                     | \$46,828        | \$44,642              | \$42,561        | \$14,433 - \$70,784        |
| 2012                     | \$45,102        | \$82,013              | \$15,167        | \$7,248 - \$43,695         |
| 2013                     | \$36,700        | \$33,765              | \$35,299        | \$8,088 - \$47,160         |
| 2014                     | \$34,341        | \$34,677              | \$19,282        | \$10,206 - \$47,549        |
| 2015                     | \$27,949        | \$37,108              | \$29,790        | \$9,247 - \$45,632         |
| <b>Overall</b>           | <b>\$40,669</b> | <b>\$67,962</b>       | <b>\$27,175</b> | <b>\$7,307 - \$57,202</b>  |

<sup>1</sup> The period for which costs were added was 180 days before to 730 days after diagnosis for invasive cancer; <sup>2</sup> Standard deviation; <sup>3</sup> Q1 and Q3 are the first and third quartile respectively

Supplementary Table 60 **Distribution of net direct medical cost<sup>1</sup> of invasive cancer of the oropharynx (for patients compared to their matches) in 2017 Canadian dollars among Manitoba males by year of diagnosis (1997-2015)**

| <b>Year of diagnosis</b> | <b>Average</b>  | <b>SD<sup>2</sup></b> | <b>Median</b>   | <b>Q1 - Q3<sup>3</sup></b> |
|--------------------------|-----------------|-----------------------|-----------------|----------------------------|
| 1997                     | \$15,635        | \$25,111              | \$15,236        | \$5,979 - \$26,010         |
| 1998                     | \$34,634        | \$66,401              | \$28,616        | \$9,672 - \$53,995         |
| 1999                     | \$35,369        | \$45,167              | \$27,997        | \$1,182 - \$69,854         |
| 2000                     | \$42,443        | \$56,695              | \$41,904        | \$22,992 - \$56,940        |
| 2001                     | \$77,767        | \$310,734             | \$21,286        | \$2,889 - \$43,330         |
| 2002                     | \$21,400        | \$24,544              | \$20,030        | \$6,444 - \$34,012         |
| 2003                     | \$11,998        | \$124,497             | \$19,261        | \$5,596 - \$47,405         |
| 2004                     | \$10,917        | \$28,731              | \$14,415        | \$-2,114 - \$21,970        |
| 2005                     | \$21,771        | \$51,238              | \$16,843        | \$4,645 - \$25,971         |
| 2006                     | \$17,778        | \$47,418              | \$6,291         | \$-2,372 - \$17,476        |
| 2007                     | \$28,568        | \$78,370              | \$12,892        | \$3,053 - \$32,445         |
| 2008                     | \$9,251         | \$34,842              | \$10,553        | \$-4,552 - \$22,945        |
| 2009                     | \$30,418        | \$68,177              | \$10,917        | \$2,028 - \$42,474         |
| 2010                     | \$20,232        | \$28,951              | \$11,153        | \$4,694 - \$28,693         |
| 2011                     | \$18,433        | \$27,674              | \$7,806         | \$4,587 - \$24,514         |
| 2012                     | \$23,389        | \$31,277              | \$11,593        | \$4,344 - \$29,873         |
| 2013                     | \$13,805        | \$36,676              | \$10,402        | \$709 - \$27,071           |
| 2014                     | \$17,402        | \$23,568              | \$11,673        | \$2,954 - \$20,254         |
| 2015                     | \$15,671        | \$19,315              | \$9,123         | \$4,740 - \$18,613         |
| <b>Overall</b>           | <b>\$23,530</b> | <b>\$84,366</b>       | <b>\$12,551</b> | <b>\$3,683 - \$29,873</b>  |

<sup>1</sup> The period for which costs were added was 180 days before to 730 days after diagnosis for invasive cancer; <sup>2</sup> Standard deviation; <sup>3</sup> Q1 and Q3 are the first and third quartile respectively

Supplementary Table 61 **Distribution of net direct medical cost<sup>1</sup> of invasive cancer of the penis (for patients compared to their matches) in 2017 Canadian dollars among Manitoba males by year of diagnosis (1997-2015)**

| <b>Year of diagnosis</b> | <b>Average</b>  | <b>SD<sup>2</sup></b> | <b>Median</b>  | <b>Q1 - Q3<sup>3</sup></b> |
|--------------------------|-----------------|-----------------------|----------------|----------------------------|
| 1997                     | \$110,095       | \$68,650              | \$110,095      | \$61,552 - \$158,637       |
| 1998                     | S               | S                     | S              | S                          |
| 1999                     | \$16,355        | \$28,533              | \$8,161        | \$1,308 - \$14,854         |
| 2000                     | \$7,300         | \$45,010              | \$18,573       | \$2,685 - \$24,807         |
| 2001                     | \$10,409        | \$28,597              | \$7,120        | \$4,537 - \$27,283         |
| 2002                     | \$44,463        | \$36,508              | \$45,229       | \$12,920 - \$76,006        |
| 2003                     | \$10,948        | \$28,026              | \$-92          | \$-5,465 - \$12,533        |
| 2004                     | \$9,305         | \$12,899              | \$4,736        | \$3,097 - \$5,043          |
| 2005                     | \$7,862         | \$11,432              | \$7,467        | \$-3,367 - \$19,487        |
| 2006                     | \$4,253         | \$6,779               | \$3,269        | \$-1,981 - \$11,469        |
| 2007                     | \$10,473        | \$9,764               | \$11,904       | \$4,937 - \$17,718         |
| 2008                     | \$3,751         | \$6,881               | \$4,340        | \$-2,146 - \$5,616         |
| 2009                     | \$20,798        | \$279                 | \$20,798       | \$20,601 - \$20,996        |
| 2010                     | \$-6,669        | \$32,583              | \$-6,669       | \$-29,709 - \$16,370       |
| 2011                     | \$16,962        | \$13,615              | \$16,264       | \$12,134 - \$16,718        |
| 2012                     | \$13,895        | \$10,260              | \$9,820        | \$9,411 - \$15,435         |
| 2013                     | \$6,205         | \$23,502              | \$9,417        | \$3,555 - \$19,514         |
| 2014                     | \$37,072        | \$45,472              | \$26,507       | \$4,353 - \$73,214         |
| 2015                     | \$14,037        | \$39,968              | \$7,224        | \$-5,487 - \$19,021        |
| <b>Overall</b>           | <b>\$16,486</b> | <b>\$33,336</b>       | <b>\$9,417</b> | <b>\$2,806 - \$21,572</b>  |

<sup>1</sup> The period for which costs were added was 180 days before to 730 days after diagnosis for invasive cancer; <sup>2</sup> Standard deviation; <sup>3</sup> Q1 and Q3 are the first and third quartile respectively; S = Suppressed

### Healthcare utilization

Supplementary Table 62 **Average number of healthcare encounters<sup>1</sup> (per year) of HPV-related disease patients and their matches among Manitoba males (1997-2015)**

| HPV-related disease                      | Patients         |                     |                        |               | Matches          |                     |                        |               |
|------------------------------------------|------------------|---------------------|------------------------|---------------|------------------|---------------------|------------------------|---------------|
|                                          | Clinician visits | Hospital admissions | ER visits <sup>2</sup> | Prescriptions | Clinician visits | Hospital admissions | ER visits <sup>2</sup> | Prescriptions |
| Anogenital warts                         | 8.9              | 0.2                 | 0.3                    | 8.9           | 4.3              | 0.1                 | 0.2                    | 6.3           |
| All HPV-related carcinoma <i>in situ</i> | 17.9             | 1.1                 | 0.5                    | 29.2          | 9.5              | 0.3                 | 0.4                    | 20.2          |
| All HPV-related invasive cancers         | 19.9             | 1.3                 | 0.8                    | 34.8          | 9.0              | 0.3                 | 0.3                    | 21.4          |
| Invasive cancer of the anus              | 24.7             | 1.9                 | 2.2                    | 94.6          | 8.1              | 0.2                 | 0.2                    | 20.0          |
| Invasive cancer of the oral cavity       | 19.8             | 1.3                 | 0.7                    | 32.5          | 9.1              | 0.3                 | 0.3                    | 20.7          |
| Invasive cancer of the oropharynx        | 20.0             | 1.3                 | 0.6                    | 27.0          | 8.7              | 0.3                 | 0.3                    | 20.0          |
| Invasive cancer of the penis             | 17.6             | 1.4                 | 0.6                    | 36.9          | 10.2             | 0.3                 | 0.4                    | 29.3          |
| <b>Total</b>                             | <b>10.5</b>      | <b>0.4</b>          | <b>0.4</b>             | <b>12.6</b>   | <b>4.9</b>       | <b>0.1</b>          | <b>0.2</b>             | <b>8.4</b>    |

<sup>1</sup> The periods for which encounters were averaged (as number per year) were 0 to 365 days after diagnosis for AGW and carcinoma *in situ* and 180 days before to 730 days after diagnosis for invasive cancer;

<sup>2</sup> ER visits are for the Winnipeg Regional Health Authority only

Supplementary Table 63 **Excess number of healthcare encounters<sup>1</sup> (per year) due to HPV-related diseases (for patients compared to their matches) among Manitoba males (1997-2015)**

| <b>HPV-related disease</b>               | <b>Clinician visits</b> | <b>Hospital admissions</b> | <b>ER visits<sup>2</sup></b> | <b>Prescriptions</b> |
|------------------------------------------|-------------------------|----------------------------|------------------------------|----------------------|
| Anogenital warts                         | 67,637                  | 2,218                      | 1,118                        | 35,618               |
| All HPV-related carcinoma <i>in situ</i> | 733                     | 66                         | -3                           | 811                  |
| All HPV-related invasive cancers         | 11,665                  | 1,174                      | 319                          | 13,811               |
| Invasive cancer of the anus              | 1,167                   | 126                        | 107                          | 5,747                |
| Invasive cancer of the oral cavity       | 4,330                   | 425                        | 88                           | 5,107                |
| Invasive cancer of the oropharynx        | 5,224                   | 478                        | 113                          | 2,089                |
| Invasive cancer of the penis             | 943                     | 145                        | 11                           | 868                  |
| <b>Total</b>                             | <b>80,034</b>           | <b>3,458</b>               | <b>1,434</b>                 | <b>50,239</b>        |

<sup>1</sup> The periods for which encounters were averaged (as number per year) were 0 to 365 days after diagnosis for AGW and carcinoma *in situ* and 180 days before to 730 days after diagnosis for invasive cancer;

<sup>2</sup> ER visits are for the Winnipeg Regional Health Authority only



Supplementary Table 64 **Distribution of excess number of healthcare encounters<sup>1</sup> (per year) due to HPV-related diseases (for patients compared to their matches) among Manitoba males (1997-2015)**

| <b>HPV-related disease</b>               | <b>Average</b> | <b>SD<sup>2</sup></b> | <b>Median</b> | <b>Q1 - Q3<sup>3</sup></b> |
|------------------------------------------|----------------|-----------------------|---------------|----------------------------|
| <b>Excess clinician visits</b>           |                |                       |               |                            |
| Anogenital warts                         | 4.6            | 9.7                   | 3.0           | -0.3 - 7.7                 |
| All HPV-related carcinoma <i>in situ</i> | 8.6            | 11.1                  | 4.8           | 1.2 - 15.8                 |
| All HPV-related invasive cancers         | 10.2           | 15.4                  | 8.8           | 3.0 - 16.7                 |
| Invasive cancer of the anus              | 16.2           | 20.6                  | 14.4          | 6.9 - 23.6                 |
| Invasive cancer of the oral cavity       | 10.1           | 16.2                  | 8.1           | 2.1 - 15.5                 |
| Invasive cancer of the oropharynx        | 10.2           | 13.8                  | 9.3           | 3.7 - 17.5                 |
| Invasive cancer of the penis             | 6.8            | 14.7                  | 6.5           | 0.7 - 12.9                 |
| <b>Excess hospital admissions</b>        |                |                       |               |                            |
| Anogenital warts                         | 0.2            | 0.7                   | 0.0           | 0.0 - 0.0                  |
| All HPV-related carcinoma <i>in situ</i> | 0.8            | 1.0                   | 0.7           | 0.0 - 1.3                  |
| All HPV-related invasive cancers         | 1.0            | 1.2                   | 0.8           | 0.4 - 1.6                  |
| Invasive cancer of the anus              | 1.8            | 1.6                   | 1.4           | 0.7 - 2.4                  |
| Invasive cancer of the oral cavity       | 1.0            | 1.1                   | 0.8           | 0.4 - 1.6                  |
| Invasive cancer of the oropharynx        | 0.9            | 1.2                   | 0.7           | 0.3 - 1.4                  |
| Invasive cancer of the penis             | 1.0            | 1.0                   | 0.8           | 0.4 - 1.6                  |
| <b>Excess ER visits<sup>4</sup></b>      |                |                       |               |                            |
| Anogenital warts                         | 0.1            | 1.2                   | 0.0           | -0.3 - 0.0                 |
| All HPV-related carcinoma <i>in situ</i> | -0.0           | 1.3                   | 0.0           | -0.3 - 0.0                 |
| All HPV-related invasive cancers         | 0.5            | 2.1                   | 0.0           | -0.1 - 0.5                 |
| Invasive cancer of the anus              | 2.2            | 6.2                   | 0.4           | 0.0 - 1.5                  |
| Invasive cancer of the oral cavity       | 0.3            | 1.4                   | 0.0           | -0.1 - 0.5                 |
| Invasive cancer of the oropharynx        | 0.4            | 1.2                   | 0.0           | -0.1 - 0.4                 |
| Invasive cancer of the penis             | 0.2            | 0.8                   | 0.0           | -0.1 - 0.4                 |
| <b>Excess prescriptions</b>              |                |                       |               |                            |
| Anogenital warts                         | 2.4            | 25.9                  | 0.0           | -2.3 - 4.0                 |
| All HPV-related carcinoma <i>in situ</i> | 9.6            | 49.6                  | 1.8           | -10.0 - 14.2               |
| All HPV-related invasive cancers         | 12.2           | 91.5                  | 6.0           | -7.9 - 24.6                |
| Invasive cancer of the anus              | 79.8           | 266.5                 | 9.2           | -1.5 - 46.8                |
| Invasive cancer of the oral cavity       | 11.9           | 67.3                  | 6.8           | -7.9 - 25.0                |
| Invasive cancer of the oropharynx        | 4.1            | 58.5                  | 4.9           | -7.1 - 20.9                |
| Invasive cancer of the penis             | 6.3            | 50.6                  | 1.2           | -15.1 - 28.0               |

<sup>1</sup> The periods for which encounters were averaged (as number per year) were 0 to 365 days after diagnosis for AGW and carcinoma *in situ* and 180 days before to 730 days after diagnosis for invasive cancer; <sup>2</sup> Standard deviation; <sup>3</sup> Q1 and Q3 are the first and third quartile respectively; <sup>4</sup> ER visits are for the Winnipeg Regional Health Authority only

### Excess healthcare utilization by age

Supplementary Table 65 **Distribution of excess number of clinician visits<sup>1</sup> (per year) due to anogenital warts (for patients compared to their matches) among Manitoba males by age group (1997-2015).**

| Age (years)    | Average    | SD <sup>2</sup> | Median     | Q1 - Q3 <sup>3</sup> |
|----------------|------------|-----------------|------------|----------------------|
| 9 - 17         | 3.5        | 5.8             | 2.3        | 0.0 - 6.0            |
| 18 - 30        | 4.2        | 7.4             | 3.0        | 0.3 - 6.7            |
| 31 - 50        | 4.7        | 10.5            | 2.7        | -0.7 - 8.3           |
| 51 - 64        | 6.2        | 14.9            | 4.0        | -1.0 - 11.0          |
| ≥65            | 6.7        | 18.0            | 5.3        | -1.3 - 14.0          |
| <b>Overall</b> | <b>4.6</b> | <b>9.7</b>      | <b>3.0</b> | <b>-0.3 - 7.7</b>    |

<sup>1</sup> The period for which encounters were averaged (as number per year) was 0 to 365 days after diagnosis for AGW; <sup>2</sup> Standard deviation; <sup>3</sup> Q1 and Q3 are the first and third quartile respectively

Supplementary Table 66 **Distribution of excess number of hospital admissions<sup>1</sup> (per year) due to anogenital warts (for patients compared to their matches) among Manitoba males by age group (1997-2015).**

| Age (years)    | Average    | SD <sup>2</sup> | Median     | Q1 - Q3 <sup>3</sup> |
|----------------|------------|-----------------|------------|----------------------|
| 9 - 17         | 0.2        | 0.6             | 0.0        | 0.0 - 0.0            |
| 18 - 30        | 0.1        | 0.5             | 0.0        | 0.0 - 0.0            |
| 31 - 50        | 0.2        | 0.7             | 0.0        | 0.0 - 0.0            |
| 51 - 64        | 0.3        | 1.1             | 0.0        | 0.0 - 0.7            |
| ≥65            | 0.6        | 1.3             | 0.0        | 0.0 - 1.0            |
| <b>Overall</b> | <b>0.2</b> | <b>0.7</b>      | <b>0.0</b> | <b>0.0 - 0.0</b>     |

<sup>1</sup> The period for which encounters were averaged (as number per year) was 0 to 365 days after diagnosis for AGW; <sup>2</sup> Standard deviation; <sup>3</sup> Q1 and Q3 are the first and third quartile respectively

Supplementary Table 67 **Distribution of excess number of ER visits<sup>1,2</sup> (per year) due to anogenital warts (for patients compared to their matches) among Manitoba males by age group (1997-2015).**

| Age (years) | Average | SD <sup>3</sup> | Median | Q1 - Q3 <sup>4</sup> |
|-------------|---------|-----------------|--------|----------------------|
| 9 - 17      | 0.1     | 1.0             | 0.0    | -0.3 - 0.0           |
| 18 - 30     | 0.1     | 1.0             | 0.0    | -0.3 - 0.0           |
| 31 - 50     | 0.1     | 1.3             | 0.0    | -0.3 - 0.0           |

|                |            |            |            |                   |
|----------------|------------|------------|------------|-------------------|
| 51 - 64        | 0.1        | 1.1        | 0.0        | -0.3 - 0.0        |
| ≥65            | 0.2        | 3.1        | 0.0        | -0.3 - 0.0        |
| <b>Overall</b> | <b>0.1</b> | <b>1.2</b> | <b>0.0</b> | <b>-0.3 - 0.0</b> |

<sup>1</sup> ER visits are for the Winnipeg Regional Health Authority only; <sup>2</sup> The period for which encounters were averaged (as number per year) was 0 to 365 days after diagnosis for AGW; <sup>3</sup> Standard deviation; <sup>4</sup> Q1 and Q3 are the first and third quartile respectively

Supplementary Table 68 **Distribution of excess number of prescriptions<sup>1</sup> (per year) due to anogenital warts (for patients compared to their matches) among Manitoba males by age group (1997-2015).**

| Age (years)    | Average    | SD <sup>2</sup> | Median     | Q1 - Q3 <sup>3</sup> |
|----------------|------------|-----------------|------------|----------------------|
| 9 - 17         | 0.9        | 9.5             | 0.0        | -1.7 - 2.7           |
| 18 - 30        | 1.0        | 14.0            | 0.0        | -1.7 - 3.0           |
| 31 - 50        | 3.4        | 29.9            | 0.0        | -3.3 - 5.3           |
| 51 - 64        | 7.1        | 44.0            | 1.0        | -8.7 - 15.0          |
| ≥65            | 4.5        | 61.4            | 2.0        | -12.3 - 25.7         |
| <b>Overall</b> | <b>2.4</b> | <b>25.9</b>     | <b>0.0</b> | <b>-2.3 - 4.0</b>    |

<sup>1</sup> The period for which encounters were averaged (as number per year) was 0 to 365 days after diagnosis for AGW; <sup>2</sup> Standard deviation; <sup>3</sup> Q1 and Q3 are the first and third quartile respectively

Supplementary Table 69 **Distribution of excess number of clinician visits<sup>1</sup> (per year) due to HPV-related carcinoma *in situ* (for patients compared to their matches) among Manitoba males by age group (1997-2015).**

| Age (years)    | Average    | SD <sup>2</sup> | Median     | Q1 - Q3 <sup>3</sup> |
|----------------|------------|-----------------|------------|----------------------|
| 18 - 30        | 5.3        | 7.9             | 4.3        | 1.7 - 9.0            |
| 31 - 50        | 8.8        | 11.8            | 4.3        | 1.3 - 14.5           |
| 51 - 64        | 5.2        | 7.7             | 4.0        | -0.8 - 11.5          |
| ≥65            | 12.6       | 13.2            | 14.0       | 3.3 - 20.7           |
| <b>Overall</b> | <b>8.6</b> | <b>11.1</b>     | <b>4.8</b> | <b>1.2 - 15.8</b>    |

<sup>1</sup> The period for which encounters were averaged (as number per year) was 0 to 365 days after diagnosis for carcinoma *in situ*; <sup>2</sup> Standard deviation; <sup>3</sup> Q1 and Q3 are the first and third quartile respectively

Supplementary Table 70 **Distribution of excess number of hospital admissions<sup>1</sup> (per year) due to HPV-related carcinoma *in situ* (for patients compared to their matches) among Manitoba males by age group (1997-2015).**

| Age (years) | Average | SD <sup>2</sup> | Median | Q1 - Q3 <sup>3</sup> |
|-------------|---------|-----------------|--------|----------------------|
|-------------|---------|-----------------|--------|----------------------|

|                |            |            |            |                  |
|----------------|------------|------------|------------|------------------|
| 18 - 30        | 0.3        | 0.9        | 0.0        | 0.0 - 1.0        |
| 31 - 50        | 0.6        | 0.9        | 0.0        | 0.0 - 1.5        |
| 51 - 64        | 0.8        | 0.8        | 0.7        | 0.3 - 1.0        |
| ≥65            | 0.9        | 1.3        | 1.0        | -0.3 - 1.7       |
| <b>Overall</b> | <b>0.8</b> | <b>1.0</b> | <b>0.7</b> | <b>0.0 - 1.3</b> |

<sup>1</sup> The period for which encounters were averaged (as number per year) was 0 to 365 days after diagnosis for carcinoma *in situ*; <sup>2</sup> Standard deviation; <sup>3</sup> Q1 and Q3 are the first and third quartile respectively

Supplementary Table 71 **Distribution of excess number of ER visits<sup>1,2</sup> (per year) due to HPV-related carcinoma *in situ* (for patients compared to their matches) among Manitoba males by age group (1997-2015).**

| Age (years)    | Average     | SD <sup>3</sup> | Median     | Q1 - Q3 <sup>4</sup> |
|----------------|-------------|-----------------|------------|----------------------|
| 18 - 30        | 0.1         | 2.3             | -0.7       | -0.7 - -0.3          |
| 31 - 50        | 0.3         | 0.9             | 0.0        | 0.0 - 0.7            |
| 51 - 64        | -0.2        | 0.5             | 0.0        | -0.3 - 0.0           |
| ≥65            | -0.1        | 1.8             | 0.0        | -0.8 - 0.8           |
| <b>Overall</b> | <b>-0.0</b> | <b>1.3</b>      | <b>0.0</b> | <b>-0.3 - 0.0</b>    |

<sup>1</sup> ER visits are for the Winnipeg Regional Health Authority only; <sup>2</sup> The period for which encounters were averaged (as number per year) was 0 to 365 days after diagnosis for carcinoma *in situ*; <sup>3</sup> Standard deviation; <sup>4</sup> Q1 and Q3 are the first and third quartile respectively

Supplementary Table 72 **Distribution of excess number of prescriptions<sup>1</sup> (per year) due to HPV-related carcinoma *in situ* (for patients compared to their matches) among Manitoba males by age group (1997-2015).**

| Age (years)    | Average    | SD <sup>2</sup> | Median     | Q1 - Q3 <sup>3</sup> |
|----------------|------------|-----------------|------------|----------------------|
| 18 - 30        | -7.0       | 25.1            | 0.7        | -1.0 - 4.3           |
| 31 - 50        | 21.8       | 41.7            | 5.2        | 0.2 - 23.7           |
| 51 - 64        | 9.2        | 39.9            | -0.5       | -10.0 - 7.0          |
| ≥65            | 7.2        | 64.6            | 4.3        | -23.0 - 27.7         |
| <b>Overall</b> | <b>9.6</b> | <b>49.6</b>     | <b>1.8</b> | <b>-10.0 - 14.2</b>  |

<sup>1</sup> The period for which encounters were averaged (as number per year) was 0 to 365 days after diagnosis for carcinoma *in situ*; <sup>2</sup> Standard deviation; <sup>3</sup> Q1 and Q3 are the first and third quartile respectively

Supplementary Table 73 **Distribution of excess number of clinician visits<sup>1</sup> (per year) due to HPV-related invasive cancer (for patients compared to their matches) among Manitoba males by age group (1997-2015).**

| Age (years)    | Average     | SD <sup>2</sup> | Median     | Q1 - Q3 <sup>3</sup> |
|----------------|-------------|-----------------|------------|----------------------|
| 18 - 30        | 12.6        | 8.0             | 6.9        | 6.9 - 18.5           |
| 31 - 50        | 12.6        | 16.9            | 9.5        | 4.4 - 17.5           |
| 51 - 64        | 10.5        | 12.8            | 9.2        | 3.6 - 16.6           |
| ≥65            | 8.7         | 17.2            | 7.9        | 1.5 - 15.6           |
| <b>Overall</b> | <b>10.2</b> | <b>15.4</b>     | <b>8.8</b> | <b>3.0 - 16.7</b>    |

<sup>1</sup> The periods for which encounters were averaged (as number per year) was 180 days before to 730 days after diagnosis for invasive cancer; <sup>2</sup> Standard deviation; <sup>3</sup> Q1 and Q3 are the first and third quartile respectively

Supplementary Table 74 **Distribution of excess number of hospital admissions<sup>1</sup> (per year) due to HPV-related invasive cancer (for patients compared to their matches) among Manitoba males by age group (1997-2015).**

| Age (years)    | Average    | SD <sup>2</sup> | Median     | Q1 - Q3 <sup>3</sup> |
|----------------|------------|-----------------|------------|----------------------|
| 18 - 30        | 1.1        | 0.6             | 1.1        | 0.8 - 1.6            |
| 31 - 50        | 1.1        | 1.2             | 0.8        | 0.4 - 1.5            |
| 51 - 64        | 1.0        | 1.0             | 0.8        | 0.4 - 1.5            |
| ≥65            | 1.0        | 1.3             | 0.8        | 0.2 - 1.6            |
| <b>Overall</b> | <b>1.0</b> | <b>1.2</b>      | <b>0.8</b> | <b>0.4 - 1.6</b>     |

<sup>1</sup> The periods for which encounters were averaged (as number per year) was 180 days before to 730 days after diagnosis for invasive cancer; <sup>2</sup> Standard deviation; <sup>3</sup> Q1 and Q3 are the first and third quartile respectively

Supplementary Table 75 **Distribution of excess number of ER visits<sup>1,2</sup> (per year) due to HPV-related invasive cancer (for patients compared to their matches) among Manitoba males by age group (1997-2015).**

| Age (years)    | Average    | SD <sup>3</sup> | Median     | Q1 - Q3 <sup>4</sup> |
|----------------|------------|-----------------|------------|----------------------|
| 18 - 30        | 1.2        | 1.3             | 1.2        | 0.3 - 2.1            |
| 31 - 50        | 0.7        | 3.9             | 0.0        | -0.1 - 0.4           |
| 51 - 64        | 0.4        | 1.4             | 0.1        | -0.1 - 0.5           |
| ≥65            | 0.4        | 1.7             | 0.0        | -0.1 - 0.8           |
| <b>Overall</b> | <b>0.5</b> | <b>2.1</b>      | <b>0.0</b> | <b>-0.1 - 0.5</b>    |

<sup>1</sup> ER visits are for the Winnipeg Regional Health Authority only; <sup>2</sup> The periods for which encounters were averaged (as number per year) was 180 days before to 730 days after diagnosis for invasive cancer; <sup>3</sup> Standard deviation; <sup>4</sup> Q1 and Q3 are the first and third quartile respectively

Supplementary Table 76 **Distribution of excess number of prescriptions<sup>1</sup> (per year) due to HPV-related invasive cancer (for patients compared to their matches) among Manitoba males by age group (1997-2015).**

| Age (years)    | Average     | SD <sup>2</sup> | Median     | Q1 - Q3 <sup>3</sup> |
|----------------|-------------|-----------------|------------|----------------------|
| 18 - 30        | 13.4        | 11.2            | 16.9       | 1.6 - 21.2           |
| 31 - 50        | 16.2        | 33.7            | 6.2        | -0.4 - 23.5          |
| 51 - 64        | 17.9        | 112.0           | 6.3        | -5.9 - 22.7          |
| ≥65            | 4.1         | 84.2            | 3.6        | -15.6 - 26.5         |
| <b>Overall</b> | <b>12.2</b> | <b>91.5</b>     | <b>6.0</b> | <b>-7.9 - 24.6</b>   |



<sup>1</sup> The periods for which encounters were averaged (as number per year) was 180 days before to 730 days after diagnosis for invasive cancer; <sup>2</sup> Standard deviation; <sup>3</sup> Q1 and Q3 are the first and third quartile respectively

Supplementary Table 77 **Distribution of excess number of clinician visits<sup>1</sup> (per year) due to invasive cancer of the anus (for patients compared to their matches) among Manitoba males by age group (1997-2015).**

| Age (years)    | Average     | SD <sup>2</sup> | Median      | Q1 - Q3 <sup>3</sup> |
|----------------|-------------|-----------------|-------------|----------------------|
| 31 - 50        | 27.1        | 25.7            | 16.1        | 11.7 - 30.7          |
| 51 - 64        | 13.0        | 12.0            | 10.3        | 5.0 - 18.9           |
| ≥65            | 14.8        | 26.4            | 13.2        | 10.3 - 26.0          |
| <b>Overall</b> | <b>16.2</b> | <b>20.6</b>     | <b>14.4</b> | <b>6.9 - 23.6</b>    |

<sup>1</sup> The periods for which encounters were averaged (as number per year) was 180 days before to 730 days after diagnosis for invasive cancer; <sup>2</sup> Standard deviation; <sup>3</sup> Q1 and Q3 are the first and third quartile respectively

Supplementary Table 78 **Distribution of excess number of hospital admissions<sup>1</sup> (per year) due to invasive cancer of the anus (for patients compared to their matches) among Manitoba males by age group (1997-2015).**

| Age (years)    | Average    | SD <sup>2</sup> | Median     | Q1 - Q3 <sup>3</sup> |
|----------------|------------|-----------------|------------|----------------------|
| 31 - 50        | 2.5        | 2.6             | 1.8        | 0.8 - 2.9            |
| 51 - 64        | 1.5        | 1.3             | 1.3        | 0.5 - 2.4            |
| ≥65            | 1.6        | 1.0             | 1.5        | 0.8 - 2.2            |
| <b>Overall</b> | <b>1.8</b> | <b>1.6</b>      | <b>1.4</b> | <b>0.7 - 2.4</b>     |

<sup>1</sup> The periods for which encounters were averaged (as number per year) was 180 days before to 730 days after diagnosis for invasive cancer; <sup>2</sup> Standard deviation; <sup>3</sup> Q1 and Q3 are the first and third quartile respectively

Supplementary Table 79 **Distribution of excess number of ER visits<sup>1,2</sup> (per year) due to invasive cancer of the anus (for patients compared to their matches) among Manitoba males by age group (1997-2015).**

| Age (years)    | Average    | SD <sup>3</sup> | Median     | Q1 - Q3 <sup>4</sup> |
|----------------|------------|-----------------|------------|----------------------|
| 31 - 50        | 6.1        | 12.5            | 1.5        | 0.0 - 4.0            |
| 51 - 64        | 1.3        | 3.2             | 0.5        | 0.0 - 1.2            |
| ≥65            | 1.2        | 2.7             | 0.4        | 0.1 - 1.2            |
| <b>Overall</b> | <b>2.2</b> | <b>6.2</b>      | <b>0.4</b> | <b>0.0 - 1.5</b>     |

<sup>1</sup> ER visits are for the Winnipeg Regional Health Authority only; <sup>2</sup> The periods for which encounters were averaged (as number per year) was 180 days before to 730 days after diagnosis for invasive cancer; <sup>3</sup> Standard deviation; <sup>4</sup> Q1 and Q3 are the first and third quartile respectively

Supplementary Table 80 **Distribution of excess number of prescriptions<sup>1</sup> (per year) due to invasive cancer of the anus (for patients compared to their matches) among Manitoba males by age group (1997-2015).**

| Age (years)    | Average     | SD <sup>2</sup> | Median     | Q1 - Q3 <sup>3</sup> |
|----------------|-------------|-----------------|------------|----------------------|
| 31 - 50        | 56.1        | 58.1            | 38.9       | 8.4 - 94.2           |
| 51 - 64        | 122.7       | 367.8           | 6.5        | -8.1 - 61.6          |
| ≥65            | 25.4        | 79.0            | 8.1        | -0.8 - 27.0          |
| <b>Overall</b> | <b>79.8</b> | <b>266.5</b>    | <b>9.2</b> | <b>-1.5 - 46.8</b>   |

<sup>1</sup> The periods for which encounters were averaged (as number per year) was 180 days before to 730 days after diagnosis for invasive cancer; <sup>2</sup> Standard deviation; <sup>3</sup> Q1 and Q3 are the first and third quartile respectively

Supplementary Table 81 **Distribution of excess number of clinician visits<sup>1</sup> (per year) due to invasive cancer of the oral cavity (for patients compared to their matches) among Manitoba males by age group (1997-2015).**

| Age (years)    | Average     | SD <sup>2</sup> | Median     | Q1 - Q3 <sup>3</sup> |
|----------------|-------------|-----------------|------------|----------------------|
| 18 - 30        | 15.2        | 11.9            | 15.2       | 6.8 - 23.6           |
| 31 - 50        | 11.9        | 22.3            | 8.3        | 3.0 - 12.7           |
| 51 - 64        | 9.6         | 13.8            | 8.6        | 2.4 - 16.4           |
| ≥65            | 9.8         | 15.7            | 7.8        | 1.2 - 15.4           |
| <b>Overall</b> | <b>10.1</b> | <b>16.2</b>     | <b>8.1</b> | <b>2.1 - 15.5</b>    |

<sup>1</sup> The periods for which encounters were averaged (as number per year) was 180 days before to 730 days after diagnosis for invasive cancer; <sup>2</sup> Standard deviation; <sup>3</sup> Q1 and Q3 are the first and third quartile respectively

Supplementary Table 82 **Distribution of excess number of hospital admissions<sup>1</sup> (per year) due to invasive cancer of the oral cavity (for patients compared to their matches) among Manitoba males by age group (1997-2015).**

| Age (years)    | Average    | SD <sup>2</sup> | Median     | Q1 - Q3 <sup>3</sup> |
|----------------|------------|-----------------|------------|----------------------|
| 18 - 30        | 1.1        | 0.9             | 1.1        | 0.4 - 1.7            |
| 31 - 50        | 0.9        | 0.9             | 0.7        | 0.4 - 1.3            |
| 51 - 64        | 0.9        | 0.9             | 0.8        | 0.4 - 1.6            |
| ≥65            | 1.1        | 1.4             | 0.8        | 0.3 - 1.6            |
| <b>Overall</b> | <b>1.0</b> | <b>1.1</b>      | <b>0.8</b> | <b>0.4 - 1.6</b>     |

<sup>1</sup> The periods for which encounters were averaged (as number per year) was 180 days before to 730 days after diagnosis for invasive cancer; <sup>2</sup> Standard deviation; <sup>3</sup> Q1 and Q3 are the first and third quartile respectively

Supplementary Table 83 **Distribution of excess number of ER visits<sup>1,2</sup> (per year) due to invasive cancer of the oral cavity (for patients compared to their matches) among Manitoba males by age group (1997-2015).**

| <b>Age (years)</b> | <b>Average</b> | <b>SD<sup>3</sup></b> | <b>Median</b> | <b>Q1 - Q3<sup>4</sup></b> |
|--------------------|----------------|-----------------------|---------------|----------------------------|
| 18 - 30            | 2.1            |                       | 2.1           | 2.1 - 2.1                  |
| 31 - 50            | 0.2            | 0.8                   | 0.0           | -0.1 - 0.6                 |
| 51 - 64            | 0.2            | 1.0                   | 0.0           | -0.1 - 0.4                 |
| ≥65                | 0.5            | 1.9                   | 0.0           | -0.2 - 0.7                 |
| <b>Overall</b>     | <b>0.3</b>     | <b>1.4</b>            | <b>0.0</b>    | <b>-0.1 - 0.5</b>          |

<sup>1</sup> ER visits are for the Winnipeg Regional Health Authority only; <sup>2</sup> The periods for which encounters were averaged (as number per year) was 180 days before to 730 days after diagnosis for invasive cancer; <sup>3</sup> Standard deviation; <sup>4</sup> Q1 and Q3 are the first and third quartile respectively

Supplementary Table 84 **Distribution of excess number of prescriptions<sup>1</sup> (per year) due to invasive cancer of the oral cavity (for patients compared to their matches) among Manitoba males by age group (1997-2015).**

| Age (years)    | Average     | SD <sup>2</sup> | Median     | Q1 - Q3 <sup>3</sup> |
|----------------|-------------|-----------------|------------|----------------------|
| 18 - 30        | 11.3        | 14.0            | 11.3       | 1.5 - 21.2           |
| 31 - 50        | 11.7        | 35.5            | 1.7        | -3.4 - 21.9          |
| 51 - 64        | 10.1        | 44.5            | 9.7        | -2.3 - 24.0          |
| ≥65            | 13.6        | 90.8            | 7.4        | -13.3 - 28.4         |
| <b>Overall</b> | <b>11.9</b> | <b>67.3</b>     | <b>6.8</b> | <b>-7.9 - 25.0</b>   |

<sup>1</sup> The periods for which encounters were averaged (as number per year) was 180 days before to 730 days after diagnosis for invasive cancer; <sup>2</sup> Standard deviation; <sup>3</sup> Q1 and Q3 are the first and third quartile respectively

Supplementary Table 85 **Distribution of excess number of clinician visits<sup>1</sup> (per year) due to invasive cancer of the oropharynx (for patients compared to their matches) among Manitoba males by age group (1997-2015).**

| Age (years)    | Average     | SD <sup>2</sup> | Median     | Q1 - Q3 <sup>3</sup> |
|----------------|-------------|-----------------|------------|----------------------|
| 31 - 50        | 11.8        | 9.6             | 10.3       | 5.7 - 17.9           |
| 51 - 64        | 11.4        | 11.8            | 9.5        | 4.5 - 16.8           |
| ≥65            | 7.5         | 17.9            | 7.6        | 2.3 - 16.9           |
| <b>Overall</b> | <b>10.2</b> | <b>13.8</b>     | <b>9.3</b> | <b>3.7 - 17.5</b>    |

<sup>1</sup> The periods for which encounters were averaged (as number per year) was 180 days before to 730 days after diagnosis for invasive cancer; <sup>2</sup> Standard deviation; <sup>3</sup> Q1 and Q3 are the first and third quartile respectively

Supplementary Table 86 **Distribution of excess number of hospital admissions<sup>1</sup> (per year) due to invasive cancer of the oropharynx (for patients compared to their matches) among Manitoba males by age group (1997-2015).**

| Age (years)    | Average    | SD <sup>2</sup> | Median     | Q1 - Q3 <sup>3</sup> |
|----------------|------------|-----------------|------------|----------------------|
| 31 - 50        | 1.1        | 1.0             | 0.8        | 0.4 - 1.3            |
| 51 - 64        | 0.9        | 1.1             | 0.7        | 0.3 - 1.3            |
| ≥65            | 0.9        | 1.4             | 0.5        | 0.0 - 1.6            |
| <b>Overall</b> | <b>0.9</b> | <b>1.2</b>      | <b>0.7</b> | <b>0.3 - 1.4</b>     |

<sup>1</sup> The periods for which encounters were averaged (as number per year) was 180 days before to 730 days after diagnosis for invasive cancer; <sup>2</sup> Standard deviation; <sup>3</sup> Q1 and Q3 are the first and third quartile respectively

Supplementary Table 87 **Distribution of excess number of ER visits<sup>1,2</sup> (per year) due to invasive cancer of the oropharynx (for patients compared to their matches) among Manitoba males by age group (1997-2015).**

| Age (years)    | Average    | SD <sup>3</sup> | Median     | Q1 - Q3 <sup>4</sup> |
|----------------|------------|-----------------|------------|----------------------|
| 31 - 50        | 0.2        | 0.8             | 0.0        | -0.1 - 0.4           |
| 51 - 64        | 0.4        | 1.2             | 0.1        | 0.0 - 0.4            |
| ≥65            | 0.3        | 1.5             | 0.0        | -0.2 - 0.8           |
| <b>Overall</b> | <b>0.4</b> | <b>1.2</b>      | <b>0.0</b> | <b>-0.1 - 0.4</b>    |

<sup>1</sup> ER visits are for the Winnipeg Regional Health Authority only; <sup>2</sup> The periods for which encounters were averaged (as number per year) was 180 days before to 730 days after diagnosis for invasive cancer; <sup>3</sup> Standard deviation; <sup>4</sup> Q1 and Q3 are the first and third quartile respectively

Supplementary Table 88 **Distribution of excess number of prescriptions<sup>1</sup> (per year) due to invasive cancer of the oropharynx (for patients compared to their matches) among Manitoba males by age group (1997-2015).**

| Age (years)    | Average    | SD <sup>2</sup> | Median     | Q1 - Q3 <sup>3</sup> |
|----------------|------------|-----------------|------------|----------------------|
| 31 - 50        | 15.0       | 25.6            | 7.3        | 0.9 - 22.5           |
| 51 - 64        | 8.6        | 40.9            | 4.9        | -5.9 - 20.7          |
| ≥65            | -9.9       | 87.6            | 1.6        | -22.1 - 21.2         |
| <b>Overall</b> | <b>4.1</b> | <b>58.5</b>     | <b>4.9</b> | <b>-7.1 - 20.9</b>   |

<sup>1</sup> The periods for which encounters were averaged (as number per year) was 180 days before to 730 days after diagnosis for invasive cancer; <sup>2</sup> Standard deviation; <sup>3</sup> Q1 and Q3 are the first and third quartile respectively

Supplementary Table 89 **Distribution of excess number of clinician visits<sup>1</sup> (per year) due to invasive cancer of the penis (for patients compared to their matches) among Manitoba males by age group (1997-2015).**

| Age (years)    | Average    | SD <sup>2</sup> | Median     | Q1 - Q3 <sup>3</sup> |
|----------------|------------|-----------------|------------|----------------------|
| 18 - 30        | 10.8       | 6.7             | 6.9        | 6.9 - 18.5           |
| 31 - 50        | 8.3        | 10.9            | 5.7        | 2.4 - 16.3           |
| 51 - 64        | 5.2        | 14.5            | 6.4        | 0.7 - 11.5           |
| ≥65            | 7.0        | 15.7            | 6.5        | -0.3 - 13.2          |
| <b>Overall</b> | <b>6.8</b> | <b>14.7</b>     | <b>6.5</b> | <b>0.7 - 12.9</b>    |

<sup>1</sup> The periods for which encounters were averaged (as number per year) was 180 days before to 730 days after diagnosis for invasive cancer; <sup>2</sup> Standard deviation; <sup>3</sup> Q1 and Q3 are the first and third quartile respectively

Supplementary Table 90 **Distribution of excess number of hospital admissions<sup>1</sup> (per year) due to invasive cancer of the penis (for patients compared to their matches) among Manitoba males by age group (1997-2015).**

| Age (years)    | Average    | SD <sup>2</sup> | Median     | Q1 - Q3 <sup>3</sup> |
|----------------|------------|-----------------|------------|----------------------|
| 18 - 30        | 1.2        | 0.4             | 1.1        | 0.8 - 1.6            |
| 31 - 50        | 1.1        | 1.1             | 0.7        | 0.4 - 1.3            |
| 51 - 64        | 1.0        | 1.0             | 0.7        | 0.4 - 1.2            |
| ≥65            | 1.1        | 1.0             | 0.8        | 0.4 - 1.6            |
| <b>Overall</b> | <b>1.0</b> | <b>1.0</b>      | <b>0.8</b> | <b>0.4 - 1.6</b>     |

<sup>1</sup> The periods for which encounters were averaged (as number per year) was 180 days before to 730 days after diagnosis for invasive cancer; <sup>2</sup> Standard deviation; <sup>3</sup> Q1 and Q3 are the first and third quartile respectively

Supplementary Table 91 **Distribution of excess number of ER visits<sup>1,2</sup> (per year) due to invasive cancer of the penis (for patients compared to their matches) among Manitoba males by age group (1997-2015).**

| Age (years)    | Average    | SD <sup>3</sup> | Median     | Q1 - Q3 <sup>4</sup> |
|----------------|------------|-----------------|------------|----------------------|
| 18 - 30        | 0.3        |                 | 0.3        | 0.3 - 0.3            |
| 31 - 50        | 0.1        | 0.2             | 0.0        | 0.0 - 0.3            |
| 51 - 64        | 0.1        | 0.8             | 0.3        | -0.1 - 0.5           |
| ≥65            | 0.2        | 0.9             | 0.0        | -0.4 - 0.5           |
| <b>Overall</b> | <b>0.2</b> | <b>0.8</b>      | <b>0.0</b> | <b>-0.1 - 0.4</b>    |

<sup>1</sup> ER visits are for the Winnipeg Regional Health Authority only; <sup>2</sup> The periods for which encounters were averaged (as number per year) was 180 days before to 730 days after diagnosis for invasive cancer; <sup>3</sup> Standard deviation; <sup>4</sup> Q1 and Q3 are the first and third quartile respectively

Supplementary Table 92 **Distribution of excess number of prescriptions<sup>1</sup> (per year) due to invasive cancer of the penis (for patients compared to their matches) among Manitoba males by age group (1997-2015).**

| Age (years)    | Average    | SD <sup>2</sup> | Median     | Q1 - Q3 <sup>3</sup> |
|----------------|------------|-----------------|------------|----------------------|
| 18 - 30        | 14.7       | 12.2            | 16.9       | 1.6 - 25.6           |
| 31 - 50        | 8.4        | 21.2            | 3.9        | -2.8 - 17.6          |
| 51 - 64        | 10.6       | 41.3            | -2.7       | -11.2 - 28.0         |
| ≥65            | 4.1        | 57.8            | 1.3        | -26.1 - 31.9         |
| <b>Overall</b> | <b>6.3</b> | <b>50.6</b>     | <b>1.2</b> | <b>-15.1 - 28.0</b>  |

<sup>1</sup> The periods for which encounters were averaged (as number per year) was 180 days before to 730 days after diagnosis for invasive cancer; <sup>2</sup> Standard deviation; <sup>3</sup> Q1 and Q3 are the first and third quartile respectively



**Excess healthcare utilization by regional health authority and Winnipeg region of residence**

Supplementary Table 93 **Distribution of excess number of clinician visits<sup>1</sup> (per year) due to anogenital warts (for patients compared to their matches) among Manitoba males by regional health authority and Winnipeg region of residence (1997-2015).**

| <b>Region</b>              | <b>Average</b> | <b>SD<sup>2</sup></b> | <b>Median</b> | <b>Q1 - Q3<sup>3</sup></b> |
|----------------------------|----------------|-----------------------|---------------|----------------------------|
| Winnipeg                   | 4.7            | 10.2                  | 3.0           | -0.3 - 8.0                 |
| Northern suburbs           | 4.6            | 10.7                  | 3.0           | -0.3 - 7.7                 |
| Inner city                 | 5.2            | 11.0                  | 3.0           | -0.3 - 9.0                 |
| Southern suburbs           | 4.6            | 9.6                   | 3.0           | -0.3 - 8.0                 |
| Interlake-Eastern          | 4.2            | 9.9                   | 2.7           | 0.0 - 7.0                  |
| Northern                   | 4.0            | 9.1                   | 2.3           | 0.0 - 6.0                  |
| Southern                   | 4.0            | 7.0                   | 3.0           | 0.0 - 7.0                  |
| Prairie Mountain           | 4.4            | 7.7                   | 3.0           | 0.0 - 7.3                  |
| Public Trustee/In CFS care | 5.4            | 12.6                  | 3.2           | -1.7 - 8.0                 |
| <b>Overall</b>             | <b>4.6</b>     | <b>9.7</b>            | <b>3.0</b>    | <b>-0.3 - 7.7</b>          |

<sup>1</sup> The period for which encounters were averaged (as number per year) was 0 to 365 days after diagnosis for AGW; <sup>2</sup> Standard deviation; <sup>3</sup> Q1 and Q3 are the first and third quartile respectively

Supplementary Table 94 **Distribution of excess number of hospital admissions<sup>1</sup> (per year) due to anogenital warts (for patients compared to their matches) among Manitoba males by regional health authority and Winnipeg region of residence (1997-2015).**

| <b>Region</b>              | <b>Average</b> | <b>SD<sup>2</sup></b> | <b>Median</b> | <b>Q1 - Q3<sup>3</sup></b> |
|----------------------------|----------------|-----------------------|---------------|----------------------------|
| Winnipeg                   | 0.1            | 0.7                   | 0.0           | 0.0 - 0.0                  |
| Northern suburbs           | 0.2            | 0.6                   | 0.0           | 0.0 - 0.0                  |
| Inner city                 | 0.2            | 1.0                   | 0.0           | 0.0 - 0.0                  |
| Southern suburbs           | 0.1            | 0.5                   | 0.0           | 0.0 - 0.0                  |
| Interlake-Eastern          | 0.2            | 0.8                   | 0.0           | 0.0 - 0.0                  |
| Northern                   | 0.4            | 1.0                   | 0.0           | 0.0 - 1.0                  |
| Southern                   | 0.1            | 0.6                   | 0.0           | 0.0 - 0.0                  |
| Prairie Mountain           | 0.1            | 0.6                   | 0.0           | 0.0 - 0.0                  |
| Public Trustee/In CFS care | 0.5            | 1.0                   | 0.0           | 0.0 - 1.0                  |
| <b>Overall</b>             | <b>0.2</b>     | <b>0.7</b>            | <b>0.0</b>    | <b>0.0 - 0.0</b>           |

<sup>1</sup> The period for which encounters were averaged (as number per year) was 0 to 365 days after diagnosis for AGW; <sup>2</sup> Standard deviation; <sup>3</sup> Q1 and Q3 are the first and third quartile respectively

Supplementary Table 95 **Distribution of excess number of ER visits<sup>1,2</sup> (per year) due to anogenital warts (for patients compared to their matches) among Manitoba males by regional health authority and Winnipeg region of residence (1997-2015).**

| <b>Region</b>    | <b>Average</b> | <b>SD<sup>3</sup></b> | <b>Median</b> | <b>Q1 - Q3<sup>4</sup></b> |
|------------------|----------------|-----------------------|---------------|----------------------------|
| Winnipeg         | 0.1            | 1.2                   | 0.0           | -0.3 - 0.0                 |
| Northern suburbs | 0.2            | 1.0                   | 0.0           | -0.3 - 0.0                 |
| Inner city       | 0.1            | 2.2                   | 0.0           | -0.3 - 0.0                 |
| Southern suburbs | 0.1            | 0.8                   | 0.0           | 0.0 - 0.0                  |
| <b>Overall</b>   | <b>0.1</b>     | <b>1.2</b>            | <b>0.0</b>    | <b>-0.3 - 0.0</b>          |

<sup>1</sup> ER visits are for the Winnipeg Regional Health Authority only; <sup>2</sup> The period for which encounters were averaged (as number per year) was 0 to 365 days after diagnosis for AGW; <sup>3</sup> Standard deviation; <sup>4</sup> Q1 and Q3 are the first and third quartile respectively

Supplementary Table 96 **Distribution of excess number of prescriptions<sup>1</sup> (per year) due to anogenital warts (for patients compared to their matches) among Manitoba males by regional health authority and Winnipeg region of residence (1997-2015).**

| <b>Region</b>              | <b>Average</b> | <b>SD<sup>2</sup></b> | <b>Median</b> | <b>Q1 - Q3<sup>3</sup></b> |
|----------------------------|----------------|-----------------------|---------------|----------------------------|
| Winnipeg                   | 2.3            | 27.0                  | 0.0           | -2.3 - 4.0                 |
| Northern suburbs           | 2.9            | 28.0                  | 0.0           | -2.0 - 4.0                 |
| Inner city                 | 3.6            | 35.9                  | 0.0           | -3.7 - 5.0                 |
| Southern suburbs           | 1.6            | 22.2                  | 0.0           | -2.3 - 4.0                 |
| Interlake-Eastern          | 2.7            | 19.9                  | 0.3           | -2.3 - 4.0                 |
| Northern                   | 4.4            | 17.4                  | 0.7           | -1.7 - 5.7                 |
| Southern                   | 2.3            | 14.6                  | 0.3           | -1.7 - 4.0                 |
| Prairie Mountain           | 2.4            | 30.1                  | 0.0           | -2.3 - 4.0                 |
| Public Trustee/In CFS care | 3.1            | 48.2                  | -0.6          | -9.0 - 6.7                 |
| <b>Overall</b>             | <b>2.4</b>     | <b>25.9</b>           | <b>0.0</b>    | <b>-2.3 - 4.0</b>          |

<sup>1</sup> The period for which encounters were averaged (as number per year) was 0 to 365 days after diagnosis for AGW; <sup>2</sup> Standard deviation; <sup>3</sup> Q1 and Q3 are the first and third quartile respectively

Supplementary Table 97 **Distribution of excess number of clinician visits<sup>1</sup> (per year) due to HPV-related carcinoma *in situ* (for patients compared to their matches) among Manitoba males by regional health authority and Winnipeg region of residence (1997-2015).**

| <b>Region</b>              | <b>Average</b> | <b>SD<sup>2</sup></b> | <b>Median</b> | <b>Q1 - Q3<sup>3</sup></b> |
|----------------------------|----------------|-----------------------|---------------|----------------------------|
| Winnipeg                   | 9.0            | 11.6                  | 5.7           | 1.0 - 16.0                 |
| Northern suburbs           | 11.2           | 12.5                  | 11.0          | 1.7 - 17.7                 |
| Inner city                 | 13.6           | 15.5                  | 9.3           | 2.5 - 25.0                 |
| Southern suburbs           | 5.9            | 8.4                   | 4.0           | 0.7 - 12.0                 |
| Interlake-Eastern          | 8.7            | 8.7                   | 8.0           | 2.8 - 16.7                 |
| Northern                   | 8.8            | 11.2                  | 6.3           | 2.0 - 9.7                  |
| Southern                   | -0.1           | 6.0                   | 3.0           | -7.0 - 3.7                 |
| Prairie Mountain           | 5.4            | 10.9                  | 3.5           | -1.8 - 12.7                |
| Public Trustee/In CFS care | 21.0           |                       | 21.0          | 21.0 - 21.0                |
| <b>Overall</b>             | <b>8.6</b>     | <b>11.1</b>           | <b>4.8</b>    | <b>1.2 - 15.8</b>          |

<sup>1</sup> The period for which encounters were averaged (as number per year) was 0 to 365 days after diagnosis for carcinoma *in situ*; <sup>2</sup> Standard deviation; <sup>3</sup> Q1 and Q3 are the first and third quartile respectively

Supplementary Table 98 **Distribution of excess number of hospital admissions<sup>1</sup> (per year) due to HPV-related carcinoma *in situ* (for patients compared to their matches) among Manitoba males by regional health authority and Winnipeg region of residence (1997-2015).**

| <b>Region</b>              | <b>Average</b> | <b>SD<sup>2</sup></b> | <b>Median</b> | <b>Q1 - Q3<sup>3</sup></b> |
|----------------------------|----------------|-----------------------|---------------|----------------------------|
| Winnipeg                   | 0.8            | 1.0                   | 1.0           | 0.0 - 1.3                  |
| Northern suburbs           | 0.9            | 0.7                   | 1.0           | 0.0 - 1.3                  |
| Inner city                 | 0.5            | 1.0                   | 0.5           | -0.2 - 1.0                 |
| Southern suburbs           | 0.9            | 1.1                   | 1.0           | 0.0 - 1.7                  |
| Interlake-Eastern          | 0.7            | 1.3                   | 0.3           | -0.3 - 1.7                 |
| Northern                   | 0.8            | 0.9                   | 0.7           | 0.0 - 1.7                  |
| Southern                   | 0.3            | 1.2                   | 1.0           | -1.0 - 1.0                 |
| Prairie Mountain           | 0.5            | 1.9                   | 1.0           | -1.0 - 2.0                 |
| Public Trustee/In CFS care | 0.0            |                       | 0.0           | 0.0 - 0.0                  |
| <b>Overall</b>             | <b>0.8</b>     | <b>1.0</b>            | <b>0.7</b>    | <b>0.0 - 1.3</b>           |

<sup>1</sup> The period for which encounters were averaged (as number per year) was 0 to 365 days after diagnosis for carcinoma *in situ*; <sup>2</sup> Standard deviation; <sup>3</sup> Q1 and Q3 are the first and third quartile respectively

Supplementary Table 99 **Distribution of excess number of ER visits<sup>1,2</sup> (per year) due to HPV-related carcinoma *in situ* (for patients compared to their matches) among Manitoba males by regional health authority and Winnipeg region of residence (1997-2015).**

| <b>Region</b>    | <b>Average</b> | <b>SD<sup>3</sup></b> | <b>Median</b> | <b>Q1 - Q3<sup>4</sup></b> |
|------------------|----------------|-----------------------|---------------|----------------------------|
| Winnipeg         | -0.0           | 1.3                   | 0.0           | -0.3 - 0.0                 |
| Northern suburbs | 0.3            | 1.4                   | 0.0           | -0.3 - 0.0                 |
| Inner city       | -0.4           | 2.1                   | 0.0           | -1.3 - 0.5                 |
| Southern suburbs | -0.1           | 0.8                   | 0.0           | -0.3 - 0.0                 |
| <b>Overall</b>   | <b>-0.0</b>    | <b>1.3</b>            | <b>0.0</b>    | <b>-0.3 - 0.0</b>          |

<sup>1</sup> ER visits are for the Winnipeg Regional Health Authority only; <sup>2</sup> The period for which encounters were averaged (as number per year) was 0 to 365 days after diagnosis for carcinoma *in situ*; <sup>3</sup> Standard deviation; <sup>4</sup> Q1 and Q3 are the first and third quartile respectively

Supplementary Table 100 **Distribution of excess number of prescriptions<sup>1</sup> (per year) due to HPV-related carcinoma *in situ* (for patients compared to their matches) among Manitoba males by regional health authority and Winnipeg region of residence (1997-2015).**

| <b>Region</b>              | <b>Average</b> | <b>SD<sup>2</sup></b> | <b>Median</b> | <b>Q1 - Q3<sup>3</sup></b> |
|----------------------------|----------------|-----------------------|---------------|----------------------------|
| Winnipeg                   | 10.5           | 52.4                  | 1.2           | -10.7 - 16.7               |
| Northern suburbs           | 5.0            | 19.9                  | 0.7           | -1.7 - 10.7                |
| Inner city                 | 37.5           | 103.0                 | 44.5          | -23.8 - 130.0              |
| Southern suburbs           | 2.6            | 28.2                  | 1.0           | -10.7 - 6.7                |
| Interlake-Eastern          | 12.6           | 66.7                  | 3.2           | -23.5 - 22.7               |
| Northern                   | 9.1            | 29.9                  | 1.0           | -5.7 - 7.3                 |
| Southern                   | -7.1           | 17.6                  | -13.0         | -21.0 - 12.7               |
| Prairie Mountain           | 6.0            | 11.2                  | 5.0           | -1.2 - 13.2                |
| Public Trustee/In CFS care | -0.7           |                       | -0.7          | -0.7 - -0.7                |
| <b>Overall</b>             | <b>9.6</b>     | <b>49.6</b>           | <b>1.8</b>    | <b>-10.0 - 14.2</b>        |

<sup>1</sup> The period for which encounters were averaged (as number per year) was 0 to 365 days after diagnosis for carcinoma *in situ*; <sup>2</sup> Standard deviation; <sup>3</sup> Q1 and Q3 are the first and third quartile respectively

Supplementary Table 101 **Distribution of excess number of clinician visits<sup>1</sup> (per year) due to HPV-related invasive cancer (for patients compared to their matches) among Manitoba males by regional health authority and Winnipeg region of residence (1997-2015).**

| <b>Region</b>              | <b>Average</b> | <b>SD<sup>2</sup></b> | <b>Median</b> | <b>Q1 - Q3<sup>3</sup></b> |
|----------------------------|----------------|-----------------------|---------------|----------------------------|
| Winnipeg                   | 9.9            | 16.4                  | 8.7           | 2.5 - 16.9                 |
| Northern suburbs           | 8.5            | 11.7                  | 7.7           | 2.7 - 14.5                 |
| Inner city                 | 12.4           | 24.1                  | 9.5           | 3.1 - 21.0                 |
| Southern suburbs           | 9.6            | 14.5                  | 8.5           | 2.2 - 16.8                 |
| Interlake-Eastern          | 9.9            | 10.4                  | 8.5           | 2.7 - 15.6                 |
| Northern                   | 10.5           | 16.9                  | 7.6           | 0.1 - 14.6                 |
| Southern                   | 11.9           | 14.8                  | 10.4          | 6.0 - 18.2                 |
| Prairie Mountain           | 10.5           | 14.6                  | 8.4           | 3.3 - 16.3                 |
| Public Trustee/In CFS care | 8.9            | 15.7                  | 9.0           | 6.4 - 11.5                 |
| <b>Overall</b>             | <b>10.2</b>    | <b>15.4</b>           | <b>8.8</b>    | <b>3.0 - 16.7</b>          |

<sup>1</sup> The periods for which encounters were averaged (as number per year) was 180 days before to 730 days after diagnosis for invasive cancer; <sup>2</sup> Standard deviation; <sup>3</sup> Q1 and Q3 are the first and third quartile respectively

Supplementary Table 102 **Distribution of excess number of hospital admissions<sup>1</sup> (per year) due to HPV-related invasive cancer (for patients compared to their matches) among Manitoba males by regional health authority and Winnipeg region of residence (1997-2015).**

| <b>Region</b>              | <b>Average</b> | <b>SD<sup>2</sup></b> | <b>Median</b> | <b>Q1 - Q3<sup>3</sup></b> |
|----------------------------|----------------|-----------------------|---------------|----------------------------|
| Winnipeg                   | 1.0            | 1.3                   | 0.8           | 0.3 - 1.6                  |
| Northern suburbs           | 1.0            | 1.5                   | 0.7           | 0.3 - 1.5                  |
| Inner city                 | 1.3            | 1.4                   | 0.9           | 0.5 - 1.9                  |
| Southern suburbs           | 0.9            | 1.0                   | 0.7           | 0.3 - 1.3                  |
| Interlake-Eastern          | 1.0            | 1.1                   | 0.7           | 0.3 - 1.6                  |
| Northern                   | 1.2            | 1.2                   | 0.8           | 0.4 - 1.6                  |
| Southern                   | 1.1            | 1.1                   | 0.8           | 0.4 - 1.6                  |
| Prairie Mountain           | 1.1            | 1.0                   | 0.8           | 0.4 - 1.6                  |
| Public Trustee/In CFS care | 0.2            | 0.6                   | 0.3           | -0.4 - 0.6                 |
| <b>Overall</b>             | <b>1.0</b>     | <b>1.2</b>            | <b>0.8</b>    | <b>0.4 - 1.6</b>           |

<sup>1</sup> The periods for which encounters were averaged (as number per year) was 180 days before to 730 days after diagnosis for invasive cancer; <sup>2</sup> Standard deviation; <sup>3</sup> Q1 and Q3 are the first and third quartile respectively

Supplementary Table 103 **Distribution of excess number of ER visits<sup>1,2</sup> (per year) due to HPV-related invasive cancer (for patients compared to their matches) among Manitoba males by regional health authority and Winnipeg region of residence (1997-2015).**

| <b>Region</b>    | <b>Average</b> | <b>SD<sup>3</sup></b> | <b>Median</b> | <b>Q1 - Q3<sup>4</sup></b> |
|------------------|----------------|-----------------------|---------------|----------------------------|
| Winnipeg         | 0.5            | 2.1                   | 0.0           | -0.1 - 0.5                 |
| Northern suburbs | 0.3            | 1.1                   | 0.0           | -0.1 - 0.5                 |
| Inner city       | 1.0            | 4.2                   | 0.0           | -0.1 - 0.8                 |
| Southern suburbs | 0.3            | 1.1                   | 0.0           | -0.1 - 0.6                 |
| <b>Overall</b>   | <b>0.5</b>     | <b>2.1</b>            | <b>0.0</b>    | <b>-0.1 - 0.5</b>          |

<sup>1</sup> ER visits are for the Winnipeg Regional Health Authority only; <sup>2</sup> The periods for which encounters were averaged (as number per year) was 180 days before to 730 days after diagnosis for invasive cancer; <sup>3</sup> Standard deviation; <sup>4</sup> Q1 and Q3 are the first and third quartile respectively

Supplementary Table 104 **Distribution of excess number of prescriptions<sup>1</sup> (per year) due to HPV-related invasive cancer (for patients compared to their matches) among Manitoba males by regional health authority and Winnipeg region of residence (1997-2015).**

| <b>Region</b>              | <b>Average</b> | <b>SD<sup>2</sup></b> | <b>Median</b> | <b>Q1 - Q3<sup>3</sup></b> |
|----------------------------|----------------|-----------------------|---------------|----------------------------|
| Winnipeg                   | 11.2           | 88.9                  | 5.1           | -7.9 - 22.3                |
| Northern suburbs           | -3.5           | 74.2                  | 4.1           | -9.7 - 18.2                |
| Inner city                 | 36.5           | 161.7                 | 9.1           | -11.4 - 42.7               |
| Southern suburbs           | 8.8            | 40.3                  | 4.3           | -5.3 - 19.5                |
| Interlake-Eastern          | 8.5            | 33.9                  | 3.9           | -8.9 - 21.9                |
| Northern                   | 5.4            | 38.4                  | 1.6           | -9.3 - 25.4                |
| Southern                   | 14.6           | 40.2                  | 10.9          | -3.3 - 24.3                |
| Prairie Mountain           | 18.0           | 148.7                 | 6.7           | -15.2 - 29.6               |
| Public Trustee/In CFS care | 48.3           | 66.2                  | 52.5          | 17.7 - 69.2                |
| <b>Overall</b>             | <b>12.2</b>    | <b>91.5</b>           | <b>6.0</b>    | <b>-7.9 - 24.6</b>         |

<sup>1</sup> The periods for which encounters were averaged (as number per year) was 180 days before to 730 days after diagnosis for invasive cancer; <sup>2</sup> Standard deviation; <sup>3</sup> Q1 and Q3 are the first and third quartile respectively

Supplementary Table 105 **Distribution of excess number of clinician visits<sup>1</sup> (per year) due to invasive cancer of the anus (for patients compared to their matches) among Manitoba males by regional health authority and Winnipeg region of residence (1997-2015).**

| <b>Region</b>     | <b>Average</b> | <b>SD<sup>2</sup></b> | <b>Median</b> | <b>Q1 - Q3<sup>3</sup></b> |
|-------------------|----------------|-----------------------|---------------|----------------------------|
| Winnipeg          | 14.7           | 22.6                  | 10.9          | 5.5 - 19.1                 |
| Northern suburbs  | 13.3           | 14.6                  | 10.9          | 10.3 - 16.7                |
| Inner city        | 26.5           | 24.7                  | 17.5          | 9.3 - 32.5                 |
| Southern suburbs  | 7.9            | 22.2                  | 9.7           | 4.8 - 17.2                 |
| Interlake-Eastern | 23.0           | 15.8                  | 17.7          | 8.5 - 31.2                 |
| Northern          | 8.5            | 12.3                  | 8.5           | -0.2 - 17.2                |
| Southern          | 21.8           | 5.9                   | 21.7          | 16.0 - 27.7                |
| Prairie Mountain  | 21.0           | 14.7                  | 15.7          | 12.7 - 28.4                |
| <b>Overall</b>    | <b>16.2</b>    | <b>20.6</b>           | <b>14.4</b>   | <b>6.9 - 23.6</b>          |

<sup>1</sup> The periods for which encounters were averaged (as number per year) was 180 days before to 730 days after diagnosis for invasive cancer; <sup>2</sup> Standard deviation; <sup>3</sup> Q1 and Q3 are the first and third quartile respectively

Supplementary Table 106 **Distribution of excess number of hospital admissions<sup>1</sup> (per year) due to invasive cancer of the anus (for patients compared to their matches) among Manitoba males by regional health authority and Winnipeg region of residence (1997-2015).**

| <b>Region</b>     | <b>Average</b> | <b>SD<sup>2</sup></b> | <b>Median</b> | <b>Q1 - Q3<sup>3</sup></b> |
|-------------------|----------------|-----------------------|---------------|----------------------------|
| Winnipeg          | 1.8            | 1.7                   | 1.3           | 0.7 - 2.4                  |
| Northern suburbs  | 1.3            | 1.0                   | 0.9           | 0.4 - 2.1                  |
| Inner city        | 2.8            | 2.4                   | 2.0           | 1.1 - 3.2                  |
| Southern suburbs  | 1.4            | 1.0                   | 1.3           | 0.7 - 2.4                  |
| Interlake-Eastern | 1.6            | 1.3                   | 1.6           | 0.7 - 2.4                  |
| Northern          | 1.0            | 0.0                   | 1.0           | 1.0 - 1.1                  |
| Southern          | 2.5            | 1.8                   | 2.9           | 0.5 - 4.1                  |
| Prairie Mountain  | 1.6            | 1.1                   | 2.0           | 0.8 - 2.4                  |
| <b>Overall</b>    | <b>1.8</b>     | <b>1.6</b>            | <b>1.4</b>    | <b>0.7 - 2.4</b>           |

<sup>1</sup> The periods for which encounters were averaged (as number per year) was 180 days before to 730 days after diagnosis for invasive cancer; <sup>2</sup> Standard deviation; <sup>3</sup> Q1 and Q3 are the first and third quartile respectively

Supplementary Table 107 **Distribution of excess number of ER visits<sup>1,2</sup> (per year) due to invasive cancer of the anus (for patients compared to their matches) among Manitoba males by regional health authority and Winnipeg region of residence (1997-2015).**

| <b>Region</b>    | <b>Average</b> | <b>SD<sup>3</sup></b> | <b>Median</b> | <b>Q1 - Q3<sup>4</sup></b> |
|------------------|----------------|-----------------------|---------------|----------------------------|
| Winnipeg         | 2.2            | 6.2                   | 0.4           | 0.0 - 1.5                  |
| Northern suburbs | 0.5            | 0.6                   | 0.4           | 0.0 - 1.2                  |
| Inner city       | 5.8            | 10.6                  | 1.2           | 0.1 - 9.1                  |
| Southern suburbs | 0.7            | 1.0                   | 0.3           | 0.0 - 1.6                  |
| <b>Overall</b>   | <b>2.2</b>     | <b>6.2</b>            | <b>0.4</b>    | <b>0.0 - 1.5</b>           |

<sup>1</sup> ER visits are for the Winnipeg Regional Health Authority only; <sup>2</sup> The periods for which encounters were averaged (as number per year) was 180 days before to 730 days after diagnosis for invasive cancer; <sup>3</sup> Standard deviation; <sup>4</sup> Q1 and Q3 are the first and third quartile respectively

Supplementary Table 108 **Distribution of excess number of prescriptions<sup>1</sup> (per year) due to invasive cancer of the anus (for patients compared to their matches) among Manitoba males by regional health authority and Winnipeg region of residence (1997-2015).**

| <b>Region</b>     | <b>Average</b> | <b>SD<sup>2</sup></b> | <b>Median</b> | <b>Q1 - Q3<sup>3</sup></b> |
|-------------------|----------------|-----------------------|---------------|----------------------------|
| Winnipeg          | 74.0           | 258.2                 | 8.8           | -1.6 - 65.5                |
| Northern suburbs  | 25.4           | 112.3                 | 6.0           | -13.7 - 9.6                |
| Inner city        | 173.3          | 451.3                 | 39.0          | 9.2 - 115.6                |
| Southern suburbs  | 35.0           | 67.2                  | 5.1           | -2.4 - 37.9                |
| Interlake-Eastern | 32.1           | 67.2                  | 7.5           | -10.9 - 47.6               |
| Northern          | 11.4           | 21.8                  | 11.4          | -4.0 - 26.8                |
| Southern          | 34.2           | 23.1                  | 33.2          | 11.6 - 57.7                |
| Prairie Mountain  | 256.4          | 545.5                 | 21.6          | 7.1 - 27.2                 |
| <b>Overall</b>    | <b>79.8</b>    | <b>266.5</b>          | <b>9.2</b>    | <b>-1.5 - 46.8</b>         |

<sup>1</sup> The periods for which encounters were averaged (as number per year) was 180 days before to 730 days after diagnosis for invasive cancer; <sup>2</sup> Standard deviation; <sup>3</sup> Q1 and Q3 are the first and third quartile respectively



Supplementary Table 109 **Distribution of excess number of clinician visits<sup>1</sup> (per year) due to invasive cancer of the oral cavity (for patients compared to their matches) among Manitoba males by regional health authority and Winnipeg region of residence (1997-2015).**

| <b>Region</b>              | <b>Average</b> | <b>SD<sup>2</sup></b> | <b>Median</b> | <b>Q1 - Q3<sup>3</sup></b> |
|----------------------------|----------------|-----------------------|---------------|----------------------------|
| Winnipeg                   | 10.2           | 17.7                  | 7.9           | 1.7 - 16.3                 |
| Northern suburbs           | 7.9            | 13.0                  | 6.1           | 0.7 - 13.3                 |
| Inner city                 | 10.5           | 29.1                  | 6.1           | 0.9 - 15.5                 |
| Southern suburbs           | 11.2           | 13.5                  | 8.9           | 2.2 - 18.4                 |
| Interlake-Eastern          | 7.0            | 9.3                   | 6.8           | 0.1 - 12.5                 |
| Northern                   | 7.0            | 13.4                  | 5.7           | 0.1 - 10.8                 |
| Southern                   | 12.0           | 9.0                   | 10.5          | 6.0 - 17.3                 |
| Prairie Mountain           | 12.4           | 17.6                  | 10.2          | 2.5 - 16.3                 |
| Public Trustee/In CFS care | 3.8            | 12.5                  | 9.0           | 6.4 - 10.6                 |
| <b>Overall</b>             | <b>10.1</b>    | <b>16.2</b>           | <b>8.1</b>    | <b>2.1 - 15.5</b>          |

<sup>1</sup> The periods for which encounters were averaged (as number per year) was 180 days before to 730 days after diagnosis for invasive cancer; <sup>2</sup> Standard deviation; <sup>3</sup> Q1 and Q3 are the first and third quartile respectively

Supplementary Table 110 **Distribution of excess number of hospital admissions<sup>1</sup> (per year) due to invasive cancer of the oral cavity (for patients compared to their matches) among Manitoba males by regional health authority and Winnipeg region of residence (1997-2015).**

| <b>Region</b>              | <b>Average</b> | <b>SD<sup>2</sup></b> | <b>Median</b> | <b>Q1 - Q3<sup>3</sup></b> |
|----------------------------|----------------|-----------------------|---------------|----------------------------|
| Winnipeg                   | 1.0            | 1.2                   | 0.8           | 0.3 - 1.4                  |
| Northern suburbs           | 1.0            | 1.8                   | 0.5           | 0.3 - 1.3                  |
| Inner city                 | 1.1            | 0.8                   | 0.9           | 0.7 - 1.6                  |
| Southern suburbs           | 0.9            | 1.1                   | 0.7           | 0.3 - 1.4                  |
| Interlake-Eastern          | 1.0            | 0.9                   | 0.8           | 0.4 - 1.6                  |
| Northern                   | 1.1            | 0.8                   | 1.2           | 0.4 - 1.7                  |
| Southern                   | 1.1            | 0.8                   | 1.0           | 0.5 - 1.9                  |
| Prairie Mountain           | 1.1            | 1.0                   | 0.8           | 0.4 - 2.0                  |
| Public Trustee/In CFS care | 0.2            | 0.7                   | 0.3           | -0.4 - 0.6                 |
| <b>Overall</b>             | <b>1.0</b>     | <b>1.1</b>            | <b>0.8</b>    | <b>0.4 - 1.6</b>           |

<sup>1</sup> The periods for which encounters were averaged (as number per year) was 180 days before to 730 days after diagnosis for invasive cancer; <sup>2</sup> Standard deviation; <sup>3</sup> Q1 and Q3 are the first and third quartile respectively

Supplementary Table 111 **Distribution of excess number of ER visits<sup>1,2</sup> (per year) due to invasive cancer of the oral cavity (for patients compared to their matches) among Manitoba males by regional health authority and Winnipeg region of residence (1997-2015).**

| <b>Region</b>    | <b>Average</b> | <b>SD<sup>3</sup></b> | <b>Median</b> | <b>Q1 - Q3<sup>4</sup></b> |
|------------------|----------------|-----------------------|---------------|----------------------------|
| Winnipeg         | 0.3            | 1.4                   | 0.0           | -0.1 - 0.5                 |
| Northern suburbs | 0.2            | 0.9                   | 0.0           | -0.1 - 0.4                 |
| Inner city       | 0.6            | 2.4                   | 0.0           | -0.1 - 0.8                 |
| Southern suburbs | 0.3            | 1.1                   | 0.0           | -0.1 - 0.7                 |
| <b>Overall</b>   | <b>0.3</b>     | <b>1.4</b>            | <b>0.0</b>    | <b>-0.1 - 0.5</b>          |

<sup>1</sup> ER visits are for the Winnipeg Regional Health Authority only; <sup>2</sup> The periods for which encounters were averaged (as number per year) was 180 days before to 730 days after diagnosis for invasive cancer; <sup>3</sup> Standard deviation; <sup>4</sup> Q1 and Q3 are the first and third quartile respectively

Supplementary Table 112 **Distribution of excess number of prescriptions<sup>1</sup> (per year) due to invasive cancer of the oral cavity (for patients compared to their matches) among Manitoba males by regional health authority and Winnipeg region of residence (1997-2015).**

| <b>Region</b>              | <b>Average</b> | <b>SD<sup>2</sup></b> | <b>Median</b> | <b>Q1 - Q3<sup>3</sup></b> |
|----------------------------|----------------|-----------------------|---------------|----------------------------|
| Winnipeg                   | 8.7            | 60.0                  | 9.6           | -8.0 - 25.6                |
| Northern suburbs           | -7.4           | 79.8                  | 5.9           | -10.4 - 20.0               |
| Inner city                 | 21.7           | 62.2                  | 11.5          | -26.4 - 64.9               |
| Southern suburbs           | 11.5           | 45.1                  | 10.1          | -2.9 - 24.6                |
| Interlake-Eastern          | 1.3            | 29.0                  | -0.5          | -14.3 - 6.8                |
| Northern                   | -3.0           | 40.8                  | 0.5           | -8.9 - 12.2                |
| Southern                   | 10.5           | 23.8                  | 9.9           | -4.0 - 23.2                |
| Prairie Mountain           | 41.0           | 127.6                 | 7.2           | -2.5 - 40.3                |
| Public Trustee/In CFS care | 42.1           | 80.0                  | 45.1          | 17.7 - 52.5                |
| <b>Overall</b>             | <b>11.9</b>    | <b>67.3</b>           | <b>6.8</b>    | <b>-7.9 - 25.0</b>         |

<sup>1</sup> The periods for which encounters were averaged (as number per year) was 180 days before to 730 days after diagnosis for invasive cancer; <sup>2</sup> Standard deviation; <sup>3</sup> Q1 and Q3 are the first and third quartile respectively

Supplementary Table 113 **Distribution of excess number of clinician visits<sup>1</sup> (per year) due to invasive cancer of the oropharynx (for patients compared to their matches) among Manitoba males by regional health authority and Winnipeg region of residence (1997-2015).**

| <b>Region</b>     | <b>Average</b> | <b>SD<sup>2</sup></b> | <b>Median</b> | <b>Q1 - Q3<sup>3</sup></b> |
|-------------------|----------------|-----------------------|---------------|----------------------------|
| Winnipeg          | 9.8            | 13.9                  | 10.0          | 3.5 - 17.6                 |
| Northern suburbs  | 9.0            | 10.5                  | 9.6           | 4.7 - 16.0                 |
| Inner city        | 12.7           | 19.9                  | 16.1          | 5.3 - 26.8                 |
| Southern suburbs  | 9.2            | 13.1                  | 8.5           | 2.5 - 15.7                 |
| Interlake-Eastern | 10.4           | 8.8                   | 9.3           | 3.1 - 16.6                 |
| Northern          | 14.6           | 20.1                  | 10.0          | 5.2 - 15.7                 |
| Southern          | 9.7            | 19.6                  | 9.0           | 5.4 - 15.9                 |
| Prairie Mountain  | 11.5           | 9.7                   | 9.2           | 5.7 - 17.7                 |
| <b>Overall</b>    | <b>10.2</b>    | <b>13.8</b>           | <b>9.3</b>    | <b>3.7 - 17.5</b>          |

<sup>1</sup> The periods for which encounters were averaged (as number per year) was 180 days before to 730 days after diagnosis for invasive cancer; <sup>2</sup> Standard deviation; <sup>3</sup> Q1 and Q3 are the first and third quartile respectively

Supplementary Table 114 **Distribution of excess number of hospital admissions<sup>1</sup> (per year) due to invasive cancer of the oropharynx (for patients compared to their matches) among Manitoba males by regional health authority and Winnipeg region of residence (1997-2015).**

| <b>Region</b>     | <b>Average</b> | <b>SD<sup>2</sup></b> | <b>Median</b> | <b>Q1 - Q3<sup>3</sup></b> |
|-------------------|----------------|-----------------------|---------------|----------------------------|
| Winnipeg          | 0.9            | 1.2                   | 0.7           | 0.3 - 1.3                  |
| Northern suburbs  | 1.1            | 1.4                   | 0.5           | 0.3 - 1.5                  |
| Inner city        | 1.0            | 1.3                   | 0.9           | 0.4 - 1.9                  |
| Southern suburbs  | 0.8            | 1.0                   | 0.7           | 0.3 - 1.2                  |
| Interlake-Eastern | 0.8            | 1.3                   | 0.7           | 0.1 - 1.5                  |
| Northern          | 1.2            | 1.3                   | 0.8           | 0.3 - 1.2                  |
| Southern          | 0.7            | 1.0                   | 0.6           | 0.2 - 1.2                  |
| Prairie Mountain  | 1.2            | 1.0                   | 1.0           | 0.4 - 1.6                  |
| <b>Overall</b>    | <b>0.9</b>     | <b>1.2</b>            | <b>0.7</b>    | <b>0.3 - 1.4</b>           |

<sup>1</sup> The periods for which encounters were averaged (as number per year) was 180 days before to 730 days after diagnosis for invasive cancer; <sup>2</sup> Standard deviation; <sup>3</sup> Q1 and Q3 are the first and third quartile respectively

Supplementary Table 115 **Distribution of excess number of ER visits<sup>1,2</sup> (per year) due to invasive cancer of the oropharynx (for patients compared to their matches) among Manitoba males by regional health authority and Winnipeg region of residence (1997-2015).**

| <b>Region</b>    | <b>Average</b> | <b>SD<sup>3</sup></b> | <b>Median</b> | <b>Q1 - Q3<sup>4</sup></b> |
|------------------|----------------|-----------------------|---------------|----------------------------|
| Winnipeg         | 0.4            | 1.2                   | 0.0           | -0.1 - 0.4                 |
| Northern suburbs | 0.4            | 1.4                   | 0.0           | -0.1 - 0.5                 |
| Inner city       | 0.4            | 1.5                   | 0.0           | -0.1 - 0.4                 |
| Southern suburbs | 0.3            | 1.0                   | 0.0           | -0.1 - 0.5                 |
| <b>Overall</b>   | <b>0.4</b>     | <b>1.2</b>            | <b>0.0</b>    | <b>-0.1 - 0.4</b>          |

<sup>1</sup> ER visits are for the Winnipeg Regional Health Authority only; <sup>2</sup> The periods for which encounters were averaged (as number per year) was 180 days before to 730 days after diagnosis for invasive cancer; <sup>3</sup> Standard deviation; <sup>4</sup> Q1 and Q3 are the first and third quartile respectively

Supplementary Table 116 **Distribution of excess number of prescriptions<sup>1</sup> (per year) due to invasive cancer of the oropharynx (for patients compared to their matches) among Manitoba males by regional health authority and Winnipeg region of residence (1997-2015).**

| <b>Region</b>     | <b>Average</b> | <b>SD<sup>2</sup></b> | <b>Median</b> | <b>Q1 - Q3<sup>3</sup></b> |
|-------------------|----------------|-----------------------|---------------|----------------------------|
| Winnipeg          | 5.4            | 47.6                  | 4.1           | -6.7 - 17.6                |
| Northern suburbs  | -3.6           | 67.4                  | 3.5           | -8.4 - 21.3                |
| Inner city        | 23.2           | 57.5                  | 8.3           | -4.0 - 31.5                |
| Southern suburbs  | 4.2            | 23.8                  | 2.8           | -6.5 - 13.1                |
| Interlake-Eastern | 11.5           | 32.0                  | 12.5          | -6.7 - 25.9                |
| Northern          | 15.7           | 38.8                  | 10.1          | -9.3 - 34.9                |
| Southern          | 9.7            | 40.5                  | 5.3           | -3.7 - 19.6                |
| Prairie Mountain  | -17.2          | 116.0                 | 3.7           | -25.9 - 24.0               |
| <b>Overall</b>    | <b>4.1</b>     | <b>58.5</b>           | <b>4.9</b>    | <b>-7.1 - 20.9</b>         |

<sup>1</sup> The periods for which encounters were averaged (as number per year) was 180 days before to 730 days after diagnosis for invasive cancer; <sup>2</sup> Standard deviation; <sup>3</sup> Q1 and Q3 are the first and third quartile respectively

Supplementary Table 117 **Distribution of excess number of clinician visits<sup>1</sup> (per year) due to invasive cancer of the penis (for patients compared to their matches) among Manitoba males by regional health authority and Winnipeg region of residence (1997-2015).**

| <b>Region</b>              | <b>Average</b> | <b>SD<sup>2</sup></b> | <b>Median</b> | <b>Q1 - Q3<sup>3</sup></b> |
|----------------------------|----------------|-----------------------|---------------|----------------------------|
| Winnipeg                   | 4.9            | 14.4                  | 5.6           | -2.4 - 12.0                |
| Northern suburbs           | 5.0            | 9.4                   | 5.6           | 2.3 - 10.1                 |
| Inner city                 | 4.3            | 9.8                   | 5.5           | -2.4 - 8.7                 |
| Southern suburbs           | 5.1            | 19.3                  | 5.0           | -3.1 - 15.1                |
| Interlake-Eastern          | 9.6            | 11.7                  | 7.6           | 0.4 - 13.4                 |
| Northern                   | 5.0            | 12.7                  | 7.8           | -4.1 - 14.1                |
| Southern                   | 15.5           | 14.7                  | 13.6          | 4.4 - 32.2                 |
| Prairie Mountain           | 5.4            | 15.4                  | 6.5           | 1.3 - 12.9                 |
| Public Trustee/In CFS care | 21.7           | 19.6                  | 21.7          | 7.9 - 35.6                 |
| <b>Overall</b>             | <b>6.8</b>     | <b>14.7</b>           | <b>6.5</b>    | <b>0.7 - 12.9</b>          |

<sup>1</sup> The periods for which encounters were averaged (as number per year) was 180 days before to 730 days after diagnosis for invasive cancer; <sup>2</sup> Standard deviation; <sup>3</sup> Q1 and Q3 are the first and third quartile respectively

Supplementary Table 118 **Distribution of excess number of hospital admissions<sup>1</sup> (per year) due to invasive cancer of the penis (for patients compared to their matches) among Manitoba males by regional health authority and Winnipeg region of residence (1997-2015).**

| <b>Region</b>              | <b>Average</b> | <b>SD<sup>2</sup></b> | <b>Median</b> | <b>Q1 - Q3<sup>3</sup></b> |
|----------------------------|----------------|-----------------------|---------------|----------------------------|
| Winnipeg                   | 1.1            | 0.9                   | 0.8           | 0.4 - 1.6                  |
| Northern suburbs           | 1.1            | 0.9                   | 0.9           | 0.4 - 1.6                  |
| Inner city                 | 1.3            | 0.8                   | 1.2           | 0.8 - 1.7                  |
| Southern suburbs           | 1.0            | 1.1                   | 0.7           | 0.4 - 1.2                  |
| Interlake-Eastern          | 1.2            | 0.9                   | 0.9           | 0.6 - 1.5                  |
| Northern                   | 1.3            | 2.1                   | 0.5           | 0.1 - 2.5                  |
| Southern                   | 1.6            | 1.1                   | 1.6           | 0.7 - 2.0                  |
| Prairie Mountain           | 0.8            | 0.9                   | 0.7           | 0.3 - 1.5                  |
| Public Trustee/In CFS care | 0.3            | 0.0                   | 0.3           | 0.3 - 0.3                  |
| <b>Overall</b>             | <b>1.0</b>     | <b>1.0</b>            | <b>0.8</b>    | <b>0.4 - 1.6</b>           |

<sup>1</sup> The periods for which encounters were averaged (as number per year) was 180 days before to 730 days after diagnosis for invasive cancer; <sup>2</sup> Standard deviation; <sup>3</sup> Q1 and Q3 are the first and third quartile respectively

Supplementary Table 119 **Distribution of excess number of ER visits<sup>1,2</sup> (per year) due to invasive cancer of the penis (for patients compared to their matches) among Manitoba males by regional health authority and Winnipeg region of residence (1997-2015).**

| <b>Region</b>    | <b>Average</b> | <b>SD<sup>3</sup></b> | <b>Median</b> | <b>Q1 - Q3<sup>4</sup></b> |
|------------------|----------------|-----------------------|---------------|----------------------------|
| Winnipeg         | 0.2            | 0.8                   | 0.0           | -0.1 - 0.4                 |
| Northern suburbs | 0.3            | 0.7                   | 0.0           | 0.0 - 0.3                  |
| Inner city       | 0.0            | 0.8                   | 0.1           | -0.5 - 0.4                 |
| Southern suburbs | 0.2            | 0.9                   | 0.1           | -0.1 - 0.5                 |
| <b>Overall</b>   | <b>0.2</b>     | <b>0.8</b>            | <b>0.0</b>    | <b>-0.1 - 0.4</b>          |

<sup>1</sup> ER visits are for the Winnipeg Regional Health Authority only; <sup>2</sup> The periods for which encounters were averaged (as number per year) was 180 days before to 730 days after diagnosis for invasive cancer; <sup>3</sup> Standard deviation; <sup>4</sup> Q1 and Q3 are the first and third quartile respectively

Supplementary Table 120 **Distribution of excess number of prescriptions<sup>1</sup> (per year) due to invasive cancer of the penis (for patients compared to their matches) among Manitoba males by regional health authority and Winnipeg region of residence (1997-2015).**

| <b>Region</b>              | <b>Average</b> | <b>SD<sup>2</sup></b> | <b>Median</b> | <b>Q1 - Q3<sup>3</sup></b> |
|----------------------------|----------------|-----------------------|---------------|----------------------------|
| Winnipeg                   | -3.2           | 49.3                  | -2.6          | -14.1 - 16.1               |
| Northern suburbs           | -9.1           | 50.4                  | 1.6           | -15.1 - 8.9                |
| Inner city                 | -0.6           | 39.4                  | -2.6          | -12.8 - 4.2                |
| Southern suburbs           | -1.2           | 55.7                  | -4.5          | -26.1 - 17.6               |
| Interlake-Eastern          | 4.3            | 24.5                  | 0.2           | -10.1 - 19.2               |
| Northern                   | -16.5          | 27.8                  | -7.2          | -34.4 - 1.3                |
| Southern                   | 36.5           | 70.5                  | 22.3          | -3.0 - 46.7                |
| Prairie Mountain           | 10.1           | 50.7                  | 6.3           | -28.5 - 47.5               |
| Public Trustee/In CFS care | 64.0           | 7.4                   | 64.0          | 58.7 - 69.2                |
| <b>Overall</b>             | <b>6.3</b>     | <b>50.6</b>           | <b>1.2</b>    | <b>-15.1 - 28.0</b>        |

<sup>1</sup> The periods for which encounters were averaged (as number per year) was 180 days before to 730 days after diagnosis for invasive cancer; <sup>2</sup> Standard deviation; <sup>3</sup> Q1 and Q3 are the first and third quartile respectively

**Excess healthcare utilization by year of diagnosis**

Supplementary Table 121 **Distribution of excess number of clinician visits<sup>1</sup> (per year) due to anogenital warts (for patients compared to their matches) among Manitoba males by year of diagnosis (1997-2015).**

| <b>Year of diagnosis</b> | <b>Average</b> | <b>SD<sup>2</sup></b> | <b>Median</b> | <b>Q1 - Q3<sup>3</sup></b> |
|--------------------------|----------------|-----------------------|---------------|----------------------------|
| 1997                     | 4.8            | 9.1                   | 3.0           | -0.3 - 8.0                 |
| 1998                     | 3.9            | 9.5                   | 2.7           | -0.7 - 7.3                 |
| 1999                     | 3.7            | 8.7                   | 2.7           | -1.0 - 6.7                 |
| 2000                     | 4.4            | 8.6                   | 3.0           | 0.0 - 8.0                  |
| 2001                     | 4.6            | 11.0                  | 3.0           | -0.7 - 6.7                 |
| 2002                     | 3.7            | 9.0                   | 2.3           | -0.7 - 7.0                 |
| 2003                     | 4.2            | 9.0                   | 2.7           | -0.3 - 7.0                 |
| 2004                     | 4.6            | 9.0                   | 3.3           | 0.3 - 7.3                  |
| 2005                     | 4.0            | 9.4                   | 2.3           | -0.3 - 6.7                 |
| 2006                     | 4.0            | 8.1                   | 2.7           | -0.3 - 7.0                 |
| 2007                     | 5.3            | 10.3                  | 3.3           | 0.0 - 8.3                  |
| 2008                     | 4.7            | 8.9                   | 3.3           | 0.3 - 8.0                  |
| 2009                     | 4.5            | 10.7                  | 2.7           | -0.3 - 7.0                 |
| 2010                     | 4.7            | 8.7                   | 3.0           | -0.3 - 8.3                 |
| 2011                     | 5.2            | 10.7                  | 3.3           | 0.0 - 8.3                  |
| 2012                     | 4.8            | 10.3                  | 3.0           | -0.3 - 7.7                 |
| 2013                     | 4.8            | 11.1                  | 3.0           | 0.0 - 7.3                  |
| 2014                     | 5.2            | 9.6                   | 3.7           | 0.3 - 8.3                  |
| 2015                     | 5.0            | 11.1                  | 3.3           | -0.3 - 8.7                 |
| <b>Overall</b>           | <b>4.6</b>     | <b>9.7</b>            | <b>3.0</b>    | <b>-0.3 - 7.7</b>          |

<sup>1</sup> The period for which encounters were averaged (as number per year) was 0 to 365 days after diagnosis for AGW; <sup>2</sup> Standard deviation; <sup>3</sup> Q1 and Q3 are the first and third quartile respectively

Supplementary Table 122 **Distribution of excess number of hospital admissions<sup>1</sup> (per year) due to anogenital warts (for patients compared to their matches) among Manitoba males by year of diagnosis (1997-2015).**

| <b>Year of diagnosis</b> | <b>Average</b> | <b>SD<sup>2</sup></b> | <b>Median</b> | <b>Q1 - Q3<sup>3</sup></b> |
|--------------------------|----------------|-----------------------|---------------|----------------------------|
| 1997                     | 0.3            | 0.7                   | 0.0           | 0.0 - 0.7                  |
| 1998                     | 0.3            | 0.8                   | 0.0           | 0.0 - 0.7                  |
| 1999                     | 0.2            | 0.6                   | 0.0           | 0.0 - 0.0                  |
| 2000                     | 0.3            | 0.8                   | 0.0           | 0.0 - 0.7                  |
| 2001                     | 0.3            | 1.2                   | 0.0           | 0.0 - 0.0                  |
| 2002                     | 0.1            | 0.6                   | 0.0           | 0.0 - 0.0                  |
| 2003                     | 0.2            | 0.6                   | 0.0           | 0.0 - 0.0                  |
| 2004                     | 0.2            | 0.7                   | 0.0           | 0.0 - 0.0                  |
| 2005                     | 0.1            | 0.6                   | 0.0           | 0.0 - 0.0                  |
| 2006                     | 0.1            | 0.6                   | 0.0           | 0.0 - 0.0                  |
| 2007                     | 0.1            | 0.7                   | 0.0           | 0.0 - 0.0                  |
| 2008                     | 0.2            | 1.0                   | 0.0           | 0.0 - 0.0                  |
| 2009                     | 0.1            | 0.6                   | 0.0           | 0.0 - 0.0                  |
| 2010                     | 0.1            | 0.5                   | 0.0           | 0.0 - 0.0                  |
| 2011                     | 0.1            | 0.5                   | 0.0           | 0.0 - 0.0                  |
| 2012                     | 0.1            | 0.5                   | 0.0           | 0.0 - 0.0                  |
| 2013                     | 0.1            | 0.5                   | 0.0           | 0.0 - 0.0                  |
| 2014                     | 0.1            | 0.6                   | 0.0           | 0.0 - 0.0                  |
| 2015                     | 0.1            | 0.6                   | 0.0           | 0.0 - 0.0                  |
| <b>Overall</b>           | <b>0.2</b>     | <b>0.7</b>            | <b>0.0</b>    | <b>0.0 - 0.0</b>           |

<sup>1</sup> The period for which encounters were averaged (as number per year) was 0 to 365 days after diagnosis for AGW; <sup>2</sup> Standard deviation; <sup>3</sup> Q1 and Q3 are the first and third quartile respectively



Supplementary Table 123 **Distribution of excess number of ER visits<sup>1,2</sup> (per year) due to anogenital warts (for patients compared to their matches) among Manitoba males by year of diagnosis (1997-2015).**

| <b>Year of diagnosis</b> | <b>Average</b> | <b>SD<sup>3</sup></b> | <b>Median</b> | <b>Q1 - Q3<sup>4</sup></b> |
|--------------------------|----------------|-----------------------|---------------|----------------------------|
| 1997                     | 0.0            | 0.0                   | 0.0           | 0.0 - 0.0                  |
| 1998                     | 0.0            | 0.3                   | 0.0           | 0.0 - 0.0                  |
| 1999                     | 0.0            | 0.9                   | 0.0           | -0.3 - 0.0                 |
| 2000                     | 0.2            | 1.1                   | 0.0           | -0.3 - 0.0                 |
| 2001                     | 0.1            | 1.1                   | 0.0           | -0.3 - 0.0                 |
| 2002                     | 0.1            | 1.1                   | 0.0           | -0.3 - 0.0                 |
| 2003                     | 0.1            | 1.0                   | 0.0           | -0.3 - 0.0                 |
| 2004                     | 0.2            | 2.7                   | 0.0           | -0.3 - 0.0                 |
| 2005                     | 0.2            | 1.3                   | 0.0           | -0.3 - 0.0                 |
| 2006                     | 0.1            | 1.0                   | 0.0           | -0.3 - 0.0                 |
| 2007                     | 0.1            | 1.1                   | 0.0           | -0.3 - 0.0                 |
| 2008                     | 0.1            | 1.3                   | 0.0           | -0.3 - 0.0                 |
| 2009                     | 0.0            | 2.1                   | 0.0           | -0.3 - 0.0                 |
| 2010                     | 0.1            | 1.0                   | 0.0           | -0.3 - 0.0                 |
| 2011                     | 0.1            | 0.9                   | 0.0           | -0.3 - 0.0                 |
| 2012                     | 0.1            | 1.0                   | 0.0           | -0.3 - 0.0                 |
| 2013                     | 0.1            | 1.4                   | 0.0           | -0.3 - 0.0                 |
| 2014                     | 0.2            | 1.0                   | 0.0           | 0.0 - 0.0                  |
| 2015                     | 0.0            | 0.1                   | 0.0           | 0.0 - 0.0                  |
| <b>Overall</b>           | <b>0.1</b>     | <b>1.2</b>            | <b>0.0</b>    | <b>-0.3 - 0.0</b>          |

<sup>1</sup> ER visits are for the Winnipeg Regional Health Authority only; <sup>2</sup> The period for which encounters were averaged (as number per year) was 0 to 365 days after diagnosis for AGW; <sup>3</sup> Standard deviation; <sup>4</sup> Q1 and Q3 are the first and third quartile respectively

Supplementary Table 124 **Distribution of excess number of prescriptions<sup>1</sup> (per year) due to anogenital warts (for patients compared to their matches) among Manitoba males by year of diagnosis (1997-2015).**

| <b>Year of diagnosis</b> | <b>Average</b> | <b>SD<sup>2</sup></b> | <b>Median</b> | <b>Q1 - Q3<sup>3</sup></b> |
|--------------------------|----------------|-----------------------|---------------|----------------------------|
| 1997                     | 3.2            | 16.1                  | 0.3           | -1.3 - 3.7                 |
| 1998                     | 3.0            | 17.1                  | 0.3           | -1.7 - 4.0                 |
| 1999                     | 0.9            | 12.3                  | 0.0           | -2.3 - 2.7                 |
| 2000                     | 2.7            | 20.1                  | 0.0           | -2.0 - 4.0                 |
| 2001                     | 2.9            | 17.0                  | 0.0           | -2.0 - 3.0                 |
| 2002                     | 0.8            | 19.2                  | 0.0           | -2.3 - 3.0                 |
| 2003                     | 3.3            | 23.9                  | 0.0           | -2.0 - 3.7                 |
| 2004                     | 2.6            | 21.4                  | 0.3           | -2.0 - 4.0                 |
| 2005                     | 0.7            | 17.3                  | 0.0           | -2.7 - 3.7                 |
| 2006                     | 0.7            | 20.9                  | 0.0           | -2.7 - 4.0                 |
| 2007                     | 2.7            | 23.3                  | 0.3           | -2.0 - 4.0                 |
| 2008                     | 1.6            | 31.9                  | 0.3           | -2.3 - 5.0                 |
| 2009                     | 2.8            | 35.4                  | 0.0           | -2.7 - 4.3                 |
| 2010                     | 2.8            | 22.9                  | 0.3           | -2.7 - 4.3                 |
| 2011                     | 3.3            | 26.9                  | 0.3           | -2.3 - 5.0                 |
| 2012                     | 2.5            | 32.0                  | 0.0           | -2.7 - 4.0                 |
| 2013                     | 1.3            | 30.5                  | 0.3           | -2.7 - 5.0                 |
| 2014                     | 3.4            | 35.2                  | 0.0           | -2.7 - 5.0                 |
| 2015                     | 3.9            | 35.0                  | 0.3           | -3.3 - 5.3                 |
| <b>Overall</b>           | <b>2.4</b>     | <b>25.9</b>           | <b>0.0</b>    | <b>-2.3 - 4.0</b>          |

<sup>1</sup> The period for which encounters were averaged (as number per year) was 0 to 365 days after diagnosis for AGW; <sup>2</sup> Standard deviation; <sup>3</sup> Q1 and Q3 are the first and third quartile respectively

Supplementary Table 125 **Distribution of excess number of clinician visits<sup>1</sup> (per year) due to HPV-related carcinoma *in situ* (for patients compared to their matches) among Manitoba males by year of diagnosis (1997-2015).**

| <b>Year of diagnosis</b> | <b>Average</b> | <b>SD<sup>2</sup></b> | <b>Median</b> | <b>Q1 - Q3<sup>3</sup></b> |
|--------------------------|----------------|-----------------------|---------------|----------------------------|
| 1997                     | 3.8            | 1.6                   | 3.8           | 2.7 - 5.0                  |
| 1998                     | 12.2           | 8.2                   | 13.0          | 3.7 - 20.0                 |
| 1999                     | 5.2            | 1.6                   | 5.2           | 4.0 - 6.3                  |
| 2000                     | 13.8           | 8.0                   | 15.3          | 7.2 - 20.3                 |
| 2001                     | 8.4            | 18.7                  | -2.0          | -2.7 - 30.0                |
| 2002                     | 18.8           | 8.5                   | 17.5          | 14.0 - 26.3                |
| 2003                     | 8.2            | 8.7                   | 8.2           | 2.0 - 14.3                 |
| 2004                     | 4.0            | 8.8                   | 3.3           | 0.7 - 9.0                  |
| 2005                     | 6.7            | 14.0                  | 0.3           | -1.0 - 14.3                |
| 2006                     | 3.9            | 13.7                  | -2.7          | -5.3 - 19.7                |
| 2007                     | 1.3            | 4.2                   | 2.5           | -1.7 - 4.2                 |
| 2008                     | 16.7           | 0.0                   | 16.7          | 16.7 - 16.7                |
| 2009                     | 16.7           | 13.5                  | 11.0          | 9.7 - 17.7                 |
| 2010                     | 6.3            | 17.1                  | -0.2          | -5.2 - 17.7                |
| 2011                     | 12.3           | 19.8                  | 4.0           | 2.0 - 15.7                 |
| 2012                     | 7.9            | 12.2                  | 6.7           | -3.7 - 20.7                |
| 2013                     | 7.5            | 9.5                   | 7.5           | 0.0 - 17.3                 |
| 2014                     | 5.2            | 7.5                   | 4.7           | 1.0 - 10.7                 |
| 2015                     | 4.1            | 4.2                   | 4.0           | 2.0 - 4.0                  |
| <b>Overall</b>           | <b>8.6</b>     | <b>11.1</b>           | <b>4.8</b>    | <b>1.2 - 15.8</b>          |

<sup>1</sup> The period for which encounters were averaged (as number per year) was 0 to 365 days after diagnosis for carcinoma *in situ*; <sup>2</sup> Standard deviation; <sup>3</sup> Q1 and Q3 are the first and third quartile respectively

Supplementary Table 126 **Distribution of excess number of hospital admissions<sup>1</sup> (per year) due to HPV-related carcinoma *in situ* (for patients compared to their matches) among Manitoba males by year of diagnosis (1997-2015).**

| <b>Year of diagnosis</b> | <b>Average</b> | <b>SD<sup>2</sup></b> | <b>Median</b> | <b>Q1 - Q3<sup>3</sup></b> |
|--------------------------|----------------|-----------------------|---------------|----------------------------|
| 1997                     | 1.3            | 0.9                   | 1.3           | 0.7 - 2.0                  |
| 1998                     | 1.0            | 0.0                   | 1.0           | 1.0 - 1.0                  |
| 1999                     | 1.2            | 1.2                   | 1.2           | 0.3 - 2.0                  |
| 2000                     | 1.0            | 0.8                   | 1.0           | 0.5 - 1.5                  |
| 2001                     | 1.0            | 0.0                   | 1.0           | 1.0 - 1.0                  |
| 2002                     | 0.8            | 0.8                   | 0.8           | 0.0 - 1.7                  |
| 2003                     | 0.8            | 1.2                   | 0.8           | 0.0 - 1.7                  |
| 2004                     | 0.7            | 1.1                   | 1.0           | 0.0 - 1.7                  |
| 2005                     | 0.3            | 0.9                   | 0.2           | -0.5 - 1.0                 |
| 2006                     | 0.9            | 1.2                   | 1.0           | -0.3 - 2.0                 |
| 2007                     | 0.3            | 0.9                   | 0.0           | -0.2 - 0.8                 |
| 2008                     | 2.5            | 0.7                   | 2.5           | 2.0 - 3.0                  |
| 2009                     | 1.2            | 0.8                   | 1.3           | 0.7 - 2.0                  |
| 2010                     | -0.4           | 1.3                   | -0.3          | -1.3 - 0.5                 |
| 2011                     | 0.8            | 1.3                   | 0.3           | 0.0 - 0.7                  |
| 2012                     | 0.7            | 0.6                   | 1.0           | 0.0 - 1.0                  |
| 2013                     | 0.8            | 1.7                   | 0.5           | -0.3 - 1.0                 |
| 2014                     | 0.6            | 1.4                   | 0.0           | -0.3 - 2.0                 |
| 2015                     | 0.4            | 0.4                   | 0.3           | 0.0 - 0.7                  |
| <b>Overall</b>           | <b>0.8</b>     | <b>1.0</b>            | <b>0.7</b>    | <b>0.0 - 1.3</b>           |

<sup>1</sup> The period for which encounters were averaged (as number per year) was 0 to 365 days after diagnosis for carcinoma *in situ*; <sup>2</sup> Standard deviation; <sup>3</sup> Q1 and Q3 are the first and third quartile respectively

Supplementary Table 127 **Distribution of excess number of ER visits<sup>1,2</sup> (per year) due to HPV-related carcinoma *in situ* (for patients compared to their matches) among Manitoba males by year of diagnosis (1997-2015).**

| <b>Year of diagnosis</b> | <b>Average</b> | <b>SD<sup>3</sup></b> | <b>Median</b> | <b>Q1 - Q3<sup>4</sup></b> |
|--------------------------|----------------|-----------------------|---------------|----------------------------|
| 1997                     | 0.0            |                       | 0.0           | 0.0 - 0.0                  |
| 1998                     | 0.0            | 0.0                   | 0.0           | 0.0 - 0.0                  |
| 1999                     | 1.0            |                       | 1.0           | 1.0 - 1.0                  |
| 2000                     | 1.3            | 2.3                   | 0.0           | 0.0 - 4.0                  |
| 2001                     | 0.4            | 0.5                   | 0.3           | 0.0 - 1.0                  |
| 2002                     | -0.1           | 0.2                   | 0.0           | -0.2 - 0.0                 |
| 2003                     | 1.7            |                       | 1.7           | 1.7 - 1.7                  |
| 2004                     | -0.1           | 1.8                   | 0.0           | -0.7 - 0.0                 |
| 2005                     | -0.4           | 0.2                   | -0.3          | -0.7 - -0.3                |
| 2006                     | -0.7           | 0.9                   | -0.3          | -1.7 - 0.0                 |
| 2007                     | -0.1           | 0.2                   | 0.0           | -0.3 - 0.0                 |
| 2008                     | 1.3            | 2.8                   | 1.3           | -0.7 - 3.3                 |
| 2009                     | -0.1           | 1.4                   | -0.7          | -1.0 - 0.8                 |
| 2010                     | -0.2           | 0.4                   | 0.0           | -0.7 - 0.0                 |
| 2011                     | -1.7           | 2.9                   | -0.3          | -5.0 - 0.3                 |
| 2012                     | 0.0            | 0.6                   | -0.3          | -0.3 - 0.7                 |
| 2013                     | -0.8           | 1.5                   | -1.0          | -2.0 - 0.5                 |
| 2014                     | 0.0            | 1.2                   | -0.3          | -0.7 - 0.0                 |
| 2015                     | 0.0            | 0.0                   | 0.0           | 0.0 - 0.0                  |
| <b>Overall</b>           | <b>-0.0</b>    | <b>1.3</b>            | <b>0.0</b>    | <b>-0.3 - 0.0</b>          |

<sup>1</sup> ER visits are for the Winnipeg Regional Health Authority only; <sup>2</sup> The period for which encounters were averaged (as number per year) was 0 to 365 days after diagnosis for carcinoma *in situ*; <sup>3</sup> Standard deviation; <sup>4</sup> Q1 and Q3 are the first and third quartile respectively

Supplementary Table 128 **Distribution of excess number of prescriptions<sup>1</sup> (per year) due to HPV-related carcinoma *in situ* (for patients compared to their matches) among Manitoba males by year of diagnosis (1997-2015).**

| <b>Year of diagnosis</b> | <b>Average</b> | <b>SD<sup>2</sup></b> | <b>Median</b> | <b>Q1 - Q3<sup>3</sup></b> |
|--------------------------|----------------|-----------------------|---------------|----------------------------|
| 1997                     | 4.8            | 0.7                   | 4.8           | 4.3 - 5.3                  |
| 1998                     | 36.4           | 47.1                  | 41.7          | -13.0 - 80.7               |
| 1999                     | 1.8            | 1.6                   | 1.8           | 0.7 - 3.0                  |
| 2000                     | 8.6            | 8.7                   | 6.3           | 2.3 - 14.8                 |
| 2001                     | 23.9           | 57.7                  | -1.7          | -16.7 - 90.0               |
| 2002                     | 11.6           | 31.2                  | -0.7          | -10.7 - 27.7               |
| 2003                     | 43.0           | 70.2                  | 43.0          | -6.7 - 92.7                |
| 2004                     | 11.0           | 57.5                  | -1.0          | -21.0 - 5.7                |
| 2005                     | -3.6           | 20.3                  | -3.2          | -20.8 - 13.7               |
| 2006                     | -2.2           | 12.2                  | 4.3           | -16.3 - 5.3                |
| 2007                     | 18.5           | 34.8                  | 7.0           | -1.3 - 38.3                |
| 2008                     | 76.7           | 96.6                  | 76.7          | 8.3 - 145.0                |
| 2009                     | -3.2           | 40.4                  | 7.3           | -39.0 - 25.7               |
| 2010                     | -48.3          | 98.6                  | -1.3          | -99.7 - 3.2                |
| 2011                     | 30.2           | 71.5                  | 8.3           | 2.3 - 29.7                 |
| 2012                     | -21.4          | 18.3                  | -31.3         | -32.7 - -0.3               |
| 2013                     | 18.5           | 69.8                  | 8.0           | -10.7 - 22.0               |
| 2014                     | -1.0           | 14.9                  | -2.7          | -15.3 - 15.7               |
| 2015                     | 20.4           | 53.0                  | -0.7          | -5.7 - -0.3                |
| <b>Overall</b>           | <b>9.6</b>     | <b>49.6</b>           | <b>1.8</b>    | <b>-10.0 - 14.2</b>        |

<sup>1</sup> The period for which encounters were averaged (as number per year) was 0 to 365 days after diagnosis for carcinoma *in situ*; <sup>2</sup> Standard deviation; <sup>3</sup> Q1 and Q3 are the first and third quartile respectively

Supplementary Table 129 **Distribution of excess number of clinician visits<sup>1</sup> (per year) due to HPV-related invasive cancer (for patients compared to their matches) among Manitoba males by year of diagnosis (1997-2015).**

| <b>Year of diagnosis</b> | <b>Average</b> | <b>SD<sup>2</sup></b> | <b>Median</b> | <b>Q1 - Q3<sup>3</sup></b> |
|--------------------------|----------------|-----------------------|---------------|----------------------------|
| 1997                     | 7.5            | 10.5                  | 6.8           | 1.3 - 10.6                 |
| 1998                     | 9.0            | 16.4                  | 7.7           | 1.6 - 16.8                 |
| 1999                     | 8.9            | 12.1                  | 7.3           | 0.7 - 14.0                 |
| 2000                     | 8.1            | 10.7                  | 6.7           | 2.9 - 15.1                 |
| 2001                     | 8.5            | 15.1                  | 10.0          | 2.3 - 19.3                 |
| 2002                     | 13.9           | 11.7                  | 10.1          | 6.2 - 18.3                 |
| 2003                     | 11.2           | 12.6                  | 9.9           | 4.5 - 16.6                 |
| 2004                     | 13.3           | 18.0                  | 10.7          | 5.9 - 22.7                 |
| 2005                     | 11.5           | 14.2                  | 10.4          | 5.9 - 18.7                 |
| 2006                     | 11.8           | 14.7                  | 9.3           | 3.1 - 18.1                 |
| 2007                     | 9.2            | 13.9                  | 7.7           | 3.1 - 15.7                 |
| 2008                     | 12.0           | 17.3                  | 9.1           | 2.9 - 17.1                 |
| 2009                     | 10.7           | 13.9                  | 8.5           | 5.2 - 13.8                 |
| 2010                     | 9.5            | 10.6                  | 8.7           | 1.7 - 14.6                 |
| 2011                     | 14.5           | 23.3                  | 10.9          | 4.4 - 17.9                 |
| 2012                     | 12.5           | 12.6                  | 8.0           | 2.9 - 18.4                 |
| 2013                     | 9.6            | 16.7                  | 9.0           | 2.3 - 17.2                 |
| 2014                     | 8.7            | 17.1                  | 8.2           | 0.5 - 16.8                 |
| 2015                     | 4.7            | 16.0                  | 6.1           | -0.3 - 11.5                |
| <b>Overall</b>           | <b>10.2</b>    | <b>15.4</b>           | <b>8.8</b>    | <b>3.0 - 16.7</b>          |

<sup>1</sup> The periods for which encounters were averaged (as number per year) was 180 days before to 730 days after diagnosis for invasive cancer; <sup>2</sup> Standard deviation; <sup>3</sup> Q1 and Q3 are the first and third quartile respectively

Supplementary Table 130 **Distribution of excess number of hospital admissions<sup>1</sup> (per year) due to HPV-related invasive cancer (for patients compared to their matches) among Manitoba males by year of diagnosis (1997-2015).**

| <b>Year of diagnosis</b> | <b>Average</b> | <b>SD<sup>2</sup></b> | <b>Median</b> | <b>Q1 - Q3<sup>3</sup></b> |
|--------------------------|----------------|-----------------------|---------------|----------------------------|
| 1997                     | 1.1            | 1.1                   | 0.8           | 0.4 - 1.7                  |
| 1998                     | 1.4            | 2.2                   | 1.0           | 0.1 - 2.3                  |
| 1999                     | 1.2            | 1.0                   | 1.0           | 0.4 - 1.9                  |
| 2000                     | 1.0            | 1.3                   | 0.7           | 0.3 - 1.4                  |
| 2001                     | 1.2            | 1.1                   | 0.9           | 0.5 - 1.6                  |
| 2002                     | 1.6            | 1.3                   | 1.2           | 0.8 - 2.1                  |
| 2003                     | 0.9            | 1.2                   | 0.7           | 0.3 - 1.3                  |
| 2004                     | 1.2            | 1.4                   | 0.9           | 0.3 - 1.7                  |
| 2005                     | 1.1            | 1.0                   | 0.8           | 0.4 - 1.9                  |
| 2006                     | 0.9            | 1.0                   | 0.8           | 0.3 - 1.6                  |
| 2007                     | 0.9            | 1.3                   | 0.8           | 0.4 - 1.5                  |
| 2008                     | 1.2            | 1.2                   | 0.8           | 0.4 - 2.0                  |
| 2009                     | 1.1            | 1.4                   | 0.8           | 0.4 - 1.3                  |
| 2010                     | 0.9            | 0.8                   | 0.8           | 0.4 - 1.6                  |
| 2011                     | 1.0            | 0.9                   | 0.7           | 0.4 - 1.5                  |
| 2012                     | 1.0            | 1.1                   | 0.8           | 0.3 - 1.5                  |
| 2013                     | 0.8            | 1.1                   | 0.8           | 0.3 - 1.2                  |
| 2014                     | 0.9            | 1.0                   | 0.5           | 0.1 - 1.3                  |
| 2015                     | 0.7            | 1.1                   | 0.4           | 0.1 - 1.0                  |
| <b>Overall</b>           | <b>1.0</b>     | <b>1.2</b>            | <b>0.8</b>    | <b>0.4 - 1.6</b>           |

<sup>1</sup> The periods for which encounters were averaged (as number per year) was 180 days before to 730 days after diagnosis for invasive cancer; <sup>2</sup> Standard deviation; <sup>3</sup> Q1 and Q3 are the first and third quartile respectively



Supplementary Table 131 **Distribution of excess number of ER visits<sup>1,2</sup> (per year) due to HPV-related invasive cancer (for patients compared to their matches) among Manitoba males by year of diagnosis (1997-2015).**

| <b>Year of diagnosis</b> | <b>Average</b> | <b>SD<sup>3</sup></b> | <b>Median</b> | <b>Q1 - Q3<sup>4</sup></b> |
|--------------------------|----------------|-----------------------|---------------|----------------------------|
| 1997                     | 0.0            | 0.1                   | 0.0           | 0.0 - 0.0                  |
| 1998                     | 0.3            | 1.1                   | 0.0           | -0.1 - 0.3                 |
| 1999                     | 0.7            | 2.2                   | 0.0           | -0.1 - 0.8                 |
| 2000                     | 0.0            | 0.9                   | -0.1          | -0.4 - 0.3                 |
| 2001                     | 0.3            | 0.9                   | 0.0           | -0.1 - 1.0                 |
| 2002                     | 0.8            | 1.7                   | 0.4           | -0.1 - 1.0                 |
| 2003                     | 0.3            | 0.7                   | 0.1           | -0.1 - 0.4                 |
| 2004                     | 1.7            | 6.8                   | 0.3           | -0.1 - 1.0                 |
| 2005                     | 0.3            | 0.9                   | 0.1           | 0.0 - 1.1                  |
| 2006                     | 0.4            | 1.1                   | 0.1           | -0.3 - 0.5                 |
| 2007                     | 0.1            | 1.1                   | 0.0           | -0.3 - 0.6                 |
| 2008                     | 0.1            | 1.0                   | 0.3           | -0.4 - 0.5                 |
| 2009                     | 1.0            | 1.9                   | 0.4           | 0.0 - 1.2                  |
| 2010                     | 0.3            | 1.1                   | 0.1           | -0.1 - 0.5                 |
| 2011                     | 0.7            | 1.5                   | 0.3           | 0.0 - 0.7                  |
| 2012                     | 0.7            | 1.3                   | 0.1           | -0.1 - 1.2                 |
| 2013                     | 1.2            | 3.8                   | 0.1           | -0.3 - 0.8                 |
| 2014                     | 0.1            | 0.6                   | 0.0           | -0.1 - 0.4                 |
| 2015                     | -0.0           | 0.3                   | 0.0           | 0.0 - 0.0                  |
| <b>Overall</b>           | <b>0.5</b>     | <b>2.1</b>            | <b>0.0</b>    | <b>-0.1 - 0.5</b>          |

<sup>1</sup> ER visits are for the Winnipeg Regional Health Authority only; <sup>2</sup> The periods for which encounters were averaged (as number per year) was 180 days before to 730 days after diagnosis for invasive cancer; <sup>3</sup> Standard deviation; <sup>4</sup> Q1 and Q3 are the first and third quartile respectively

Supplementary Table 132 **Distribution of excess number of prescriptions<sup>1</sup> (per year) due to HPV-related invasive cancer (for patients compared to their matches) among Manitoba males by year of diagnosis (1997-2015).**

| <b>Year of diagnosis</b> | <b>Average</b> | <b>SD<sup>2</sup></b> | <b>Median</b> | <b>Q1 - Q3<sup>3</sup></b> |
|--------------------------|----------------|-----------------------|---------------|----------------------------|
| 1997                     | 11.2           | 29.2                  | 6.9           | 0.2 - 16.7                 |
| 1998                     | 12.8           | 22.7                  | 9.1           | 1.2 - 23.2                 |
| 1999                     | 15.0           | 39.4                  | 7.3           | -2.8 - 27.9                |
| 2000                     | 13.0           | 27.5                  | 7.2           | -2.7 - 24.2                |
| 2001                     | 13.3           | 32.7                  | 11.6          | -0.7 - 22.8                |
| 2002                     | 20.2           | 38.1                  | 6.7           | -0.5 - 47.6                |
| 2003                     | 12.6           | 23.9                  | 7.7           | -4.8 - 26.7                |
| 2004                     | 13.8           | 45.4                  | 9.3           | -11.5 - 31.9               |
| 2005                     | 5.5            | 30.6                  | 6.0           | -10.4 - 28.9               |
| 2006                     | 4.5            | 30.9                  | 2.3           | -7.5 - 21.2                |
| 2007                     | -13.4          | 91.1                  | -2.8          | -27.1 - 13.5               |
| 2008                     | 9.4            | 87.7                  | 0.3           | -18.9 - 28.3               |
| 2009                     | 1.9            | 71.4                  | 0.8           | -13.7 - 16.9               |
| 2010                     | 10.0           | 44.6                  | 3.3           | -7.9 - 16.8                |
| 2011                     | 22.3           | 100.7                 | 4.3           | -6.8 - 33.1                |
| 2012                     | 9.6            | 116.4                 | 17.6          | -0.9 - 40.1                |
| 2013                     | 33.9           | 221.9                 | 9.3           | -3.9 - 25.6                |
| 2014                     | 32.0           | 164.1                 | 7.0           | -10.1 - 22.7               |
| 2015                     | -0.2           | 49.3                  | -0.2          | -12.9 - 12.9               |
| <b>Overall</b>           | <b>12.2</b>    | <b>91.5</b>           | <b>6.0</b>    | <b>-7.9 - 24.6</b>         |

<sup>1</sup> The periods for which encounters were averaged (as number per year) was 180 days before to 730 days after diagnosis for invasive cancer; <sup>2</sup> Standard deviation; <sup>3</sup> Q1 and Q3 are the first and third quartile respectively

Supplementary Table 133 **Distribution of excess number of clinician visits<sup>1</sup> (per year) due to invasive cancer of the anus (for patients compared to their matches) among Manitoba males by year of diagnosis (1997-2015).**

| <b>Year of diagnosis</b> | <b>Average</b> | <b>SD<sup>2</sup></b> | <b>Median</b> | <b>Q1 - Q3<sup>3</sup></b> |
|--------------------------|----------------|-----------------------|---------------|----------------------------|
| 1997                     | 7.1            |                       | 7.1           | 7.1 - 7.1                  |
| 1998                     | 12.6           | 7.5                   | 14.8          | 4.3 - 18.7                 |
| 1999                     | 14.7           | 15.3                  | 14.0          | -0.2 - 30.3                |
| 2000                     | 9.6            |                       | 9.6           | 9.6 - 9.6                  |
| 2002                     | 11.9           | 8.1                   | 11.9          | 6.2 - 17.7                 |
| 2003                     | 10.5           |                       | 10.5          | 10.5 - 10.5                |
| 2004                     | 32.7           | 32.9                  | 25.5          | 19.1 - 29.9                |
| 2005                     | 23.6           | 11.1                  | 23.6          | 15.7 - 31.5                |
| 2006                     | 10.2           | 1.0                   | 10.0          | 9.3 - 11.3                 |
| 2007                     | 21.4           | 19.5                  | 13.5          | 6.7 - 38.8                 |
| 2008                     | 21.4           | 16.3                  | 15.1          | 9.5 - 34.4                 |
| 2009                     | 25.8           | 29.2                  | 14.9          | 7.6 - 44.0                 |
| 2010                     | 16.5           | 12.5                  | 13.0          | 8.3 - 24.7                 |
| 2011                     | 8.9            | 7.9                   | 10.9          | 4.3 - 13.5                 |
| 2012                     | 0.9            | 2.5                   | 0.9           | -0.8 - 2.7                 |
| 2013                     | 22.9           | 7.3                   | 18.0          | 17.2 - 31.2                |
| 2014                     | 1.3            | 50.6                  | 21.7          | -12.8 - 28.4               |
| 2015                     | 9.1            | 4.1                   | 8.1           | 5.2 - 12.7                 |
| <b>Overall</b>           | <b>16.2</b>    | <b>20.6</b>           | <b>14.4</b>   | <b>6.9 - 23.6</b>          |

<sup>1</sup> The periods for which encounters were averaged (as number per year) was 180 days before to 730 days after diagnosis for invasive cancer; <sup>2</sup> Standard deviation; <sup>3</sup> Q1 and Q3 are the first and third quartile respectively

Supplementary Table 134 **Distribution of excess number of hospital admissions<sup>1</sup> (per year) due to invasive cancer of the anus (for patients compared to their matches) among Manitoba males by year of diagnosis (1997-2015).**

| <b>Year of diagnosis</b> | <b>Average</b> | <b>SD<sup>2</sup></b> | <b>Median</b> | <b>Q1 - Q3<sup>3</sup></b> |
|--------------------------|----------------|-----------------------|---------------|----------------------------|
| 1997                     | 2.0            |                       | 2.0           | 2.0 - 2.0                  |
| 1998                     | 1.9            | 1.7                   | 2.4           | 0.0 - 3.2                  |
| 1999                     | 1.3            | 0.4                   | 1.2           | 1.0 - 1.8                  |
| 2000                     | 1.6            |                       | 1.6           | 1.6 - 1.6                  |
| 2002                     | 2.6            | 0.4                   | 2.6           | 2.4 - 2.9                  |
| 2003                     | 1.6            |                       | 1.6           | 1.6 - 1.6                  |
| 2004                     | 2.6            | 2.8                   | 1.6           | 1.3 - 2.4                  |
| 2005                     | 1.4            | 0.8                   | 1.4           | 0.8 - 2.0                  |
| 2006                     | 0.9            | 0.1                   | 0.9           | 0.8 - 1.1                  |
| 2007                     | 1.8            | 1.7                   | 1.6           | 0.4 - 3.2                  |
| 2008                     | 1.8            | 1.0                   | 2.3           | 0.8 - 2.5                  |
| 2009                     | 3.2            | 3.4                   | 2.0           | 1.1 - 5.4                  |
| 2010                     | 1.5            | 0.9                   | 1.4           | 0.7 - 2.2                  |
| 2011                     | 0.7            | 0.7                   | 0.6           | 0.3 - 1.1                  |
| 2012                     | 0.6            | 0.5                   | 0.6           | 0.3 - 0.9                  |
| 2013                     | 2.1            | 1.4                   | 1.5           | 1.1 - 3.6                  |
| 2014                     | 1.7            | 1.0                   | 2.0           | 1.3 - 2.1                  |
| 2015                     | 1.3            | 2.0                   | 0.7           | -0.1 - 1.7                 |
| <b>Overall</b>           | <b>1.8</b>     | <b>1.6</b>            | <b>1.4</b>    | <b>0.7 - 2.4</b>           |

<sup>1</sup> The periods for which encounters were averaged (as number per year) was 180 days before to 730 days after diagnosis for invasive cancer; <sup>2</sup> Standard deviation; <sup>3</sup> Q1 and Q3 are the first and third quartile respectively

Supplementary Table 135 **Distribution of excess number of ER visits<sup>1,2</sup> (per year) due to invasive cancer of the anus (for patients compared to their matches) among Manitoba males by year of diagnosis (1997-2015).**

| <b>Year of diagnosis</b> | <b>Average</b> | <b>SD<sup>3</sup></b> | <b>Median</b> | <b>Q1 - Q3<sup>4</sup></b> |
|--------------------------|----------------|-----------------------|---------------|----------------------------|
| 1997                     | 0.3            |                       | 0.3           | 0.3 - 0.3                  |
| 1998                     | 1.2            | 1.2                   | 1.2           | 0.0 - 2.4                  |
| 1999                     | 10.2           |                       | 10.2          | 10.2 - 10.2                |
| 2000                     | -0.3           |                       | -0.3          | -0.3 - -0.3                |
| 2002                     | 0.0            |                       | 0.0           | 0.0 - 0.0                  |
| 2003                     | 0.8            |                       | 0.8           | 0.8 - 0.8                  |
| 2004                     | 10.3           | 18.7                  | 1.4           | 0.7 - 20.0                 |
| 2005                     | 1.5            |                       | 1.5           | 1.5 - 1.5                  |
| 2006                     | 0.0            | 0.5                   | 0.3           | -0.5 - 0.4                 |
| 2007                     | 0.7            | 1.1                   | 0.1           | 0.1 - 1.2                  |
| 2008                     | 0.6            | 1.0                   | 0.6           | -0.1 - 1.2                 |
| 2009                     | 3.1            | 4.1                   | 1.5           | 0.7 - 5.5                  |
| 2010                     | 0.6            | 0.5                   | 0.4           | 0.3 - 1.2                  |
| 2011                     | 0.9            | 1.5                   | 0.4           | -0.3 - 2.7                 |
| 2012                     | 0.0            | 0.8                   | 0.0           | -0.5 - 0.5                 |
| 2013                     | 5.4            | 6.9                   | 2.6           | 1.0 - 9.8                  |
| 2014                     | 0.3            | 0.9                   | 0.0           | -0.4 - 1.2                 |
| 2015                     | 0.0            | 0.0                   | 0.0           | 0.0 - 0.0                  |
| <b>Overall</b>           | <b>2.2</b>     | <b>6.2</b>            | <b>0.4</b>    | <b>0.0 - 1.5</b>           |

<sup>1</sup> ER visits are for the Winnipeg Regional Health Authority only; <sup>2</sup> The periods for which encounters were averaged (as number per year) was 180 days before to 730 days after diagnosis for invasive cancer; <sup>3</sup> Standard deviation; <sup>4</sup> Q1 and Q3 are the first and third quartile respectively

Supplementary Table 136 **Distribution of excess number of prescriptions<sup>1</sup> (per year) due to invasive cancer of the anus (for patients compared to their matches) among Manitoba males by year of diagnosis (1997-2015).**

| <b>Year of diagnosis</b> | <b>Average</b> | <b>SD<sup>2</sup></b> | <b>Median</b> | <b>Q1 - Q3<sup>3</sup></b> |
|--------------------------|----------------|-----------------------|---------------|----------------------------|
| 1997                     | 2.7            |                       | 2.7           | 2.7 - 2.7                  |
| 1998                     | 8.8            | 12.7                  | 5.1           | -1.6 - 22.9                |
| 1999                     | 78.5           | 85.0                  | 32.1          | 26.8 - 176.7               |
| 2000                     | 65.5           |                       | 65.5          | 65.5 - 65.5                |
| 2002                     | 37.4           | 14.5                  | 37.4          | 27.1 - 47.6                |
| 2003                     | 7.2            |                       | 7.2           | 7.2 - 7.2                  |
| 2004                     | 77.6           | 76.8                  | 66.1          | 18.0 - 130.8               |
| 2005                     | 20.0           | 36.8                  | 20.0          | -6.0 - 46.0                |
| 2006                     | 4.1            | 25.9                  | -0.3          | -19.3 - 31.9               |
| 2007                     | 29.9           | 83.4                  | -8.1          | -23.1 - 72.8               |
| 2008                     | 29.8           | 45.9                  | 9.6           | 5.1 - 27.2                 |
| 2009                     | 16.4           | 66.2                  | -14.2         | -18.1 - 50.9               |
| 2010                     | 70.5           | 98.4                  | 29.7          | 13.7 - 127.3               |
| 2011                     | 13.8           | 30.8                  | 4.9           | -6.9 - 34.5                |
| 2012                     | 100.0          | 128.4                 | 100.0         | 9.2 - 190.8                |
| 2013                     | 257.4          | 647.2                 | 9.2           | 3.2 - 33.2                 |
| 2014                     | 304.1          | 544.9                 | 11.6          | 8.8 - 353.4                |
| 2015                     | 0.3            | 9.5                   | 5.1           | -10.9 - 7.5                |
| <b>Overall</b>           | <b>79.8</b>    | <b>266.5</b>          | <b>9.2</b>    | <b>-1.5 - 46.8</b>         |

<sup>1</sup> The periods for which encounters were averaged (as number per year) was 180 days before to 730 days after diagnosis for invasive cancer; <sup>2</sup> Standard deviation; <sup>3</sup> Q1 and Q3 are the first and third quartile respectively

Supplementary Table 137 **Distribution of excess number of clinician visits<sup>1</sup> (per year) due to invasive cancer of the oral cavity (for patients compared to their matches) among Manitoba males by year of diagnosis (1997-2015).**

| <b>Year of diagnosis</b> | <b>Average</b> | <b>SD<sup>2</sup></b> | <b>Median</b> | <b>Q1 - Q3<sup>3</sup></b> |
|--------------------------|----------------|-----------------------|---------------|----------------------------|
| 1997                     | 5.4            | 11.0                  | 6.8           | -0.7 - 8.9                 |
| 1998                     | 8.6            | 12.7                  | 3.1           | 0.3 - 10.8                 |
| 1999                     | 7.9            | 9.9                   | 6.3           | 1.1 - 13.8                 |
| 2000                     | 5.2            | 9.1                   | 3.5           | -0.4 - 6.9                 |
| 2001                     | 6.9            | 12.0                  | 4.0           | -1.5 - 17.0                |
| 2002                     | 11.9           | 7.8                   | 10.8          | 6.3 - 16.8                 |
| 2003                     | 12.5           | 10.8                  | 11.5          | 4.3 - 21.1                 |
| 2004                     | 13.6           | 9.2                   | 10.7          | 7.9 - 19.2                 |
| 2005                     | 11.0           | 17.5                  | 9.5           | 6.4 - 18.3                 |
| 2006                     | 10.7           | 14.7                  | 8.7           | 2.7 - 22.9                 |
| 2007                     | 7.6            | 17.2                  | 8.0           | -2.5 - 16.3                |
| 2008                     | 14.5           | 22.6                  | 8.4           | 2.5 - 16.3                 |
| 2009                     | 8.1            | 13.2                  | 8.0           | 5.3 - 11.5                 |
| 2010                     | 9.3            | 12.0                  | 8.5           | 0.3 - 15.2                 |
| 2011                     | 16.1           | 34.1                  | 12.2          | 3.1 - 17.6                 |
| 2012                     | 15.1           | 14.5                  | 10.1          | 6.1 - 20.5                 |
| 2013                     | 12.8           | 14.4                  | 9.2           | 2.9 - 15.3                 |
| 2014                     | 7.2            | 14.0                  | 2.7           | -0.8 - 8.1                 |
| 2015                     | 5.5            | 17.0                  | 7.9           | -0.8 - 13.3                |
| <b>Overall</b>           | <b>10.1</b>    | <b>16.2</b>           | <b>8.1</b>    | <b>2.1 - 15.5</b>          |

<sup>1</sup> The periods for which encounters were averaged (as number per year) was 180 days before to 730 days after diagnosis for invasive cancer; <sup>2</sup> Standard deviation; <sup>3</sup> Q1 and Q3 are the first and third quartile respectively

Supplementary Table 138 **Distribution of excess number of hospital admissions<sup>1</sup> (per year) due to invasive cancer of the oral cavity (for patients compared to their matches) among Manitoba males by year of diagnosis (1997-2015).**

| <b>Year of diagnosis</b> | <b>Average</b> | <b>SD<sup>2</sup></b> | <b>Median</b> | <b>Q1 - Q3<sup>3</sup></b> |
|--------------------------|----------------|-----------------------|---------------|----------------------------|
| 1997                     | 0.8            | 0.9                   | 0.8           | 0.5 - 1.6                  |
| 1998                     | 1.4            | 2.8                   | 0.8           | 0.1 - 1.5                  |
| 1999                     | 1.1            | 1.0                   | 0.9           | 0.4 - 2.0                  |
| 2000                     | 0.4            | 0.9                   | 0.3           | 0.1 - 0.6                  |
| 2001                     | 1.2            | 1.0                   | 0.9           | 0.4 - 1.6                  |
| 2002                     | 1.3            | 0.7                   | 1.1           | 0.7 - 1.7                  |
| 2003                     | 1.2            | 0.8                   | 1.1           | 0.5 - 1.5                  |
| 2004                     | 1.3            | 1.4                   | 1.0           | 0.4 - 2.0                  |
| 2005                     | 1.2            | 1.2                   | 0.8           | 0.4 - 2.2                  |
| 2006                     | 1.1            | 0.9                   | 0.9           | 0.4 - 1.6                  |
| 2007                     | 0.6            | 1.3                   | 0.7           | 0.3 - 1.4                  |
| 2008                     | 1.2            | 1.0                   | 0.9           | 0.4 - 2.1                  |
| 2009                     | 0.6            | 0.8                   | 0.5           | 0.3 - 1.1                  |
| 2010                     | 0.9            | 0.8                   | 0.8           | 0.4 - 1.6                  |
| 2011                     | 0.9            | 0.8                   | 0.8           | 0.4 - 1.4                  |
| 2012                     | 1.1            | 1.2                   | 0.8           | 0.4 - 1.2                  |
| 2013                     | 0.8            | 0.7                   | 0.8           | 0.3 - 1.3                  |
| 2014                     | 1.0            | 0.8                   | 0.8           | 0.4 - 1.3                  |
| 2015                     | 0.7            | 0.8                   | 0.4           | 0.3 - 0.8                  |
| <b>Overall</b>           | <b>1.0</b>     | <b>1.1</b>            | <b>0.8</b>    | <b>0.4 - 1.6</b>           |

<sup>1</sup> The periods for which encounters were averaged (as number per year) was 180 days before to 730 days after diagnosis for invasive cancer; <sup>2</sup> Standard deviation; <sup>3</sup> Q1 and Q3 are the first and third quartile respectively



Supplementary Table 139 **Distribution of excess number of ER visits<sup>1,2</sup> (per year) due to invasive cancer of the oral cavity (for patients compared to their matches) among Manitoba males by year of diagnosis (1997-2015).**

| <b>Year of diagnosis</b> | <b>Average</b> | <b>SD<sup>3</sup></b> | <b>Median</b> | <b>Q1 - Q3<sup>4</sup></b> |
|--------------------------|----------------|-----------------------|---------------|----------------------------|
| 1997                     | 0.0            | 0.1                   | 0.0           | 0.0 - 0.0                  |
| 1998                     | 0.4            | 1.5                   | 0.0           | -0.1 - 0.2                 |
| 1999                     | 0.4            | 1.3                   | 0.0           | -0.1 - 0.8                 |
| 2000                     | -0.1           | 0.8                   | -0.1          | -0.5 - -0.1                |
| 2001                     | 0.5            | 1.1                   | 0.3           | -0.1 - 1.1                 |
| 2002                     | 0.1            | 0.8                   | 0.3           | -0.6 - 0.8                 |
| 2003                     | 0.1            | 0.4                   | 0.1           | -0.1 - 0.3                 |
| 2004                     | 0.8            | 2.1                   | 0.3           | 0.0 - 1.0                  |
| 2005                     | 0.5            | 0.7                   | 0.3           | 0.0 - 1.2                  |
| 2006                     | 0.3            | 0.8                   | 0.1           | -0.1 - 0.5                 |
| 2007                     | -0.0           | 0.5                   | -0.1          | -0.4 - 0.1                 |
| 2008                     | -0.1           | 0.8                   | 0.3           | -0.3 - 0.4                 |
| 2009                     | 0.4            | 1.0                   | 0.4           | -0.4 - 1.1                 |
| 2010                     | 0.5            | 1.2                   | 0.0           | 0.0 - 0.4                  |
| 2011                     | 0.3            | 1.1                   | 0.3           | -0.1 - 0.7                 |
| 2012                     | 0.5            | 1.2                   | 0.0           | -0.1 - 1.2                 |
| 2013                     | 1.5            | 4.7                   | 0.0           | -0.5 - 1.1                 |
| 2014                     | -0.0           | 0.9                   | 0.0           | -0.1 - 0.4                 |
| 2015                     | -0.1           | 0.5                   | 0.0           | 0.0 - 0.0                  |
| <b>Overall</b>           | <b>0.3</b>     | <b>1.4</b>            | <b>0.0</b>    | <b>-0.1 - 0.5</b>          |

<sup>1</sup> ER visits are for the Winnipeg Regional Health Authority only; <sup>2</sup> The periods for which encounters were averaged (as number per year) was 180 days before to 730 days after diagnosis for invasive cancer; <sup>3</sup> Standard deviation; <sup>4</sup> Q1 and Q3 are the first and third quartile respectively

Supplementary Table 140 **Distribution of excess number of prescriptions<sup>1</sup> (per year) due to invasive cancer of the oral cavity (for patients compared to their matches) among Manitoba males by year of diagnosis (1997-2015).**

| <b>Year of diagnosis</b> | <b>Average</b> | <b>SD<sup>2</sup></b> | <b>Median</b> | <b>Q1 - Q3<sup>3</sup></b> |
|--------------------------|----------------|-----------------------|---------------|----------------------------|
| 1997                     | 10.1           | 39.9                  | 4.7           | -8.9 - 15.2                |
| 1998                     | 10.7           | 26.4                  | 3.2           | -4.1 - 15.6                |
| 1999                     | 14.8           | 30.6                  | 6.7           | -4.9 - 27.9                |
| 2000                     | 17.9           | 35.4                  | 5.2           | -2.7 - 26.3                |
| 2001                     | 22.3           | 31.3                  | 14.9          | -0.7 - 29.6                |
| 2002                     | 13.9           | 33.9                  | 4.2           | -11.7 - 33.5               |
| 2003                     | 12.4           | 22.8                  | 9.9           | -3.9 - 27.5                |
| 2004                     | 12.6           | 31.3                  | 10.1          | -8.5 - 31.9                |
| 2005                     | 1.1            | 29.5                  | 3.1           | -16.7 - 22.3               |
| 2006                     | 9.0            | 26.7                  | 8.0           | -6.7 - 21.2                |
| 2007                     | -33.0          | 135.9                 | -0.8          | -21.2 - 7.1                |
| 2008                     | 41.8           | 100.7                 | 12.1          | -14.0 - 57.1               |
| 2009                     | 21.7           | 70.1                  | 9.7           | -12.9 - 21.9               |
| 2010                     | 2.2            | 36.5                  | -0.4          | -7.9 - 12.8                |
| 2011                     | 30.3           | 155.6                 | 11.9          | -1.7 - 33.1                |
| 2012                     | 21.9           | 31.8                  | 20.6          | 2.8 - 33.4                 |
| 2013                     | 17.6           | 36.6                  | 13.6          | 0.1 - 29.1                 |
| 2014                     | 2.0            | 56.3                  | 2.4           | -38.0 - 16.5               |
| 2015                     | -4.4           | 63.3                  | 11.5          | -19.2 - 24.4               |
| <b>Overall</b>           | <b>11.9</b>    | <b>67.3</b>           | <b>6.8</b>    | <b>-7.9 - 25.0</b>         |

<sup>1</sup> The periods for which encounters were averaged (as number per year) was 180 days before to 730 days after diagnosis for invasive cancer; <sup>2</sup> Standard deviation; <sup>3</sup> Q1 and Q3 are the first and third quartile respectively

Supplementary Table 141 **Distribution of excess number of clinician visits<sup>1</sup> (per year) due to invasive cancer of the oropharynx (for patients compared to their matches) among Manitoba males by year of diagnosis (1997-2015).**

| <b>Year of diagnosis</b> | <b>Average</b> | <b>SD<sup>2</sup></b> | <b>Median</b> | <b>Q1 - Q3<sup>3</sup></b> |
|--------------------------|----------------|-----------------------|---------------|----------------------------|
| 1997                     | 6.9            | 7.4                   | 6.1           | 1.6 - 10.5                 |
| 1998                     | 8.5            | 21.9                  | 11.8          | 4.6 - 21.2                 |
| 1999                     | 13.7           | 14.5                  | 9.9           | 4.3 - 21.0                 |
| 2000                     | 12.6           | 11.0                  | 14.4          | 10.3 - 18.1                |
| 2001                     | 9.3            | 19.0                  | 11.8          | 6.0 - 20.8                 |
| 2002                     | 15.1           | 14.5                  | 10.0          | 6.8 - 20.9                 |
| 2003                     | 10.2           | 12.8                  | 9.9           | 6.3 - 15.4                 |
| 2004                     | 10.0           | 18.7                  | 10.1          | 5.8 - 23.6                 |
| 2005                     | 12.8           | 9.2                   | 11.9          | 6.4 - 19.1                 |
| 2006                     | 11.9           | 16.4                  | 7.0           | 3.2 - 17.9                 |
| 2007                     | 9.1            | 9.6                   | 11.2          | 3.7 - 13.3                 |
| 2008                     | 11.0           | 14.1                  | 11.5          | 3.6 - 18.5                 |
| 2009                     | 11.0           | 9.6                   | 9.5           | 5.2 - 22.3                 |
| 2010                     | 9.6            | 8.2                   | 8.8           | 4.5 - 13.6                 |
| 2011                     | 13.5           | 15.0                  | 9.3           | 4.8 - 17.9                 |
| 2012                     | 11.5           | 11.1                  | 7.3           | 2.3 - 19.7                 |
| 2013                     | 7.1            | 18.0                  | 5.7           | 1.5 - 13.5                 |
| 2014                     | 9.0            | 10.8                  | 8.3           | 3.6 - 14.8                 |
| 2015                     | 5.1            | 11.8                  | 5.2           | 0.1 - 10.7                 |
| <b>Overall</b>           | <b>10.2</b>    | <b>13.8</b>           | <b>9.3</b>    | <b>3.7 - 17.5</b>          |

<sup>1</sup> The periods for which encounters were averaged (as number per year) was 180 days before to 730 days after diagnosis for invasive cancer; <sup>2</sup> Standard deviation; <sup>3</sup> Q1 and Q3 are the first and third quartile respectively

Supplementary Table 142 **Distribution of excess number of hospital admissions<sup>1</sup> (per year) due to invasive cancer of the oropharynx (for patients compared to their matches) among Manitoba males by year of diagnosis (1997-2015).**

| <b>Year of diagnosis</b> | <b>Average</b> | <b>SD<sup>2</sup></b> | <b>Median</b> | <b>Q1 - Q3<sup>3</sup></b> |
|--------------------------|----------------|-----------------------|---------------|----------------------------|
| 1997                     | 1.0            | 1.1                   | 0.7           | 0.4 - 1.2                  |
| 1998                     | 1.4            | 1.4                   | 1.3           | 0.8 - 2.3                  |
| 1999                     | 1.4            | 1.2                   | 1.4           | 0.3 - 2.0                  |
| 2000                     | 1.4            | 1.7                   | 0.8           | 0.5 - 1.6                  |
| 2001                     | 1.2            | 1.4                   | 1.2           | 0.4 - 2.4                  |
| 2002                     | 1.7            | 1.6                   | 1.2           | 0.8 - 2.1                  |
| 2003                     | 0.7            | 1.3                   | 0.6           | 0.3 - 1.2                  |
| 2004                     | 0.8            | 0.9                   | 0.6           | 0.2 - 1.4                  |
| 2005                     | 1.0            | 0.9                   | 0.8           | 0.4 - 1.7                  |
| 2006                     | 0.8            | 1.1                   | 0.4           | 0.1 - 1.3                  |
| 2007                     | 0.9            | 1.2                   | 0.8           | 0.4 - 1.4                  |
| 2008                     | 1.2            | 1.6                   | 0.8           | 0.1 - 1.7                  |
| 2009                     | 1.0            | 0.9                   | 0.8           | 0.5 - 1.2                  |
| 2010                     | 0.8            | 0.9                   | 0.7           | 0.4 - 1.2                  |
| 2011                     | 1.0            | 1.0                   | 0.4           | 0.4 - 1.5                  |
| 2012                     | 0.9            | 1.1                   | 0.7           | 0.3 - 1.7                  |
| 2013                     | 0.7            | 1.1                   | 0.4           | 0.0 - 1.2                  |
| 2014                     | 0.4            | 0.6                   | 0.4           | -0.1 - 0.4                 |
| 2015                     | 0.5            | 1.0                   | 0.4           | 0.0 - 0.8                  |
| <b>Overall</b>           | <b>0.9</b>     | <b>1.2</b>            | <b>0.7</b>    | <b>0.3 - 1.4</b>           |

<sup>1</sup> The periods for which encounters were averaged (as number per year) was 180 days before to 730 days after diagnosis for invasive cancer; <sup>2</sup> Standard deviation; <sup>3</sup> Q1 and Q3 are the first and third quartile respectively

Supplementary Table 143 **Distribution of excess number of ER visits<sup>1,2</sup> (per year) due to invasive cancer of the oropharynx (for patients compared to their matches) among Manitoba males by year of diagnosis (1997-2015).**

| <b>Year of diagnosis</b> | <b>Average</b> | <b>SD<sup>3</sup></b> | <b>Median</b> | <b>Q1 - Q3<sup>4</sup></b> |
|--------------------------|----------------|-----------------------|---------------|----------------------------|
| 1997                     | -0.1           | 0.1                   | 0.0           | -0.1 - 0.0                 |
| 1998                     | 0.1            | 0.2                   | 0.0           | 0.0 - 0.1                  |
| 1999                     | 0.1            | 0.5                   | 0.0           | 0.0 - 0.4                  |
| 2000                     | 0.2            | 1.2                   | 0.3           | -0.7 - 0.3                 |
| 2001                     | 0.2            | 0.8                   | 0.0           | -0.4 - 0.7                 |
| 2002                     | 1.4            | 2.1                   | 0.8           | 0.4 - 1.7                  |
| 2003                     | 0.4            | 1.0                   | 0.1           | -0.1 - 0.5                 |
| 2004                     | 0.3            | 1.7                   | 0.3           | -0.4 - 0.4                 |
| 2005                     | -0.0           | 1.0                   | 0.0           | 0.0 - 0.5                  |
| 2006                     | 0.5            | 1.6                   | 0.0           | -0.4 - 0.5                 |
| 2007                     | 0.2            | 1.4                   | 0.1           | -0.1 - 1.3                 |
| 2008                     | 0.3            | 1.0                   | 0.3           | -0.4 - 0.5                 |
| 2009                     | 0.8            | 1.5                   | 0.3           | 0.0 - 0.8                  |
| 2010                     | 0.2            | 1.1                   | 0.1           | -0.3 - 0.8                 |
| 2011                     | 0.8            | 1.7                   | 0.2           | 0.0 - 0.5                  |
| 2012                     | 1.2            | 1.6                   | 0.4           | 0.0 - 2.8                  |
| 2013                     | -0.1           | 0.5                   | -0.1          | -0.4 - 0.1                 |
| 2014                     | 0.1            | 0.6                   | 0.0           | -0.1 - 0.4                 |
| 2015                     | 0.0            | 0.1                   | 0.0           | 0.0 - 0.0                  |
| <b>Overall</b>           | <b>0.4</b>     | <b>1.2</b>            | <b>0.0</b>    | <b>-0.1 - 0.4</b>          |

<sup>1</sup> ER visits are for the Winnipeg Regional Health Authority only; <sup>2</sup> The periods for which encounters were averaged (as number per year) was 180 days before to 730 days after diagnosis for invasive cancer; <sup>3</sup> Standard deviation; <sup>4</sup> Q1 and Q3 are the first and third quartile respectively

Supplementary Table 144 **Distribution of excess number of prescriptions<sup>1</sup> (per year) due to invasive cancer of the oropharynx (for patients compared to their matches) among Manitoba males by year of diagnosis (1997-2015).**

| <b>Year of diagnosis</b> | <b>Average</b> | <b>SD<sup>2</sup></b> | <b>Median</b> | <b>Q1 - Q3<sup>3</sup></b> |
|--------------------------|----------------|-----------------------|---------------|----------------------------|
| 1997                     | 10.0           | 11.2                  | 9.9           | 0.9 - 12.5                 |
| 1998                     | 14.6           | 20.1                  | 19.9          | 7.6 - 27.8                 |
| 1999                     | 11.9           | 37.2                  | 14.8          | 1.6 - 29.2                 |
| 2000                     | 8.8            | 14.6                  | 7.2           | -4.8 - 16.1                |
| 2001                     | 9.3            | 36.1                  | 11.1          | 0.5 - 16.1                 |
| 2002                     | 21.9           | 43.4                  | 6.7           | 2.9 - 30.4                 |
| 2003                     | 8.8            | 23.3                  | 3.2           | -9.2 - 16.5                |
| 2004                     | 1.3            | 38.8                  | 4.9           | -10.3 - 19.4               |
| 2005                     | 8.5            | 32.5                  | 13.2          | 3.3 - 30.9                 |
| 2006                     | 4.3            | 30.3                  | 2.4           | -7.1 - 21.0                |
| 2007                     | 0.5            | 42.6                  | 0.4           | -20.5 - 15.5               |
| 2008                     | -21.1          | 90.3                  | -7.2          | -20.5 - 11.9               |
| 2009                     | -17.0          | 72.7                  | 0.4           | -12.5 - 13.0               |
| 2010                     | 7.6            | 33.0                  | 3.2           | -9.2 - 14.1                |
| 2011                     | 17.0           | 57.0                  | 0.7           | -6.8 - 27.1                |
| 2012                     | -12.8          | 165.8                 | 15.3          | -0.9 - 45.1                |
| 2013                     | -4.5           | 49.4                  | 1.1           | -12.3 - 18.5               |
| 2014                     | 14.2           | 56.1                  | 7.6           | -8.4 - 21.7                |
| 2015                     | 0.4            | 21.5                  | -0.4          | -7.6 - 8.3                 |
| <b>Overall</b>           | <b>4.1</b>     | <b>58.5</b>           | <b>4.9</b>    | <b>-7.1 - 20.9</b>         |

<sup>1</sup> The periods for which encounters were averaged (as number per year) was 180 days before to 730 days after diagnosis for invasive cancer; <sup>2</sup> Standard deviation; <sup>3</sup> Q1 and Q3 are the first and third quartile respectively

Supplementary Table 145 **Distribution of excess number of clinician visits<sup>1</sup> (per year) due to invasive cancer of the penis (for patients compared to their matches) among Manitoba males by year of diagnosis (1997-2015).**

| <b>Year of diagnosis</b> | <b>Average</b> | <b>SD<sup>2</sup></b> | <b>Median</b> | <b>Q1 - Q3<sup>3</sup></b> |
|--------------------------|----------------|-----------------------|---------------|----------------------------|
| 1997                     | 29.6           | 3.9                   | 29.6          | 26.8 - 32.4                |
| 1998                     | 12.0           |                       | 12.0          | 12.0 - 12.0                |
| 1999                     | 0.1            | 7.2                   | 0.7           | -9.3 - 6.8                 |
| 2000                     | 3.2            | 11.2                  | 5.1           | 2.9 - 8.7                  |
| 2001                     | 9.9            | 10.4                  | 6.9           | 5.1 - 18.5                 |
| 2002                     | 16.3           | 12.0                  | 13.7          | 7.6 - 25.0                 |
| 2003                     | 11.4           | 18.4                  | 4.7           | 1.3 - 32.2                 |
| 2004                     | 5.9            | 6.8                   | 5.9           | 3.2 - 6.3                  |
| 2005                     | -1.3           | 14.2                  | 2.5           | -17.0 - 10.6               |
| 2006                     | 19.3           | 7.8                   | 18.3          | 12.1 - 27.6                |
| 2007                     | 2.5            | 4.9                   | 4.2           | -2.5 - 6.0                 |
| 2008                     | 5.0            | 7.3                   | 5.7           | -2.1 - 12.8                |
| 2009                     | -0.3           | 19.2                  | -0.3          | -13.9 - 13.2               |
| 2010                     | -3.3           | 7.2                   | -3.3          | -8.4 - 1.7                 |
| 2011                     | 18.0           | 20.8                  | 7.1           | 4.4 - 23.7                 |
| 2012                     | 9.3            | 10.8                  | 8.0           | 3.7 - 13.5                 |
| 2013                     | 1.9            | 16.1                  | 6.9           | -0.3 - 9.3                 |
| 2014                     | 12.0           | 12.4                  | 12.7          | 6.5 - 16.8                 |
| 2015                     | 0.9            | 23.2                  | 3.5           | -6.7 - 11.0                |
| <b>Overall</b>           | <b>6.8</b>     | <b>14.7</b>           | <b>6.5</b>    | <b>0.7 - 12.9</b>          |

<sup>1</sup> The periods for which encounters were averaged (as number per year) was 180 days before to 730 days after diagnosis for invasive cancer; <sup>2</sup> Standard deviation; <sup>3</sup> Q1 and Q3 are the first and third quartile respectively

Supplementary Table 146 **Distribution of excess number of hospital admissions<sup>1</sup> (per year) due to invasive cancer of the penis (for patients compared to their matches) among Manitoba males by year of diagnosis (1997-2015).**

| <b>Year of diagnosis</b> | <b>Average</b> | <b>SD<sup>2</sup></b> | <b>Median</b> | <b>Q1 - Q3<sup>3</sup></b> |
|--------------------------|----------------|-----------------------|---------------|----------------------------|
| 1997                     | 3.1            | 0.3                   | 3.1           | 2.9 - 3.3                  |
| 1998                     | 0.8            |                       | 0.8           | 0.8 - 0.8                  |
| 1999                     | 0.9            | 0.6                   | 0.7           | 0.4 - 1.6                  |
| 2000                     | 1.4            | 1.0                   | 1.2           | 0.7 - 1.7                  |
| 2001                     | 1.0            | 0.5                   | 0.8           | 0.7 - 1.2                  |
| 2002                     | 2.1            | 1.0                   | 2.3           | 1.3 - 2.9                  |
| 2003                     | 0.7            | 1.6                   | 0.0           | 0.0 - 0.3                  |
| 2004                     | 1.2            | 1.0                   | 0.9           | 0.5 - 1.2                  |
| 2005                     | 0.1            | 1.3                   | 0.8           | -1.4 - 0.9                 |
| 2006                     | 0.5            | 0.6                   | 0.1           | 0.1 - 1.2                  |
| 2007                     | 0.8            | 0.5                   | 0.7           | 0.5 - 1.1                  |
| 2008                     | 0.8            | 0.5                   | 0.7           | 0.5 - 0.8                  |
| 2009                     | 2.0            | 0.6                   | 2.0           | 1.6 - 2.4                  |
| 2010                     | 0.9            | 0.8                   | 0.9           | 0.4 - 1.5                  |
| 2011                     | 1.2            | 0.8                   | 0.8           | 0.7 - 1.6                  |
| 2012                     | 0.7            | 0.8                   | 0.4           | 0.4 - 1.5                  |
| 2013                     | 0.5            | 0.6                   | 0.7           | 0.3 - 0.8                  |
| 2014                     | 1.7            | 1.3                   | 1.3           | 0.8 - 2.7                  |
| 2015                     | 0.9            | 1.1                   | 0.5           | 0.0 - 1.9                  |
| <b>Overall</b>           | <b>1.0</b>     | <b>1.0</b>            | <b>0.8</b>    | <b>0.4 - 1.6</b>           |

<sup>1</sup> The periods for which encounters were averaged (as number per year) was 180 days before to 730 days after diagnosis for invasive cancer; <sup>2</sup> Standard deviation; <sup>3</sup> Q1 and Q3 are the first and third quartile respectively



Supplementary Table 147 **Distribution of excess number of ER visits<sup>1,2</sup> (per year) due to invasive cancer of the penis (for patients compared to their matches) among Manitoba males by year of diagnosis (1997-2015).**

| <b>Year of diagnosis</b> | <b>Average</b> | <b>SD<sup>3</sup></b> | <b>Median</b> | <b>Q1 - Q3<sup>4</sup></b> |
|--------------------------|----------------|-----------------------|---------------|----------------------------|
| 1997                     | 0.0            |                       | 0.0           | 0.0 - 0.0                  |
| 1998                     | 0.3            |                       | 0.3           | 0.3 - 0.3                  |
| 1999                     | 0.4            | 1.0                   | 0.1           | -0.3 - 1.0                 |
| 2000                     | 0.0            | 0.3                   | 0.1           | -0.2 - 0.3                 |
| 2001                     | 0.2            | 0.2                   | 0.3           | 0.0 - 0.3                  |
| 2002                     | 0.7            | 1.8                   | 0.7           | -0.5 - 2.0                 |
| 2003                     |                |                       |               |                            |
| 2004                     | 0.3            | 0.4                   | 0.4           | -0.1 - 0.5                 |
| 2005                     | -0.6           |                       | -0.6          | -0.6 - -0.6                |
| 2006                     | 0.3            | 0.3                   | 0.3           | 0.1 - 0.5                  |
| 2007                     | -0.5           | 0.4                   | -0.7          | -0.8 - -0.0                |
| 2008                     | -0.3           | 1.1                   | 0.0           | -0.8 - 0.5                 |
| 2009                     | 1.4            |                       | 1.4           | 1.4 - 1.4                  |
| 2010                     | -0.9           |                       | -0.9          | -0.9 - -0.9                |
| 2011                     | 1.9            | 2.7                   | 1.9           | 0.0 - 3.8                  |
| 2012                     | 0.0            |                       | 0.0           | 0.0 - 0.0                  |
| 2013                     | 0.2            | 0.6                   | 0.4           | -0.1 - 0.7                 |
| 2014                     | 0.4            | 0.4                   | 0.3           | 0.0 - 0.7                  |
| 2015                     | -0.0           | 0.1                   | 0.0           | 0.0 - 0.0                  |
| <b>Overall</b>           | <b>0.2</b>     | <b>0.8</b>            | <b>0.0</b>    | <b>-0.1 - 0.4</b>          |

<sup>1</sup> ER visits are for the Winnipeg Regional Health Authority only; <sup>2</sup> The periods for which encounters were averaged (as number per year) was 180 days before to 730 days after diagnosis for invasive cancer; <sup>3</sup> Standard deviation; <sup>4</sup> Q1 and Q3 are the first and third quartile respectively

Supplementary Table 148 **invasive cancer of the penis Distribution of excess number of prescriptions<sup>1</sup> (per year) due to invasive cancer of the penis (for patients compared to their matches) among Manitoba males by year of diagnosis (1997-2015).**

| <b>Year of diagnosis</b> | <b>Average</b> | <b>SD<sup>2</sup></b> | <b>Median</b> | <b>Q1 - Q3<sup>3</sup></b> |
|--------------------------|----------------|-----------------------|---------------|----------------------------|
| 1997                     | 33.9           | 23.1                  | 33.9          | 17.6 - 50.2                |
| 1998                     | 35.6           |                       | 35.6          | 35.6 - 35.6                |
| 1999                     | -5.9           | 7.9                   | -2.8          | -12.8 - 1.7                |
| 2000                     | 4.7            | 26.1                  | 3.9           | -2.7 - 28.4                |
| 2001                     | 5.4            | 24.9                  | 1.6           | -6.5 - 24.8                |
| 2002                     | 27.8           | 37.9                  | 30.3          | -4.3 - 60.0                |
| 2003                     | 26.7           | 29.4                  | 27.7          | -4.1 - 46.7                |
| 2004                     | 3.9            | 27.8                  | -11.5         | -13.6 - 10.2               |
| 2005                     | 5.2            | 36.6                  | -14.1         | -17.7 - 47.5               |
| 2006                     | -24.3          | 63.3                  | 1.2           | -96.4 - 22.3               |
| 2007                     | -56.1          | 66.2                  | -28.7         | -99.1 - -10.4              |
| 2008                     | -3.7           | 42.6                  | -8.0          | -32.1 - 19.2               |
| 2009                     | 30.5           | 46.4                  | 30.5          | -2.4 - 63.3                |
| 2010                     | 23.5           | 83.4                  | 23.5          | -35.5 - 82.5               |
| 2011                     | 28.9           | 39.1                  | 32.0          | 4.0 - 44.6                 |
| 2012                     | 19.7           | 85.1                  | -19.6         | -29.2 - 107.5              |
| 2013                     | 21.5           | 75.6                  | 12.5          | -3.9 - 25.6                |
| 2014                     | 6.7            | 38.1                  | 6.6           | -19.6 - 26.4               |
| 2015                     | 6.2            | 69.9                  | -9.1          | -13.4 - 8.7                |
| <b>Overall</b>           | <b>6.3</b>     | <b>50.6</b>           | <b>1.2</b>    | <b>-15.1 - 28.0</b>        |

<sup>1</sup> The periods for which encounters were averaged (as number per year) was 180 days before to 730 days after diagnosis for invasive cancer; <sup>2</sup> Standard deviation; <sup>3</sup> Q1 and Q3 are the first and third quartile respectively

**Attributable excess healthcare utilization**

Supplementary Table 149 **Excess number of healthcare encounters<sup>1</sup> (per year) due to HPV-related diseases (for patients compared to their matches) among Manitoba males according to different estimates of the attributable fraction (1997-2015)**

| HPV-related disease                      | Total healthcare encounters | Volesky et al.[3] |                     | Saraiya et al.[2] |                     |
|------------------------------------------|-----------------------------|-------------------|---------------------|-------------------|---------------------|
|                                          |                             | AF <sup>2</sup>   | Attributable visits | AF <sup>2</sup>   | Attributable visits |
| <b>Excess clinician visits</b>           |                             |                   |                     |                   |                     |
| Anogenital warts                         | 67,637                      | 100%              | 67,637              | 100%              | 67,637              |
| All HPV-related carcinoma <i>in situ</i> | 733                         | <sup>3</sup>      | 250                 | <sup>4</sup>      | 424                 |
| All HPV-related invasive cancers         | 11,665                      |                   | 4,876               |                   | 6,823               |
| Invasive cancer of the anus              | 1,167                       | 88%               | 1,027               | 89%               | 1,039               |
| Invasive cancer of the oral cavity       | 4,330                       | 8%                | 346                 | 33%               | 1,429               |
| Invasive cancer of the oropharynx        | 5,224                       | 60%               | 3,134               | 72%               | 3,761               |
| Invasive cancer of the penis             | 943                         | 39%               | 368                 | 63%               | 594                 |
| <b>Total</b>                             | <b>80,034</b>               |                   | <b>72,763</b>       |                   | <b>74,885</b>       |
| <b>Excess hospital admissions</b>        |                             |                   |                     |                   |                     |
| Anogenital warts                         | 2,218                       | 100%              | 2,218               | 100%              | 2,218               |
| All HPV-related carcinoma <i>in situ</i> | 66                          | <sup>3</sup>      | 21                  | <sup>4</sup>      | 36                  |
| All HPV-related invasive cancers         | 1,174                       |                   | 489                 |                   | 688                 |
| Invasive cancer of the anus              | 126                         | 88%               | 111                 | 89%               | 113                 |
| Invasive cancer of the oral cavity       | 425                         | 8%                | 34                  | 33%               | 140                 |
| Invasive cancer of the oropharynx        | 478                         | 60%               | 287                 | 72%               | 344                 |
| Invasive cancer of the penis             | 145                         | 39%               | 56                  | 63%               | 91                  |
| <b>Total</b>                             | <b>3,458</b>                |                   | <b>2,728</b>        |                   | <b>2,943</b>        |
| <b>Excess ER visits<sup>5</sup></b>      |                             |                   |                     |                   |                     |
| Anogenital warts                         | 1,118                       | 100%              | 1,118               | 100%              | 1,118               |
| All HPV-related carcinoma <i>in situ</i> | -3                          | <sup>3</sup>      | -4                  | <sup>4</sup>      | -4                  |
| All HPV-related invasive cancers         | 319                         |                   | 174                 |                   | 213                 |

|                                    |              |     |              |     |              |
|------------------------------------|--------------|-----|--------------|-----|--------------|
| Invasive cancer of the anus        | 107          | 88% | 95           | 89% | 96           |
| Invasive cancer of the oral cavity | 88           | 8%  | 7            | 33% | 29           |
| Invasive cancer of the oropharynx  | 113          | 60% | 68           | 72% | 81           |
| Invasive cancer of the penis       | 11           | 39% | 4            | 63% | 7            |
| <b>Total</b>                       | <b>1,434</b> |     | <b>1,287</b> |     | <b>1,327</b> |

#### Excess prescriptions

|                                          |               |              |               |              |               |
|------------------------------------------|---------------|--------------|---------------|--------------|---------------|
| Anogenital warts                         | 35,618        | 100%         | 35,618        | 100%         | 35,618        |
| All HPV-related carcinoma <i>in situ</i> | 811           | <sup>3</sup> | 297           | <sup>4</sup> | 479           |
| All HPV-related invasive cancers         | 13,811        |              | 7,057         |              | 8,851         |
| Invasive cancer of the anus              | 5,747         | 88%          | 5,057         | 89%          | 5,115         |
| Invasive cancer of the oral cavity       | 5,107         | 8%           | 409           | 33%          | 1,685         |
| Invasive cancer of the oropharynx        | 2,089         | 60%          | 1,253         | 72%          | 1,504         |
| Invasive cancer of the penis             | 868           | 39%          | 338           | 63%          | 547           |
| <b>Total</b>                             | <b>50,239</b> |              | <b>42,973</b> |              | <b>44,947</b> |

<sup>1</sup> The periods for which encounters were averaged (as number per year) were 0 to 365 days after diagnosis for AGW and carcinoma *in situ* and 180 days before to 730 days after diagnosis for invasive cancer; <sup>2</sup> AF = Fraction of disease attributable to HPV; <sup>3</sup> Carcinoma *in situ* AF: 88% for anus, 8% for oral cavity, 60% for oropharynx, and 39% for penis; <sup>4</sup> Carcinoma *in situ* AF: 89% for anus, 33% for oral cavity, 72% for oropharynx, and 63% for penis; <sup>5</sup> ER visits are for the Winnipeg Regional Health Authority only

Supplementary Table 150 **Excess number of clinician visits<sup>1</sup> (per year) due to HPV-related diseases (for patients compared to their matches) among Manitoba males by year of diagnosis according to different estimates of the attributable fraction**

| Year         | Volesky et al.[3] |             | Saraiya et al.[2] |             |
|--------------|-------------------|-------------|-------------------|-------------|
|              | Total             | Per case    | Total             | Per case    |
| 1997         | 3,870             | 4.73        | 3,942             | 4.81        |
| 1998         | 2,710             | 3.87        | 2,798             | 4.00        |
| 1999         | 2,339             | 3.69        | 2,406             | 3.79        |
| 2000         | 2,935             | 4.32        | 3,020             | 4.44        |
| 2001         | 2,945             | 4.48        | 3,043             | 4.62        |
| 2002         | 2,931             | 3.90        | 3,080             | 4.10        |
| 2003         | 3,233             | 4.20        | 3,337             | 4.33        |
| 2004         | 3,843             | 4.68        | 3,959             | 4.82        |
| 2005         | 3,425             | 4.00        | 3,519             | 4.11        |
| 2006         | 3,382             | 4.06        | 3,497             | 4.19        |
| 2007         | 4,185             | 5.21        | 4,275             | 5.32        |
| 2008         | 4,239             | 4.72        | 4,381             | 4.87        |
| 2009         | 4,096             | 4.50        | 4,217             | 4.63        |
| 2010         | 4,613             | 4.66        | 4,725             | 4.78        |
| 2011         | 5,220             | 5.20        | 5,426             | 5.41        |
| 2012         | 4,758             | 4.76        | 4,909             | 4.91        |
| 2013         | 4,323             | 4.80        | 4,424             | 4.91        |
| 2014         | 4,968             | 5.04        | 5,090             | 5.16        |
| 2015         | 4,749             | 4.73        | 4,838             | 4.82        |
| <b>Total</b> | <b>72,763</b>     | <b>4.54</b> | <b>74,885</b>     | <b>4.67</b> |

<sup>1</sup> The periods for which encounters were averaged (as number per year) were 0 to 365 days after diagnosis for AGW and carcinoma *in situ* and 180 days before to 730 days after diagnosis for invasive cancer

Supplementary Table 151 **Excess number of hospital admissions<sup>1</sup> (per year) due to HPV-related diseases (for patients compared to their matches) among Manitoba males by year of diagnosis according to different estimates of the attributable fraction**

| Year         | Volesky et al.[3] |             | Saraiya et al.[2] |             |
|--------------|-------------------|-------------|-------------------|-------------|
|              | Total             | Per case    | Total             | Per case    |
| 1997         | 220               | 0.27        | 230               | 0.28        |
| 1998         | 217               | 0.31        | 230               | 0.33        |
| 1999         | 144               | 0.23        | 154               | 0.24        |
| 2000         | 190               | 0.28        | 199               | 0.29        |
| 2001         | 177               | 0.27        | 189               | 0.29        |
| 2002         | 125               | 0.17        | 140               | 0.19        |
| 2003         | 154               | 0.20        | 163               | 0.21        |
| 2004         | 150               | 0.18        | 162               | 0.20        |
| 2005         | 133               | 0.16        | 143               | 0.17        |
| 2006         | 90                | 0.11        | 100               | 0.12        |
| 2007         | 115               | 0.14        | 125               | 0.16        |
| 2008         | 178               | 0.20        | 192               | 0.21        |
| 2009         | 122               | 0.13        | 133               | 0.15        |
| 2010         | 114               | 0.12        | 125               | 0.13        |
| 2011         | 128               | 0.13        | 141               | 0.14        |
| 2012         | 99                | 0.10        | 110               | 0.11        |
| 2013         | 113               | 0.13        | 122               | 0.14        |
| 2014         | 142               | 0.14        | 155               | 0.16        |
| 2015         | 117               | 0.12        | 130               | 0.13        |
| <b>Total</b> | <b>2,728</b>      | <b>0.17</b> | <b>2,943</b>      | <b>0.18</b> |

<sup>1</sup> The periods for which encounters were averaged (as number per year) were 0 to 365 days after diagnosis for AGW and carcinoma *in situ* and 180 days before to 730 days after diagnosis for invasive cancer

Supplementary Table 152 **Excess number of ER visits<sup>1,2</sup> (per year) due to HPV-related diseases (for patients compared to their matches) among Manitoba males by year of diagnosis according to different estimates of the attributable fraction**

| Year         | Volesky et al.[3] |             | Saraiya et al.[2] |             |
|--------------|-------------------|-------------|-------------------|-------------|
|              | Total             | Per case    | Total             | Per case    |
| 1997         | 1                 | 0.00        | 2                 | 0.00        |
| 1998         | 21                | 0.04        | 23                | 0.04        |
| 1999         | 22                | 0.05        | 24                | 0.05        |
| 2000         | 94                | 0.20        | 96                | 0.20        |
| 2001         | 48                | 0.10        | 50                | 0.11        |
| 2002         | 88                | 0.16        | 91                | 0.17        |
| 2003         | 78                | 0.14        | 80                | 0.14        |
| 2004         | 161               | 0.28        | 166               | 0.29        |
| 2005         | 112               | 0.19        | 114               | 0.19        |
| 2006         | 60                | 0.10        | 62                | 0.10        |
| 2007         | 65                | 0.11        | 65                | 0.11        |
| 2008         | 90                | 0.14        | 91                | 0.14        |
| 2009         | 47                | 0.08        | 51                | 0.08        |
| 2010         | 51                | 0.08        | 54                | 0.08        |
| 2011         | 80                | 0.12        | 83                | 0.12        |
| 2012         | 71                | 0.11        | 76                | 0.11        |
| 2013         | 60                | 0.10        | 64                | 0.11        |
| 2014         | 130               | 0.19        | 131               | 0.19        |
| 2015         | 4                 | 0.01        | 4                 | 0.01        |
| <b>Total</b> | <b>1,287</b>      | <b>0.11</b> | <b>1,327</b>      | <b>0.12</b> |

<sup>1</sup> ER visits are for the Winnipeg Regional Health Authority only; <sup>2</sup> The periods for which encounters were averaged (as number per year) were 0 to 365 days after diagnosis for AGW and carcinoma *in situ* and 180 days before to 730 days after diagnosis for invasive cancer

Supplementary Table 153 **Excess number of prescriptions<sup>1</sup> (per year) due to HPV-related diseases (for patients compared to their matches) among Manitoba males by year of diagnosis according to different estimates of the attributable fraction**

| Year         | Volesky et al.[3] |             | Saraiya et al.[2] |             |
|--------------|-------------------|-------------|-------------------|-------------|
|              | Total             | Per case    | Total             | Per case    |
| 1997         | 2,706             | 3.30        | 2,807             | 3.43        |
| 1998         | 2,139             | 3.06        | 2,273             | 3.25        |
| 1999         | 855               | 1.35        | 942               | 1.49        |
| 2000         | 1,961             | 2.88        | 2,087             | 3.07        |
| 2001         | 2,000             | 3.04        | 2,170             | 3.30        |
| 2002         | 1,119             | 1.49        | 1,299             | 1.73        |
| 2003         | 2,634             | 3.42        | 2,772             | 3.60        |
| 2004         | 2,376             | 2.89        | 2,481             | 3.02        |
| 2005         | 823               | 0.96        | 856               | 1.00        |
| 2006         | 659               | 0.79        | 706               | 0.85        |
| 2007         | 2,041             | 2.54        | 1,836             | 2.29        |
| 2008         | 1,321             | 1.47        | 1,527             | 1.70        |
| 2009         | 2,255             | 2.48        | 2,338             | 2.57        |
| 2010         | 2,863             | 2.89        | 2,880             | 2.91        |
| 2011         | 3,696             | 3.68        | 4,035             | 4.02        |
| 2012         | 2,378             | 2.38        | 2,492             | 2.49        |
| 2013         | 2,766             | 3.07        | 2,916             | 3.24        |
| 2014         | 4,804             | 4.87        | 4,917             | 4.99        |
| 2015         | 3,574             | 3.56        | 3,612             | 3.60        |
| <b>Total</b> | <b>42,973</b>     | <b>2.68</b> | <b>44,947</b>     | <b>2.81</b> |

<sup>1</sup> The periods for which encounters were averaged (as number per year) were 0 to 365 days after diagnosis for AGW and carcinoma *in situ* and 180 days before to 730 days after diagnosis for invasive cancer

References

1. Kliewer EV, Demers AA, Elliott L, Lotocki R, Butler JR, Brisson M. Twenty-year trends in the incidence and prevalence of diagnosed anogenital warts in Canada. *Sexually transmitted diseases*. 2009;36:380–6.
2. Saraiya M, Unger ER, Thompson TD, Lynch CF, Hernandez BY, Lyu CW, et al. US Assessment of HPV Types in Cancers: Implications for Current and 9-Valent HPV Vaccines. *J Natl Cancer Inst [Internet]*. 2015 [cited 2019 Oct 31];107. Available from: <https://academic.oup.com/jnci/article/107/6/djv086/872092>
3. Volesky KD, El-Zein M, Franco EL, Brenner DR, Friedenreich CM, Ruan Y. Cancers attributable to infections in Canada. *Preventive Medicine*. 2019;122:109–17.
